# Supplementary material for: Regulating supramolecular interactions in dimeric macrocycles
Source: Royal Society of Chemistry journal article supplement (doi:10.1039/d3sc00035d), 2023-01-01
Supplement: d3sc00035d1.pdf [file d3sc00035d1.pdf]

*Supporting Information*

**Regulating Supramolecular Interactions in Dimeric Macrocycles**

---

Pengwei Fang,<sup>a,b</sup> Muqing Chen,<sup>\*a,b</sup> Nan Yin,<sup>b</sup> Guilin Zhuang,<sup>\*c</sup> Tianyun Chen,<sup>b</sup>

Xinyu Zhang,<sup>b</sup> Pingwu Du<sup>\*b</sup>

<sup>a</sup> School of Environment and Civil Engineering, Dongguan University of Technology,  
Dongguan, Guangdong Province, 523808, China

<sup>b</sup> Key Laboratory of Precision and Intelligent Chemistry, Hefei National Research  
Center for Physical Sciences at the Microscale, Anhui Laboratory of Advanced  
Photon Science and Technology, Department of Materials Science and Engineering,  
University of Science and Technology of China, 96 Jinzhai Road, Hefei, Anhui  
Province, 230026, China

<sup>c</sup> College of Chemical Engineering, Zhejiang University of Technology, 18 Chaowang  
Road, Hangzhou, Zhejiang Province, 310032, China

\*Corresponding authors: [mqchen@ustc.edu.cn](mailto:mqchen@ustc.edu.cn), [glzhuang@zjut.edu.cn](mailto:glzhuang@zjut.edu.cn),  
[dupingwu@ustc.edu.cn](mailto:dupingwu@ustc.edu.cn).

Tel/Fax: 86-551-63606207

---

## Materials and General Information.

All anhydrous solvents for syntheses and chemicals were purchased from commercial suppliers (Acros or Innochem). All the air-sensitive reactions were carried out using the standard Schlenk technique under nitrogen or argon atmosphere. The NMR spectra were recorded on a Bruker BioSpin ( $^1\text{H}$  400 MHz,  $^{13}\text{C}$  100 MHz) spectrometer in  $\text{CDCl}_3$  solution, and chemical shifts for  $^1\text{H}$  NMR are expressed in parts per million (ppm) relative to tetramethylsilane ( $\delta$  0.00 ppm) or  $\text{CHCl}_3$  ( $\delta$  7.26 ppm). Chemical shifts for  $^{13}\text{C}$  NMR are expressed ppm relative to  $\text{CDCl}_3$  ( $\delta$  77.0 ppm). Data are reported as follows: chemical shift, multiplicity (s = singlet, d = doublet, m = multiplet, br s = broad signal), coupling constant (Hz), and integration. High-resolution mass spectrometry (HR-MS) analyses were carried out using MALDI-TOF-MS techniques and *trans*-2-[3-(4-*tert*-Butylphenyl)-2-methyl-2-propenylidene]malononitrile as the matrix. UV-vis spectra were obtained on a UNIC-3802 spectrophotometer in standard glass cuvettes. Fluorescence spectra were obtained on a FluoroMax-4 spectrofluorometer. Preparative thin-layer chromatography (PTLC) were performed using silica gel GF254 precoated plates and flash chromatography was performed on silica gel (200~300 mesh).

### Synthesis details.

**Synthesis of 4a.** To a mixture of **2a** (180.85 mg, 0.186 mmol), **3** (196.03 mg, 0.186 mmol), and  $\text{K}_2\text{CO}_3$  (770 mg, 5.57 mmol) in a round-bottom flask (500 mL) was added THF (200 mL) and  $\text{H}_2\text{O}$  (40 mL), then  $\text{Pd}(\text{PPh}_3)_4$  (30.06 mg, 0.026 mmol) were added under argon atmosphere. Thereafter, the solution was heated at 68 °C for 48 hours. Upon cooling to room temperature, the solvent was removed under vacuum and the residue was extracted with  $\text{CH}_2\text{Cl}_2$ . The combined organic layer was dried over anhydrous  $\text{MgSO}_4$ , filtered, and concentrated under reduced pressure to afford the crude product as a gray solid for the next step without further purification.

To a 50-mL round-bottom flask containing a magnetic stirring bar were added  $\text{SnCl}_2 \cdot 2\text{H}_2\text{O}$  (274 mg, 1.21 mmol), THF (25 mL) and concentrated HCl (0.21 mL, 12 mol/L) were added, and the resultant mixture was further stirred at room temperature for 30 min. The solution of  $\text{H}_2\text{SnCl}_4/\text{THF}$  was added dropwise to a solution containing the above crude product. After stirring the mixture at room temperature for 2 h, the mixture was quenched with aqueous sodium hydroxide, extracted with  $\text{CH}_2\text{Cl}_2$ , dried over  $\text{Na}_2\text{SO}_4$ , and concentrated under reduced pressure. The crude product was purified by column chromatography (hexane/ $\text{CH}_2\text{Cl}_2$  = 4/1, v/v) to afford **4a** (50 mg, 20% yield over two steps) as a yellow solid.  $^1\text{H}$  NMR ( $\text{CDCl}_3$ , 400 MHz):  $\delta$  (ppm) 8.16 (d,  $J$  = 8 Hz, 2H), 7.69 (dd,  $J$  = 8 Hz, 2H), 7.53-7.46 (m, 18H), 7.40 (d,  $J$  = 8 Hz, 6H), 7.34-7.28 (m, 6H), 7.25 (d,  $J$  = 4 Hz, 2H), 7.16 (dd,  $J$  = 8 Hz, 2H), 7.04 (d,  $J$  = 8 Hz, 6H), 6.86 (dd,  $J$  = 8 Hz, 2H), 6.73 (dd,  $J$  = 8 Hz, 2H), 6.25 (dd,  $J$  = 8 Hz, 2H), 1.13 (s, 18H).  $^{13}\text{C}$  NMR ( $\text{CDCl}_3$ , 100 MHz):  $\delta$  148.23, 142.62, 141.12, 138.30, 138.27, 137.99, 137.87,

137.84, 137.79, 137.01, 136.88, 134.21, 134.15, 132.56, 131.67, 131.57, 131.30, 130.58, 130.40, 130.13, 129.86, 127.43, 127.40, 127.34, 127.30, 127.19, 126.91, 123.92, 123.72, 123.43, 122.79, 120.31, 34.13, 31.15 ppm. HR-MS (MALDI-TOF)  $m/z$  calcd. for  $C_{92}H_{68}Br_2 [M]^+$ : 1332.3667, found: 1332.3683.

**Synthesis of 1a.** To a mixture of **2a** (45.21 mg, 0.046 mmol), **4a** (61.33 mg, 0.046 mmol), and Caesium carbonate (179.85 mg, 0.552 mmol) in a round-bottom flask (500 mL) was added Toluene (250 mL), MeOH (10 mL) and  $H_2O$  (10 mL), then  $Pd_2(dba)_3$  (8.42 mg, 0.0092 mmol) and S-Phos (7.55 mg, 0.0184 mmol) were added under argon atmosphere. Thereafter, the solution was heated at 100 °C for 72 hours. Upon cooling to room temperature, the solvent was removed under vacuum and the residue was extracted with  $CH_2Cl_2$ . The combined organic layer was dried over anhydrous  $MgSO_4$ , filtered, and concentrated under reduced pressure to afford the crude product as a gray solid for the next step without further purification.

To a 50-mL round-bottom flask containing a magnetic stirring bar were added  $SnCl_2 \cdot 2H_2O$  (68.5 mg, 0.303 mol), THF (8 mL) and concentrated HCl (0.05 mL, 12 mol/L) were added, and the resultant mixture was further stirred at room temperature for 30 min. The solution of  $H_2SnCl_4/THF$  was added dropwise to a solution containing the above crude product. After stirring the mixture at room temperature for 2 hours, the mixture was quenched with aqueous sodium hydroxide, extracted with  $CH_2Cl_2$ , dried over  $Na_2SO_4$ , and concentrated under reduced pressure. The crude product was purified initially by silica gel column chromatography and then by preparative thin-layer chromatography (hexane/ $CH_2Cl_2$  = 2/1) to afford **1a** (3.92 mg, 5% yield over two steps)

as a yellow solid.  $^1\text{H}$  NMR ( $\text{CDCl}_3$ , 400 MHz):  $\delta$  (ppm) 8.34 (s, 2H), 8.30 (d,  $J = 8$  Hz, 2H), 7.78 (d,  $J = 8$  Hz, 2H), 7.63-7.43 (m, 52H), 7.39 (d,  $J = 8$  Hz, 4H), 7.34 (d,  $J = 8$  Hz, 4H), 7.2 (d,  $J = 8$  Hz, 4H), 7.00 (br s, 4H), 6.13 (d,  $J = 8$  Hz, 2H), 5.02 (d,  $J = 8$  Hz, 2H), 1.13 (s, 18H).  $^{13}\text{C}$  NMR (100 MHz,  $\text{CDCl}_3$ )  $\delta$  147.64, 144.27, 141.18, 140.05, 138.33, 138.31, 138.23, 138.16, 138.06, 138.00, 137.92, 137.90, 135.21, 133.19, 131.39, 130.99, 130.15, 128.82, 127.99, 127.55, 127.46, 127.37, 127.25, 127.10, 127.03, 126.78, 124.38, 123.68, 123.08, 122.22, 34.11, 31.29 ppm. HR-MS (MALDI-TOF-MS)  $m/z$  calcd. for  $\text{C}_{134}\text{H}_{96} [M]^+$ : 1705.7501, found 1705.7546.

**Synthesis of 4b.** Compound **4b** was prepared by a procedure similar to that used for **4a**, starting from **2b** (194.96 mg, 0.186 mmol) and **3** (196.03 mg, 0.186 mmol). The crude product was purified by silica gel column chromatography (hexane/ $\text{CH}_2\text{Cl}_2 = 4/1$ ) to afford **4b** (57 mg, 22%) as a yellow solid.  $^1\text{H}$  NMR (400 MHz,  $\text{CDCl}_3$ )  $\delta$  (ppm) 8.22 (d,  $J = 8$  Hz, 2H), 7.7 (d,  $J = 8$  Hz, 2H), 7.60-7.53 (m, 20H), 7.47 (d,  $J = 8$  Hz, 4H), 7.38 (m, 6H), 7.31 (m, 6H), 7.23 (d,  $J = 8$  Hz, 2H), 7.14 (d,  $J = 8$  Hz, 2H), 7.02 (d,  $J = 8$  Hz, 4H), 6.87 (d,  $J = 8$  Hz, 2H), 6.72 (d,  $J = 8$  Hz, 2H), 6.25 (d,  $J = 8$  Hz, 2H), 1.12 (s, 18H).  $^{13}\text{C}$  NMR ( $\text{CDCl}_3$ , 100 MHz):  $\delta$  148.23, 142.69, 141.35, 138.44, 138.39, 138.33, 138.19, 138.12, 138.03, 137.92, 136.85, 137.15, 136.93, 134.58, 134.19, 132.51, 131.55, 131.48, 131.33, 130.53, 130.43, 130.07, 129.91, 128.57, 127.40, 127.34, 127.21, 127.09, 126.39, 124.12, 123.71, 123.38, 122.79, 120.33, 34.13, 31.15 ppm. The analytical data is in accordance to the literature.<sup>S1</sup>

**Synthesis of 1b.** Compound **1b** was prepared by a procedure similar to that used for **1a**, starting from **2a** (45.21 mg, 0.046 mmol) and **4b** (65.51 mg, 0.046 mmol). The

crude product was purified initially by silica gel column chromatography and then by preparative thin-layer chromatography (hexane/CH<sub>2</sub>Cl<sub>2</sub> = 2/1) to afford **1b** (4.92 mg, 6%) as a yellow solid. <sup>1</sup>H NMR (CDCl<sub>3</sub>, 400 MHz): δ (ppm) 8.42 (s, 2H), 8.36 (d, *J* = 8 Hz, 2H), 7.80 (d, *J* = 8 Hz, 2H), 7.63-7.48 (m, 56H), 7.42 (d, *J* = 8 Hz, 4H), 7.34 (d, *J* = 8 Hz, 4H), 7.21 (d, *J* = 8 Hz, 4H), 7.00 (br s, 4H), 6.14 (d, *J* = 8 Hz, 2H), 5.03 (d, *J* = 8 Hz, 2H), 1.14 (s, 18H). <sup>13</sup>C NMR (100 MHz, CDCl<sub>3</sub>) δ 147.59, 144.26, 141.70, 140.05, 138.51, 138.31, 138.17, 138.09, 137.97, 137.42, 137.32, 135.45, 133.14, 131.18, 131.13, 131.00, 128.84, 127.99, 127.55, 127.42, 127.35, 127.23, 127.08, 126.77, 124.41, 123.62, 123.06, 122.19, 34.11, 31.29 ppm. HR-MS (MALDI-TOF-MS) *m/z* calcd. for C<sub>140</sub>H<sub>100</sub> [*M*]<sup>+</sup>: 1781.7859, found 1781.7811.

Physical characterizations.

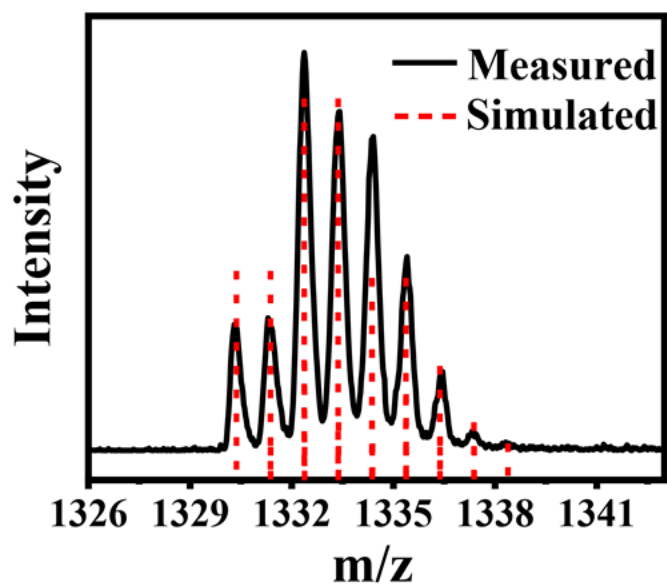

Figure S1. HR-MS (MALDI-TOF) and simulated data for compound 4a.

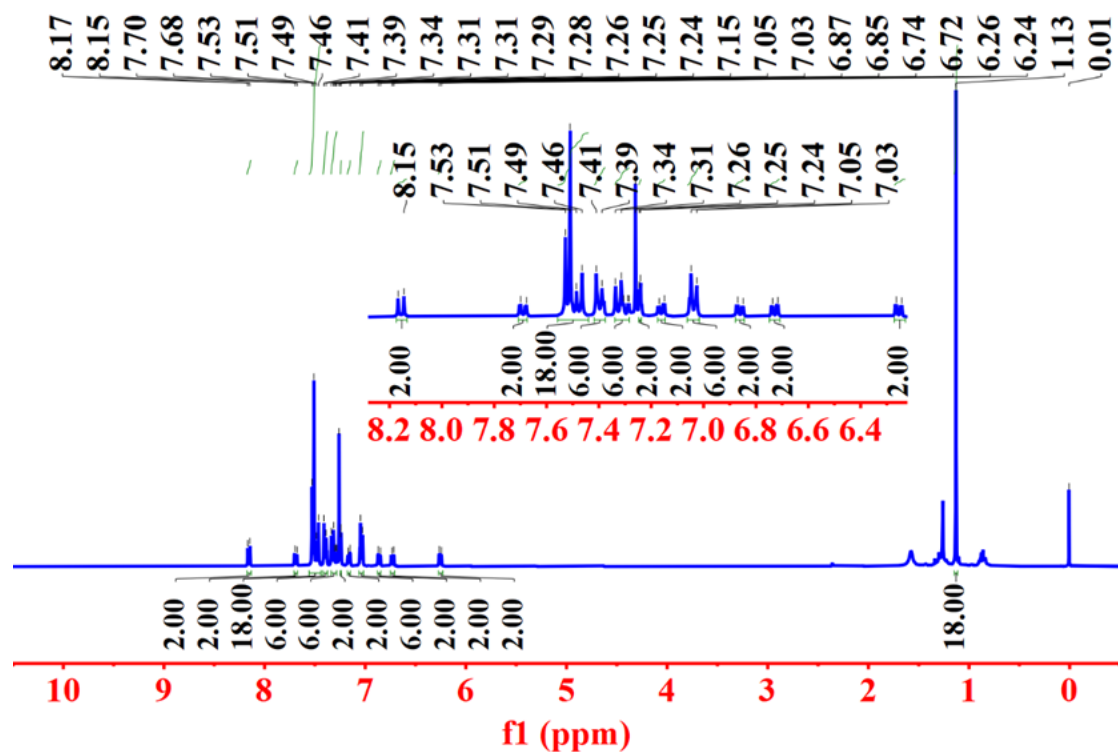

Figure S2.  $^1\text{H}$  NMR spectrum of compound 4a in  $\text{CDCl}_3$ .

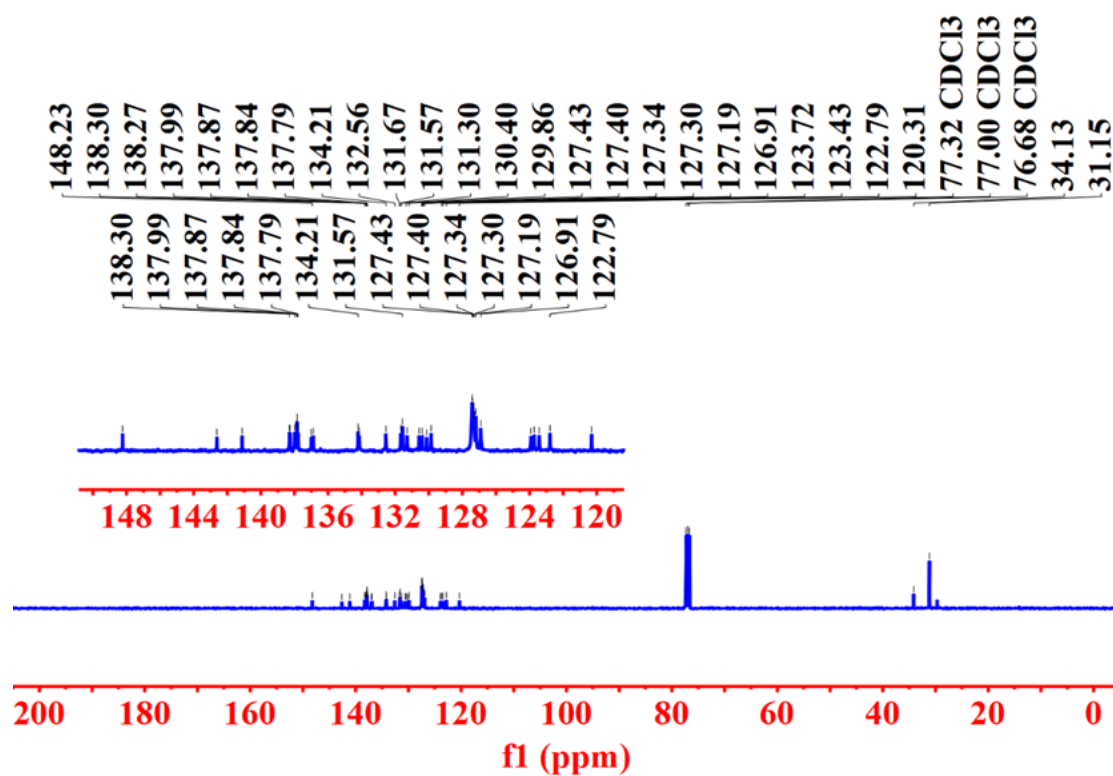

Figure S3. <sup>13</sup>C NMR spectrum of compound **4a** in CDCl<sub>3</sub>.

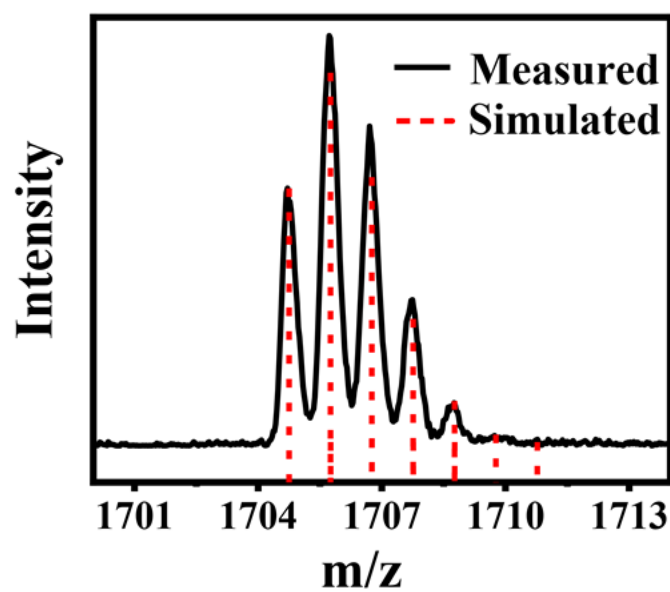

Figure S4. HR-MS (MALDI-TOF) and simulated data for **1a**.

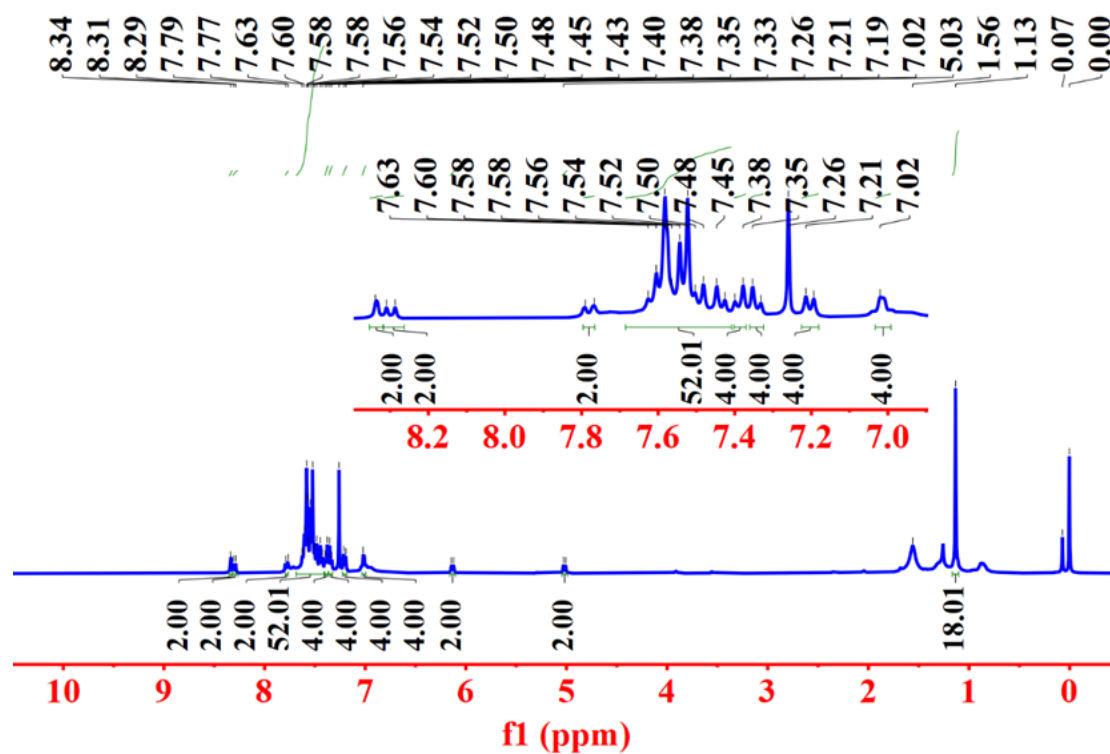

Figure S5. <sup>1</sup>H NMR spectrum (400 MHz, CDCl<sub>3</sub>) of **1a** in CDCl<sub>3</sub>.

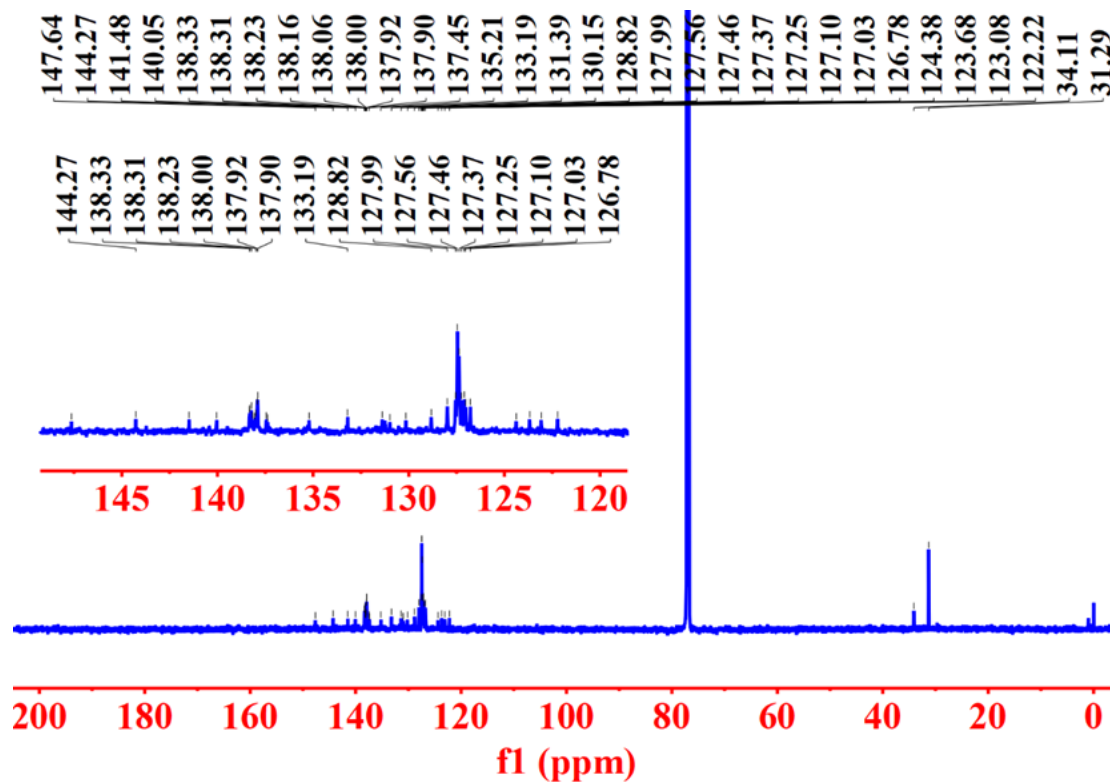

Figure S6. <sup>13</sup>C NMR spectrum (400 MHz, CDCl<sub>3</sub>) of **1a** in CDCl<sub>3</sub>.

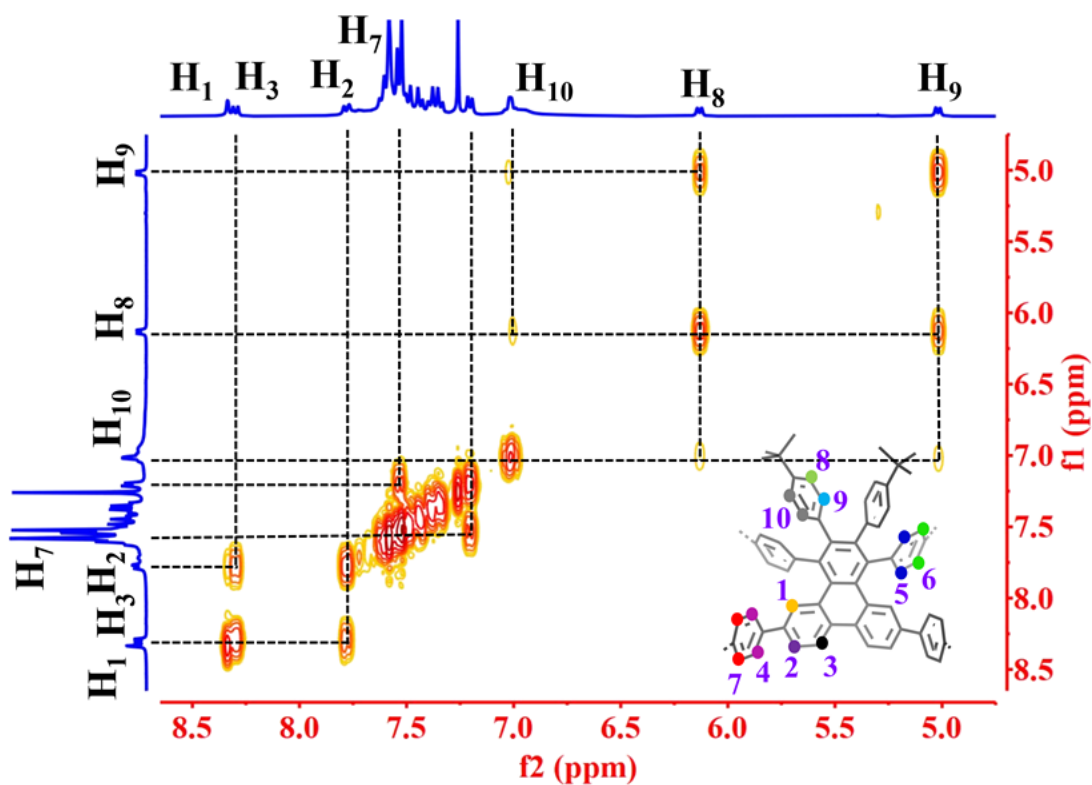

Figure S7. Expanded 2D  $^1\text{H}$ - $^1\text{H}$  COSY NMR spectrum (400 MHz,  $\text{CDCl}_3$ ) of **1a**.

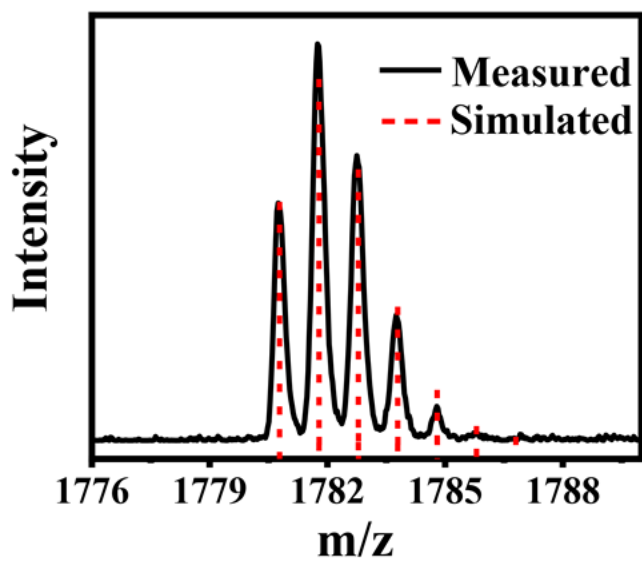

Figure S8. HR-MS (MALDI-TOF) and simulated data for **1b**.

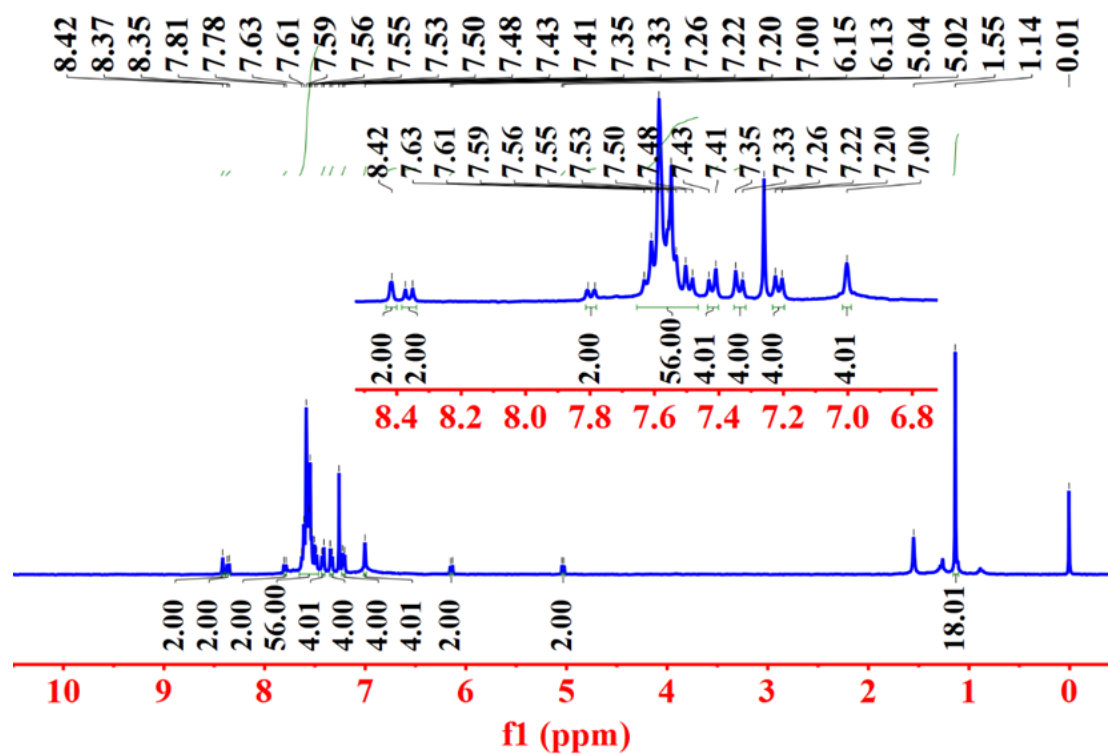

Figure S9. <sup>1</sup>H NMR spectrum (400 MHz, CDCl<sub>3</sub>) of **1b** in CDCl<sub>3</sub>.

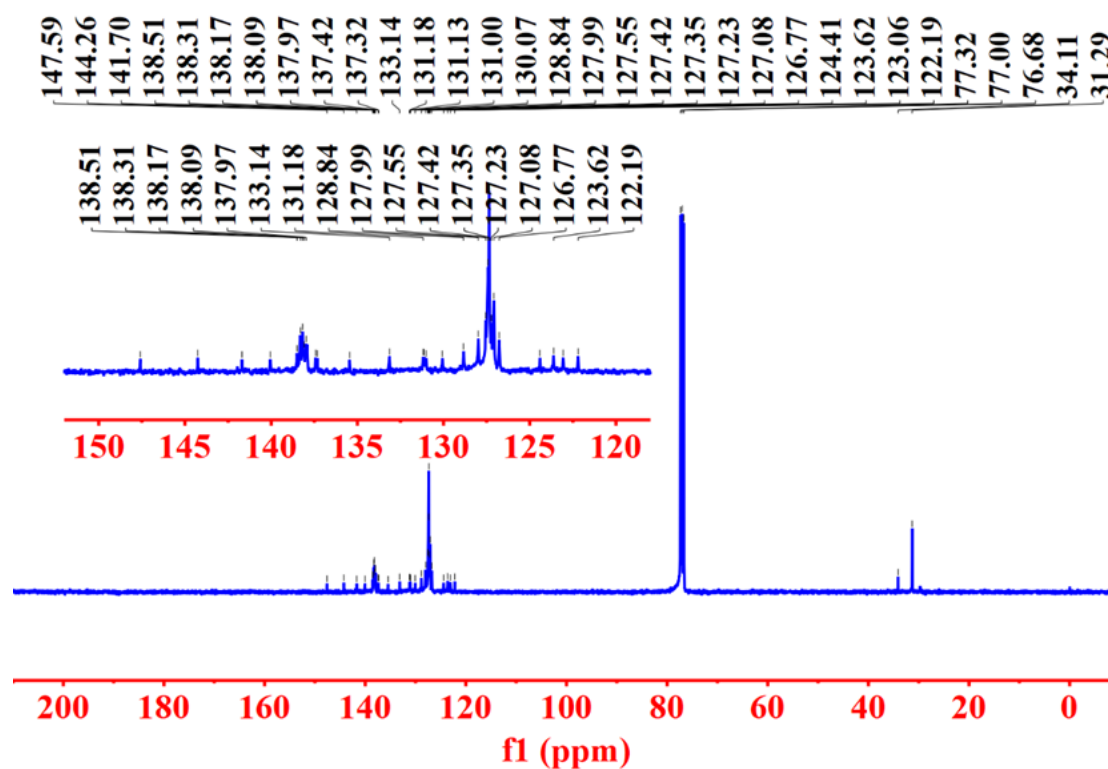

Figure S10. <sup>13</sup>C NMR spectrum (400 MHz, CDCl<sub>3</sub>) of **1b** in CDCl<sub>3</sub>.

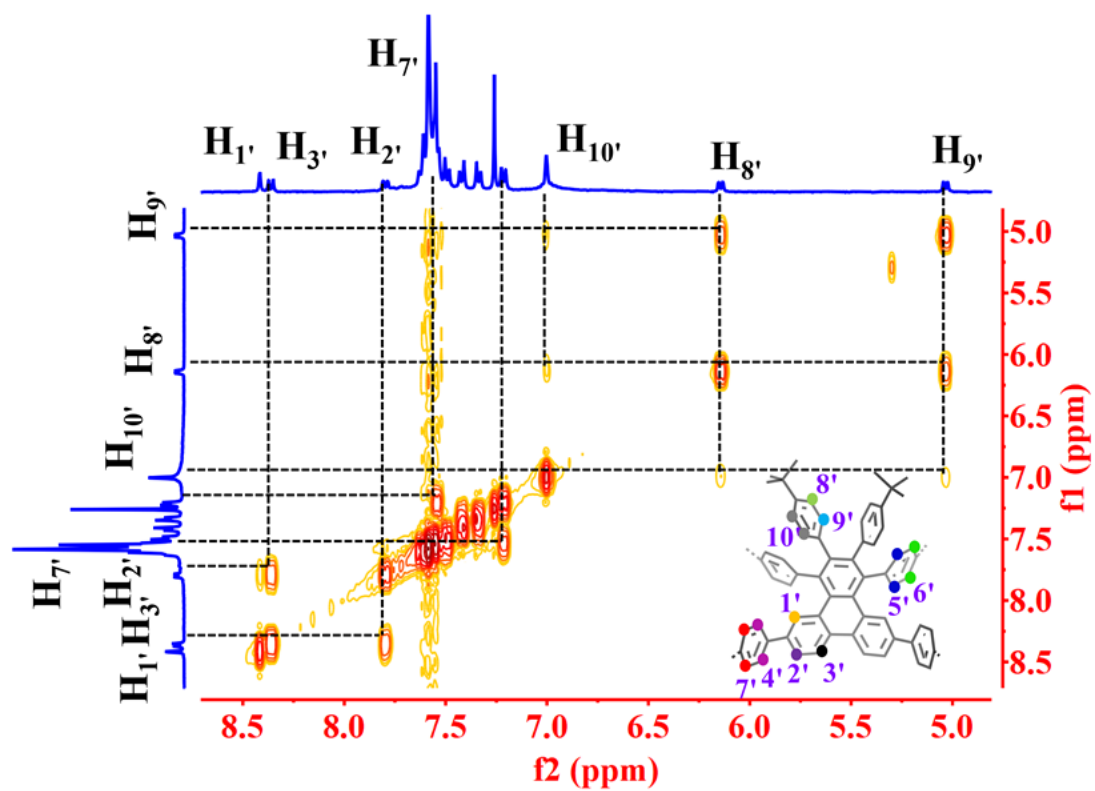

**Figure S11.** Expanded 2D  $^1\text{H}$ - $^1\text{H}$  COSY NMR spectrum (400 MHz,  $\text{CDCl}_3$ ) of **1b**.

## X-ray Crystallography.

Crystalline blocks of  $C_{60}@(\mathbf{1a})_2$  and  $C_{70}@(\mathbf{1a})_2$  were obtained by slow liquid diffusion of hexane into a chlorobenzene solution containing **1a** and excess  $C_{60}$  or  $C_{70}$  afforded black single crystals suitable for X-ray measurements. Crystalline blocks of  $3C_{60}@(\mathbf{1b})_2$  were obtained by slow evaporation of a toluene solution containing **1b** and excess  $C_{60}$ . Single crystal XRD measurements of  $C_{60}@(\mathbf{1a})_2$  and  $C_{70}@(\mathbf{1a})_2$  were conducted at 100 K at a Rigaku Oxford SuperNova Diffractometer using Cu  $K\alpha$  radiation ( $\lambda = 1.54184 \text{ \AA}$ ). Single crystal XRD measurements of  $3C_{60}@(\mathbf{1b})_2$  was conducted at 173 K at the Bruker D8 Venture MetalJet X-ray diffractometer equipped with a Photon II detector using Ga  $K\alpha$  radiation ( $\lambda = 1.34138 \text{ \AA}$ ). The crystal structures were solved with the ShelXT structure solution program using Direct Methods, later refined with the ShelXL refinement package embedded within OLEX2. CCDC-2191567 ( $C_{60}@(\mathbf{1a})_2$ ), CCDC-2191568 ( $C_{70}@(\mathbf{1a})_2$ ), and CCDC-2161639 ( $3C_{60}@(\mathbf{1b})_2$ ) contain the supplementary crystallographic data for this paper. These data can also be obtained free of charge from The Cambridge Crystallographic Data Centre via [www.ccdc.cam.ac.uk/data\\_request/cif](http://www.ccdc.cam.ac.uk/data_request/cif).

**Table S1.** Crystal data and structure refinement for C<sub>60</sub>@(1a)<sub>2</sub>

| Complex                            | C <sub>60</sub> @(1a) <sub>2</sub>                            |
|------------------------------------|---------------------------------------------------------------|
| Formular                           | C <sub>176</sub> H <sub>107</sub> Cl <sub>2</sub>             |
| Formular weight                    | 2292.51                                                       |
| Temperature/K                      | 100(10)                                                       |
| Crystal system                     | triclinic                                                     |
| Space group                        | P1                                                            |
| a / Å                              | 15.9267(3)                                                    |
| b / Å                              | 20.9291(4)                                                    |
| c / Å                              | 22.0491(5)                                                    |
| α / deg                            | 90.828(2)                                                     |
| β / deg                            | 108.688(2)                                                    |
| γ / deg                            | 93.047(2)                                                     |
| Volume/Å <sup>3</sup>              | 6948.5(3)                                                     |
| Z                                  | 2                                                             |
| ρ <sub>calc</sub> /cm <sup>3</sup> | 1.096                                                         |
| μ/mm <sup>-1</sup>                 | 0.817                                                         |
| F(000)                             | 2394                                                          |
| Crystal size/mm <sup>3</sup>       | 0.1 × 0.08 × 0.07                                             |
| Radiation                          | Cu Kα (λ = 1.54184)                                           |
| 2Θ range for data collection/°     | 5.868 to 139.278                                              |
| Index ranges                       | -17 ≤ h ≤ 19, -25 ≤ k ≤ 25, -26 ≤ l ≤ 26                      |
| Reflections collected              | 84249                                                         |
| Independent reflections            | 25463[R <sub>int</sub> = 0.0495, R <sub>sigma</sub> = 0.0502] |
| Data/restraints/parameters         | 25463/891/1910                                                |
| Goodness-of-fit on F <sup>2</sup>  | 1.028                                                         |
| Final R indexes [I>=2σ (I)]        | R <sub>1</sub> = 0.1178, wR <sub>2</sub> = 0.3410             |
| Final R indexes [all data]         | R <sub>1</sub> = 0.1311, wR <sub>2</sub> = 0.3518             |

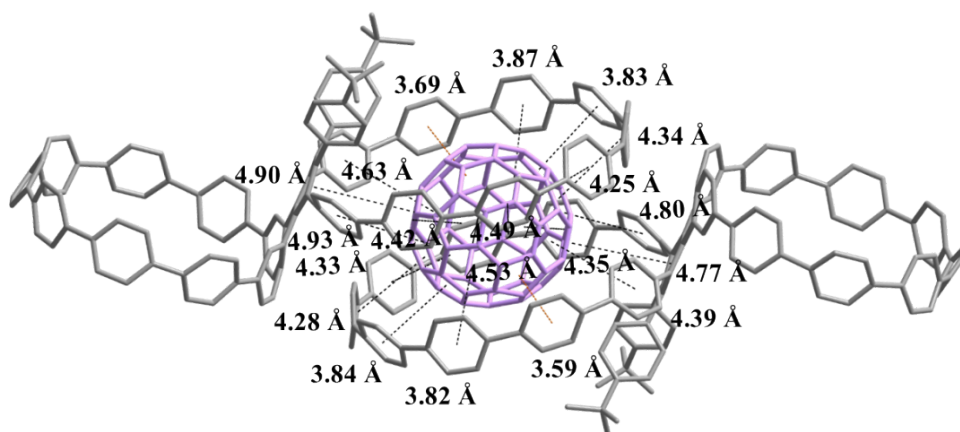

**Figure S12.** Side-views of a  $C_{60}@(1a)_2$  complex highlighting the  $\pi$ - $\pi$  interactions between the guests and cavities. Hydrogen atoms and disordered solvent molecules are omitted for clarity.

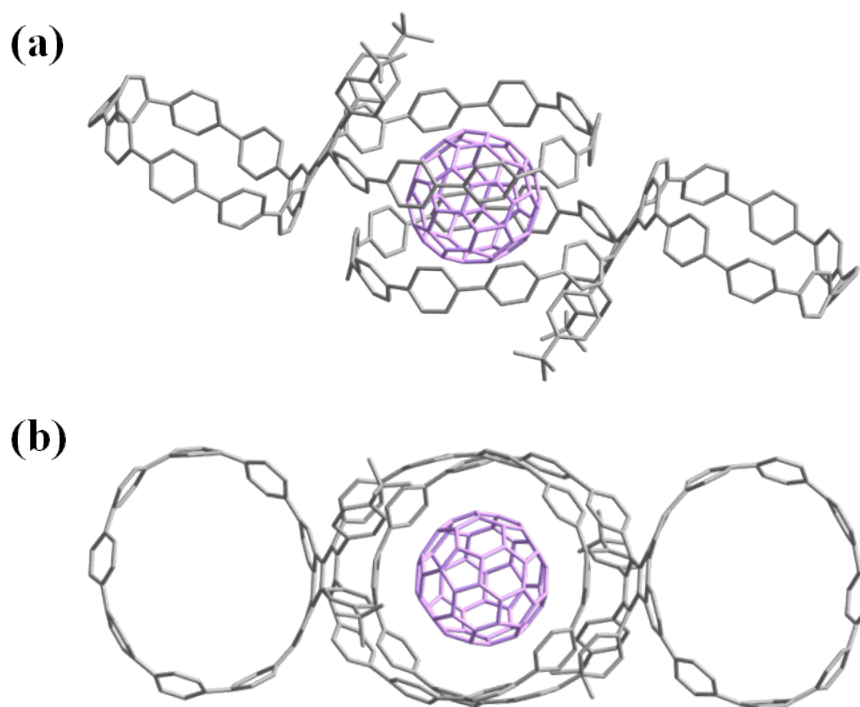

**Figure S13.** Side view (a) and top view (b) of the X-ray crystal structure of  $C_{60}@(1a)_2$ .

Hydrogen atoms and disordered solvent molecules are omitted for clarity.

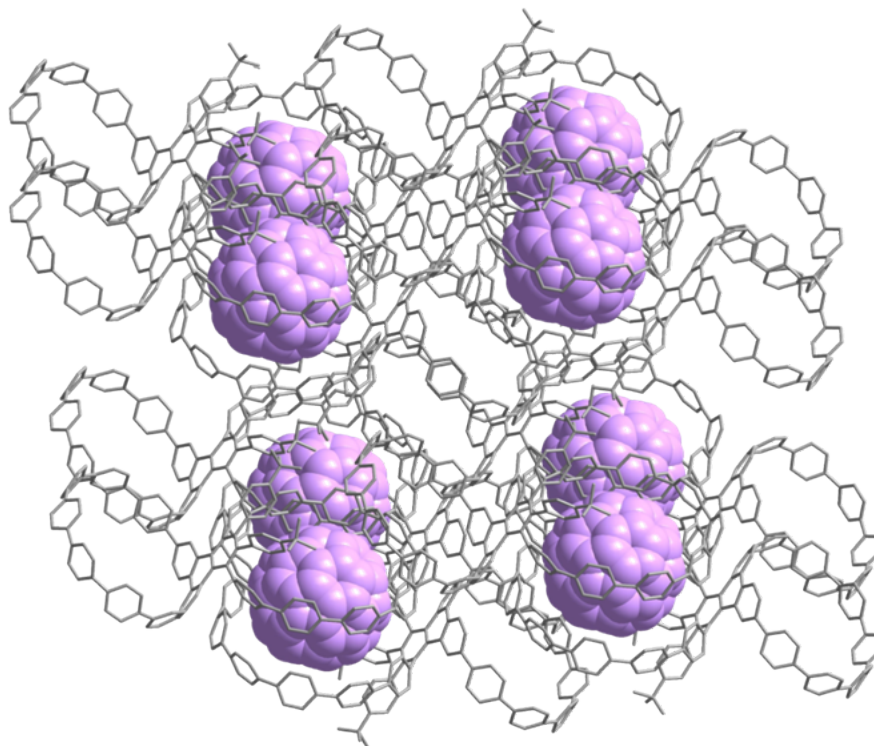

**Figure S14.** Packing structure of  $C_{60}@(\mathbf{1a})_2$ . Hydrogen atoms and solvent molecules are omitted for clarity.

**Table S2.** Crystal data and structure refinement for  $C_{70}@(\mathbf{1a})_2$

| Complex               | $C_{70}@(\mathbf{1a})_2$ |
|-----------------------|--------------------------|
| Formular              | $C_{315}H_{110}$         |
| Formular weight       | 3894.02                  |
| Temperature/K         | 100(2)                   |
| Crystal system        | monoclinic               |
| Space group           | P21/c                    |
| a / Å                 | 20.6555(2)               |
| b / Å                 | 38.6556(5)               |
| c / Å                 | 25.2345(3)               |
| $\alpha$ / deg        | 90                       |
| $\beta$ / deg         | 105.3310(10)             |
| $\gamma$ / deg        | 90                       |
| Volume/Å <sup>3</sup> | 19431.5(4)               |

|                                                |                                                                |
|------------------------------------------------|----------------------------------------------------------------|
| Z                                              | 4                                                              |
| $\rho_{\text{calc}}/\text{g}/\text{cm}^3$      | 1.331                                                          |
| $\mu/\text{mm}^{-1}$                           | 0.584                                                          |
| F(000)                                         | 8000                                                           |
| Crystal size/ $\text{mm}^3$                    | $0.06 \times 0.05 \times 0.05$                                 |
| Radiation                                      | Cu K $\alpha$ ( $\lambda = 1.54184$ )                          |
| 2 $\Theta$ range for data collection/ $^\circ$ | 4.99 to 139.218                                                |
| Index ranges                                   | $-21 \leq h \leq 25, -45 \leq k \leq 46, -30 \leq l \leq 30$   |
| Reflections collected                          | 128766                                                         |
| Independent reflections                        | 35548 [ $R_{\text{int}} = 0.0541, R_{\text{sigma}} = 0.0563$ ] |
| Data/restraints/parameters                     | 35548/3508/3790                                                |
| Goodness-of-fit on $F^2$                       | 1.063                                                          |
| Final R indexes [ $I \geq 2\sigma(I)$ ]        | $R_1 = 0.1406, wR_2 = 0.4175$                                  |
| Final R indexes [all data]                     | $R_1 = 0.1629, wR_2 = 0.4408$                                  |

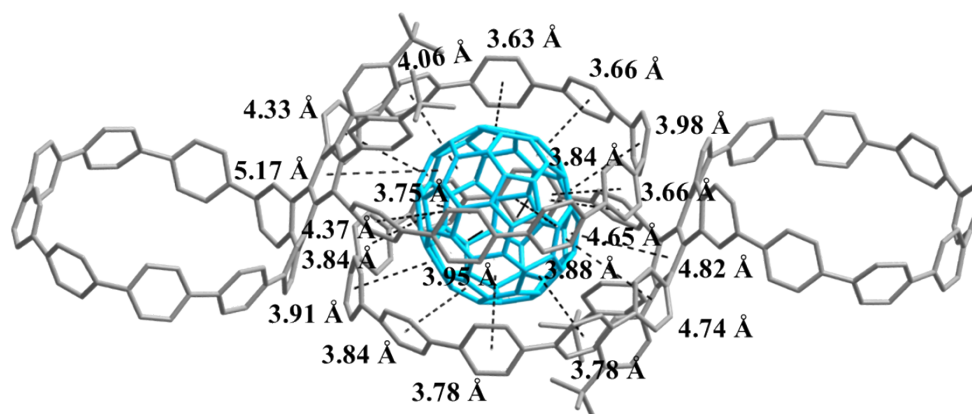

**Figure S15.** Side-views of a  $\text{C}_{70}@\text{(1a)}_2$  complex highlighting the  $\pi$ - $\pi$  interactions between the guests and cavities. Hydrogen atoms and disordered solvent molecules are omitted for clarity.

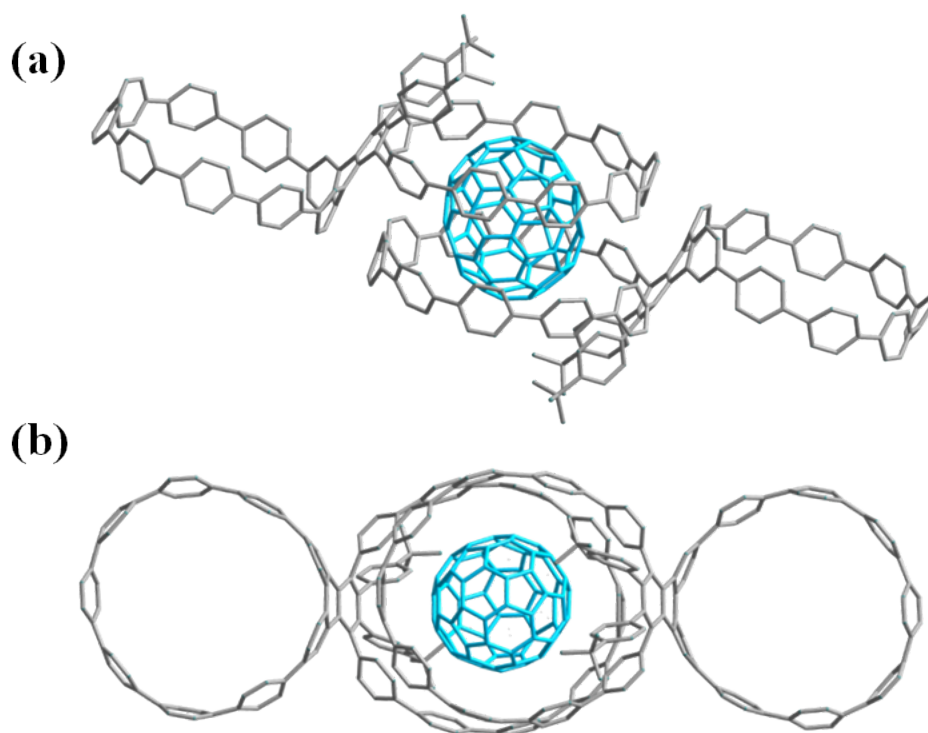

**Figure S16.** Side view (a) and top view (b) of the X-ray crystal structure of  $C_{70}@(1a)_2$ . Hydrogen atoms and disordered solvent molecules are omitted for clarity.

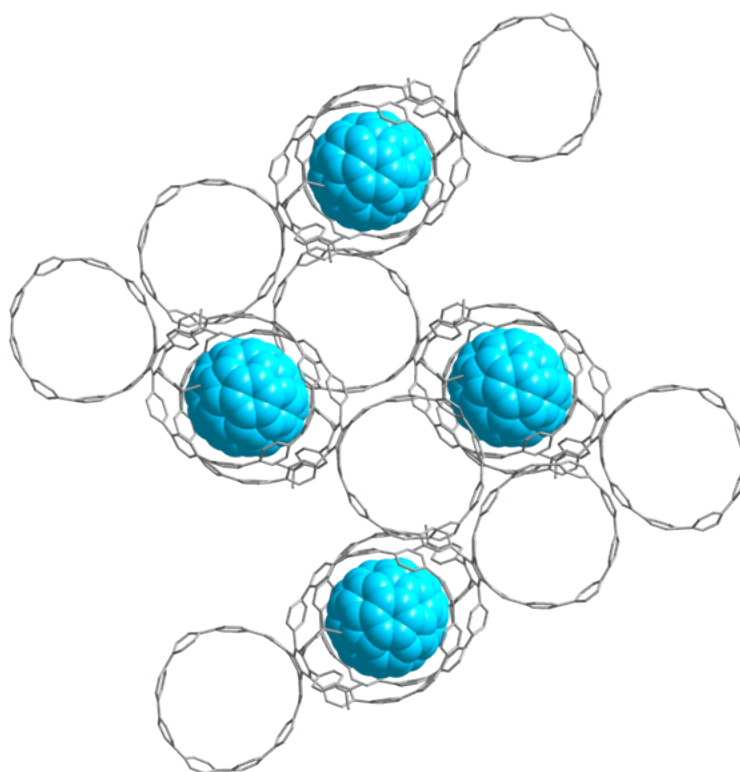

**Figure S17.** Packing structure of  $C_{70}@(1a)_2$ . Hydrogen atoms and solvent molecules are omitted for clarity.

**Table S3.** Crystal data and structure refinement for 3C<sub>60</sub>@(1b)<sub>2</sub>

| Complex                                | 3C <sub>60</sub> @(1b) <sub>2</sub>                           |
|----------------------------------------|---------------------------------------------------------------|
| Formular                               | C <sub>1158</sub> H <sub>672</sub>                            |
| Formular weight                        | 14584.92                                                      |
| Temperature/K                          | 173(2)                                                        |
| Crystal system                         | monoclinic                                                    |
| Space group                            | P21/n                                                         |
| a / Å                                  | 20.8830(7)                                                    |
| b / Å                                  | 27.5133(9)                                                    |
| c / Å                                  | 33.7675(11)                                                   |
| $\alpha$ / deg                         | 90                                                            |
| $\beta$ / deg                          | 97.309(2)                                                     |
| $\gamma$ / deg                         | 90                                                            |
| Volume/Å <sup>3</sup>                  | 19243.8(11)                                                   |
| Z                                      | 1                                                             |
| $\rho_{\text{calc}}/\text{cm}^3$       | 1.259                                                         |
| $\mu/\text{mm}^{-1}$                   | 0.350                                                         |
| F(000)                                 | 7620.0                                                        |
| Crystal size/mm <sup>3</sup>           | 0.340 × 0.210 × 0.170                                         |
| Radiation                              | Ga K $\alpha$ ( $\lambda$ = 1.34138)                          |
| 2 $\Theta$ range for data collection/° | 6.042 to 106.074                                              |
| Index ranges                           | -24 ≤ h ≤ 20, -32 ≤ k ≤ 32, -40 ≤ l ≤ 40                      |
| Reflections collected                  | 195069                                                        |
| Independent reflections                | 33959[R <sub>int</sub> = 0.0495, R <sub>sigma</sub> = 0.0407] |
| Data/restraints/parameters             | 33959/2201/3350                                               |
| Goodness-of-fit on F <sup>2</sup>      | 1.039                                                         |
| Final R indexes [I ≥ 2 $\sigma$ (I)]   | R <sub>1</sub> = 0.0904, wR <sub>2</sub> = 0.2630             |
| Final R indexes [all data]             | R <sub>1</sub> = 0.1055, wR <sub>2</sub> = 0.2790             |

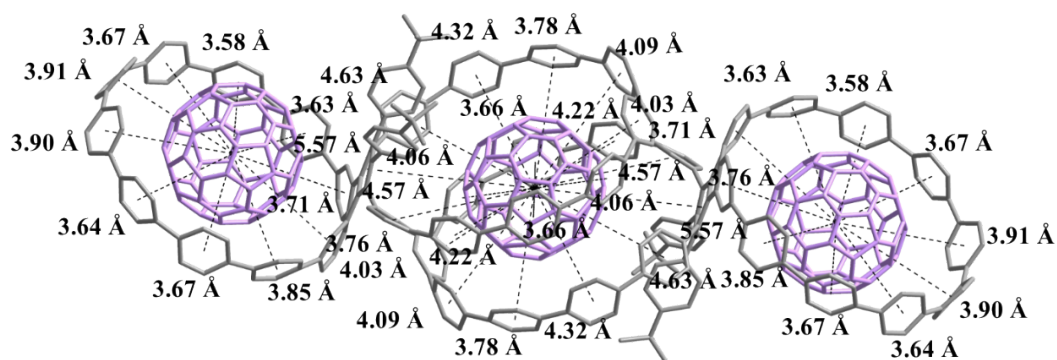

**Figure S18.** Side-views of a  $C_{70}@(1a)_2$  complex highlighting the  $\pi$ - $\pi$  interactions between the guests and cavities. Hydrogen atoms and disordered solvent molecules are omitted for clarity.

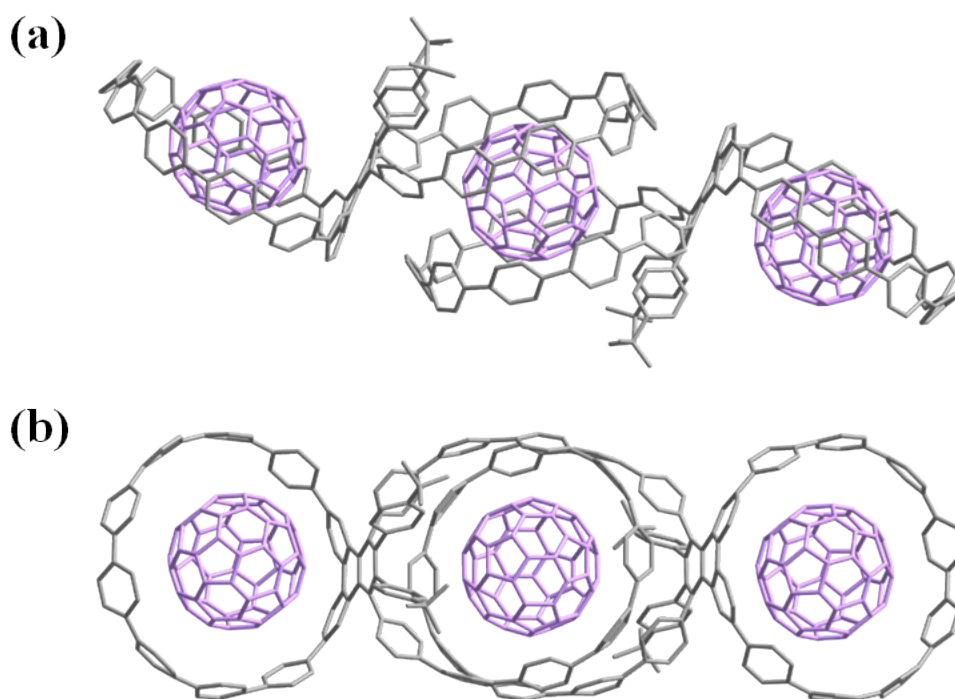

**Figure S19.** Side view (a) and top view (b) of the X-ray crystal structure of  $3C_{60}@(1b)_2$ . Hydrogen atoms and disordered solvent molecules are omitted for clarity.

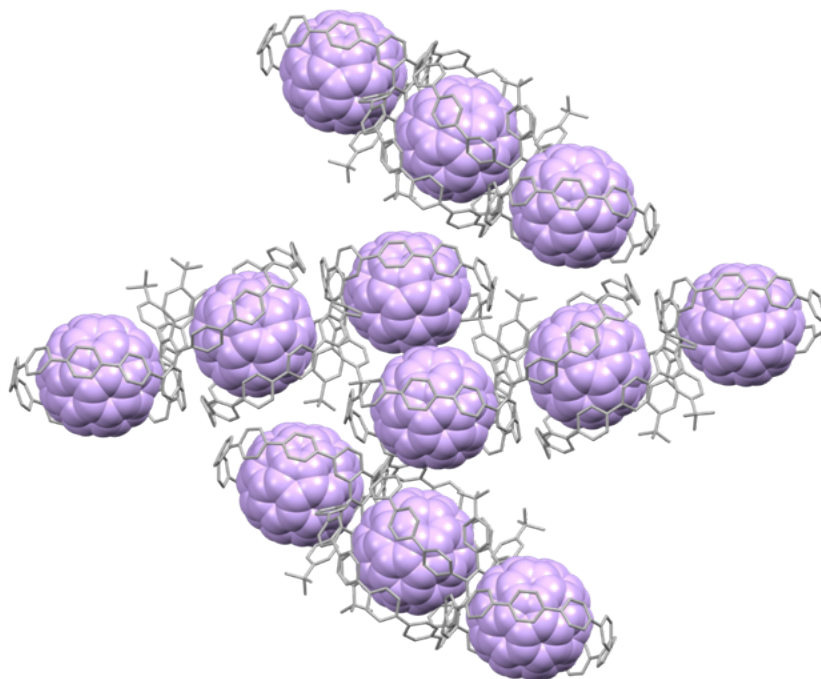

**Figure S20.** Packing structure of  $3\text{C}_{60}@\text{(1b)}_2$ . Hydrogen atoms and solvent molecules are omitted for clarity.

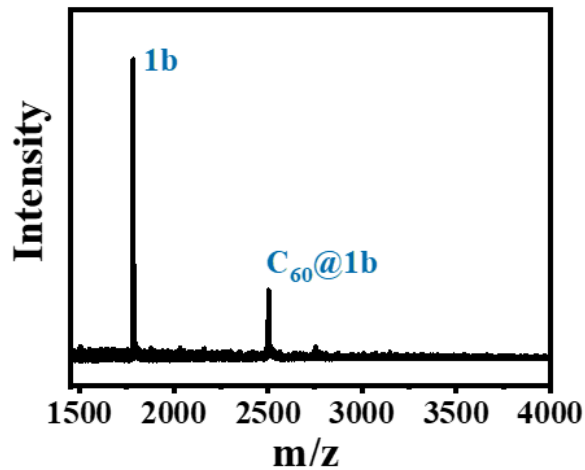

**Figure S21.** HR-MS (MALDI-TOF) data for  $\text{C}_{60}@\text{1b}$  complex.

### Fluorescence Quenching Experiments.

Fluorescence quenching was studied by the addition of  $\text{C}_{60}$  to **1b**. To a solution of **1b** ( $3.33 \times 10^{-6}$  M) in toluene was added a solution of the  $\text{C}_{60}$  in toluene at 25 °C. The

concentrations of  $C_{60}$  range from 0 to  $1.0 \times 10^{-5}$  M. The changes in the fluorescence intensity of **1b** were measured at 474 nm. The binding constant ( $K_a$ ) was determined by using equation:<sup>S2, S3</sup>

$$F/F_0 = (1 + (k_f/k_s)K_a[\text{guest}])/(1 + K_a[\text{guest}])$$

F: fluorescence intensity of **1b**

$F_0$ : fluorescence intensity of **1b** before the addition of  $C_{60}$

$k_f$ : the proportionality constant of the complex

$k_s$ : the proportionality constant of the host

[guest]: concentration of  $C_{60}$

$K_a$ : binding constant

Data points of fluorescence quenching experiments at 438 nm, 450 nm, 474 nm, and 485nm were fitted by the open access web portal Supramolecular.org (<http://supramolecular.org>). Links to all the fittings of the data are provided below:

1:1

<http://app.supramolecular.org/bindfit/view/3bd45da6-ec97-4de5-a79a-a729d09f9006>

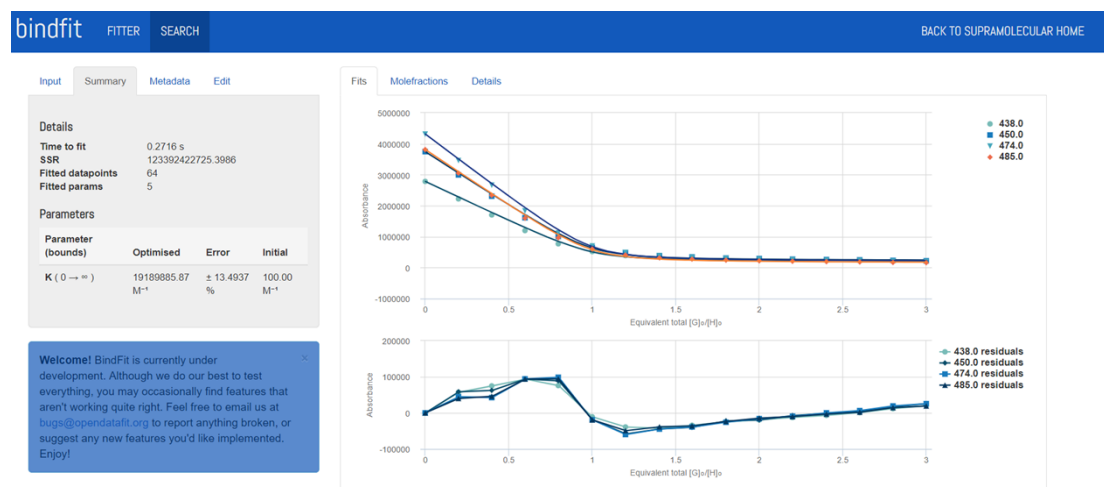

**Figure S22.** Screenshot from the result window of *supramolecular.org* from data archived at the unique url: <http://app.supramolecular.org/bindfit/view/3bd45da6-ec97-4de5-a79a-a729d09f9006> which was fitted to 1:1 fluorescence quenching data.

**1:2 full**

<http://app.supramolecular.org/bindfit/view/be2cffe8-ec0e-47f1-8901-f8cd76c59e9d>

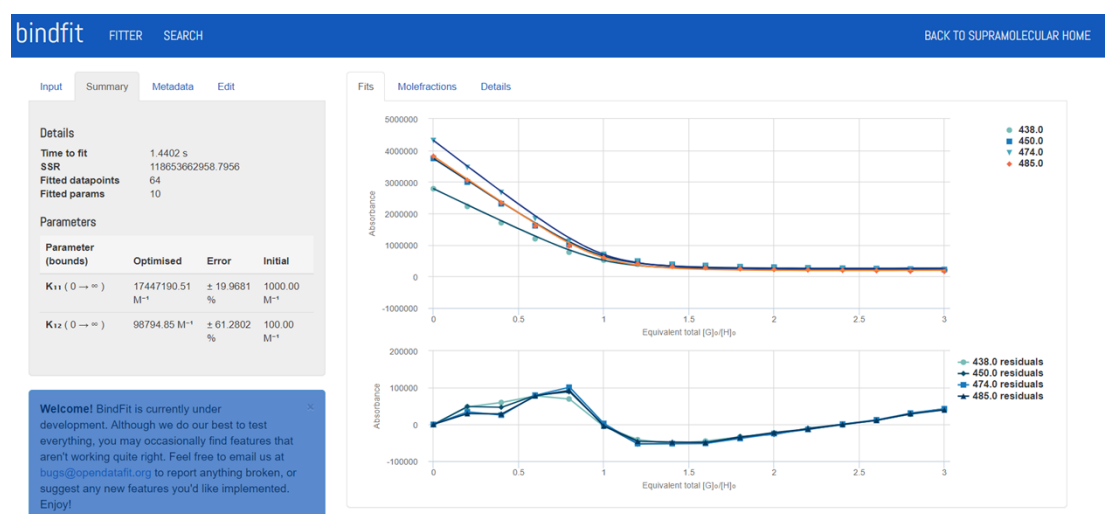

**Figure S23.** Screenshot from the result window of *supramolecular.org* from data archived at the unique url: <http://app.supramolecular.org/bindfit/view/be2cffe8-ec0e-47f1-8901-f8cd76c59e9d> which was fitted to 1:2 full fluorescence quenching data.

**1:2 additive**

<http://app.supramolecular.org/bindfit/view/03e7c184-a79a-46c9-ba91-e7bc0aef0e58>

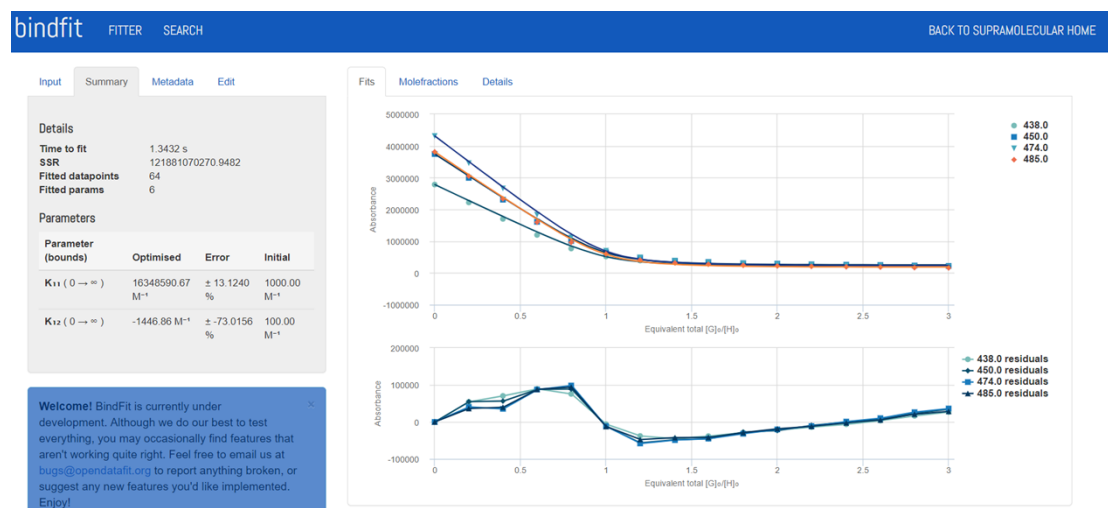

**Figure S24.** Screenshot from the result window of *supramolecular.org* from data archived at the unique url: <http://app.supramolecular.org/bindfit/view/03e7c184-a79a-46c9-ba91-e7bc0aef0e58> which was fitted to 1:2 additive fluorescence quenching data.

## 1:2 non-cooperative

<http://app.supramolecular.org/bindfit/view/442de229-7fe8-4bc5-9958-744f573cde59>

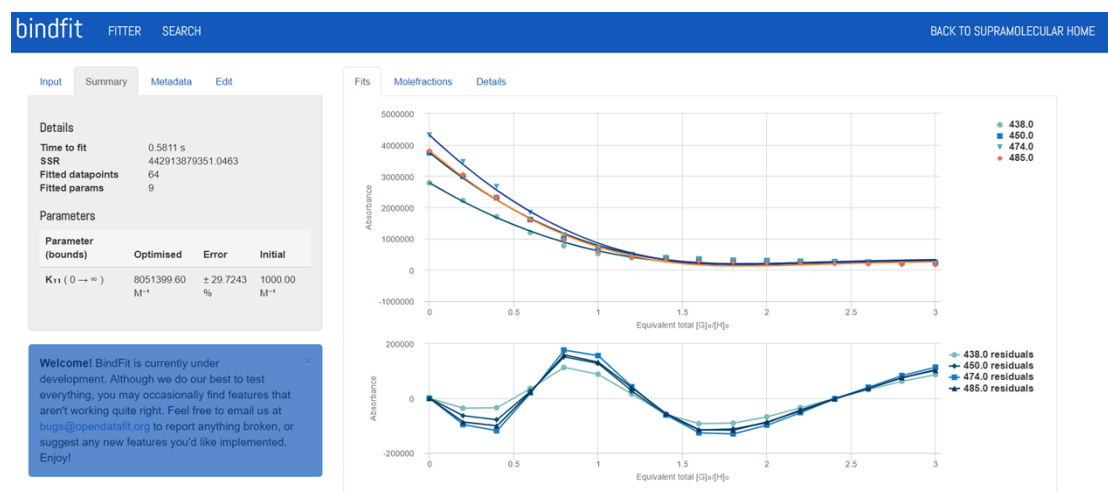

**Figure S25.** Screenshot from the result window of *supramolecular.org* from data archived at the unique url: <http://app.supramolecular.org/bindfit/view/442de229-7fe8-4bc5-9958-744f573cde59> which was fitted to 1:2 non-cooperative fluorescence quenching data.

## 1:2 statistical

<http://app.supramolecular.org/bindfit/view/1ec97175-692d-47e1-bc84-950104d43590>

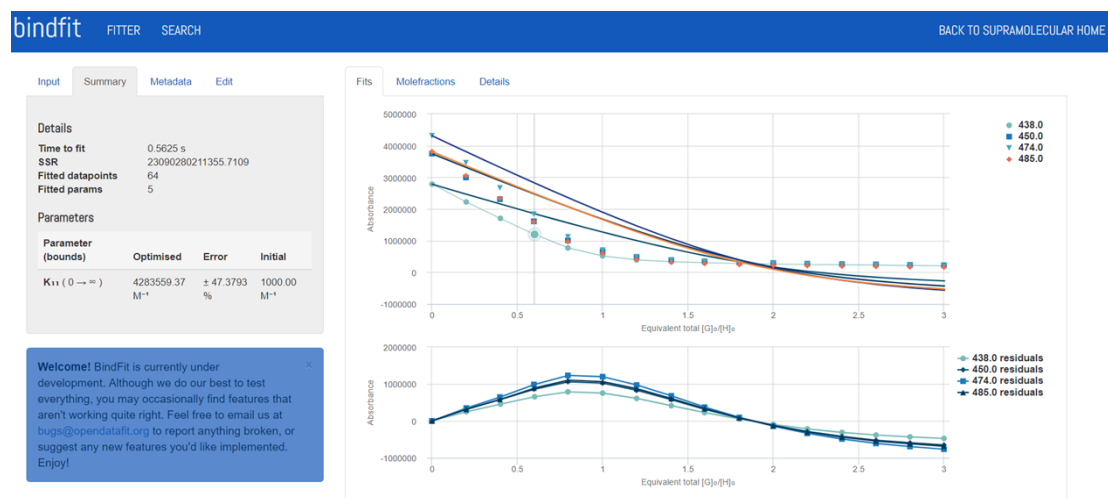

**Figure S26.** Screenshot from the result window of *supramolecular.org* from data archived at the unique url: <http://app.supramolecular.org/bindfit/view/1ec97175-692d-47e1-bc84-950104d43590> which was fitted to 1:2 statistical fluorescence quenching data.

## Computational Details.

Density functional theory calculations were used to identify the performed by using Gaussian 09 software.<sup>S4</sup> Geometrical optimization were carried out at the theoretical level of B3LYP/6-31G(d,p), where DFT-D3(BJ)<sup>S5</sup> and Polarizable continuum model (PCM)<sup>S6</sup> methodologies can be used to correct dispersion force and solvent effect of dichloromethane. The resultant structures were further validated by frequency analysis without imaginary frequency. The strain energy (SE) was calculated using the reported computational methods.<sup>S7, S8</sup> Moreover, time-dependent density functional theory (TD-DFT) with PBE0/6-31G(d,p)//PCM were used to simulate the UV spectra. The

S25

interaction between fullerene and bismacrocycle is typically evaluated following the formula:  $E_{\text{int}} = E(\text{fullerene@bismacrocycle}) - E(\text{bismacrocycle}) - E(\text{fullerene})$ , where  $E(\text{fullerene@bismacrocycle})$ ,  $E(\text{bismacrocycle})$  and  $E(\text{fullerene})$  are the energy of optimized molecule, respectively.

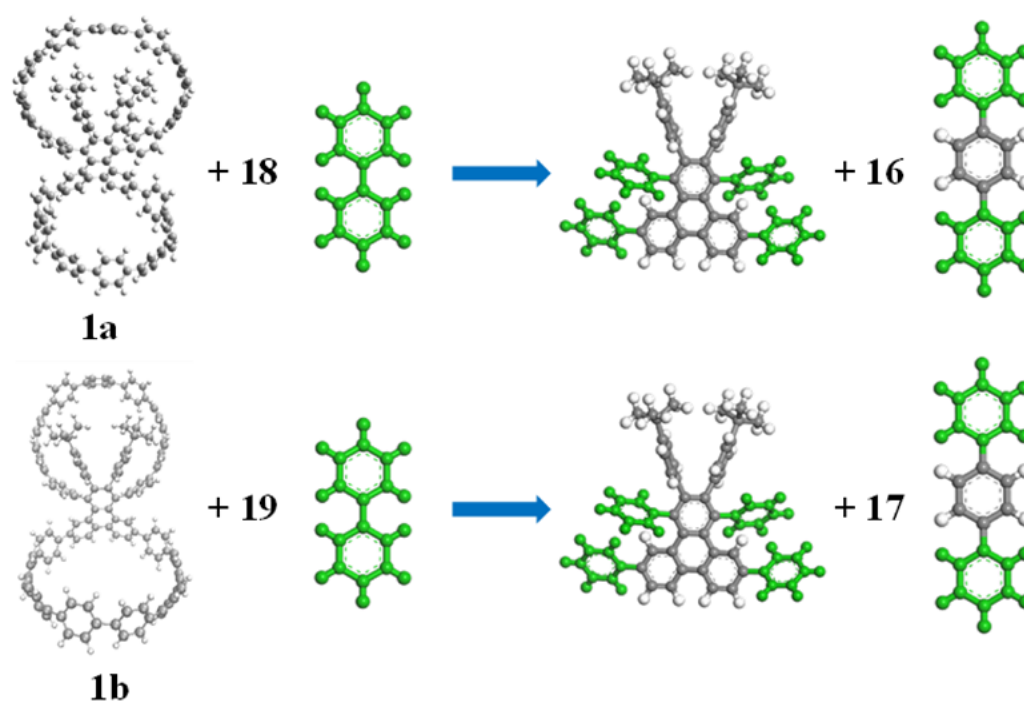

**Figure S27.** The calculation scheme of strain energy of **1a** and **1b**.

**Table S4.** Energy and strain energy for [9]CPP, [10]CPP, **1a**, and **1b**

| [9]CPP                   |               |
|--------------------------|---------------|
| Biphenyl                 | -463.3704144  |
| Triphenyl                | -694.4619375  |
| [9]CPP                   | -2079.7205796 |
| strain energy (kcal/mol) | 64.71         |

| [10]CPP                                |               |
|----------------------------------------|---------------|
| Biphenyl                               | -463.3704144  |
| Triphenyl                              | -694.4619375  |
| [10]CPP                                | -2310.820458  |
| strain energy (kcal/mol)               | 59.47         |
| 1a                                     |               |
| Biphenyl                               | -463.3704144  |
| Triphenyl                              | -694.4619375  |
| 1a                                     | -5164.9571664 |
| Bridging phenyl with tert-Butylbenzene | -2394.397954  |
| strain energy (kcal/mol)               | 103.12        |
| 1b                                     |               |
| Biphenyl                               | -463.3704144  |
| Triphenyl                              | -694.4619375  |
| 1b                                     | -5396.048569  |
| Bridging phenyl with tert-Butylbenzene | -2394.397954  |
| strain energy (kcal/mol)               | 103.19        |

**Table S5.** energy level (unit: eV) of frontier molecular orbitals for **1a**, **1b**, C<sub>60</sub>@(**1a**)<sub>2</sub>, C<sub>70</sub>@(**1a**)<sub>2</sub>, and 3C<sub>60</sub>@(**1b**)<sub>2</sub>

| Molecule | 1a       | 1b       | C <sub>60</sub> @( <b>1a</b> ) <sub>2</sub> | C <sub>70</sub> @( <b>1a</b> ) <sub>2</sub> | 3C <sub>60</sub> @( <b>1b</b> ) <sub>2</sub> |
|----------|----------|----------|---------------------------------------------|---------------------------------------------|----------------------------------------------|
| LUMO+3   | -1.39922 | -1.49391 | -2.05338                                    | -2.47489                                    | -2.93558                                     |
| LUMO+2   | -1.52085 | -1.51840 | -3.17450                                    | -2.96007                                    | -3.02729                                     |
| LUMO+1   | -1.70317 | -1.71052 | -3.20634                                    | -3.03817                                    | -3.05150                                     |
| LUMO     | -1.81936 | -1.84385 | -3.21913                                    | -3.05803                                    | -3.06919                                     |
| HOMO     | -5.19795 | -5.22054 | -5.16503                                    | -5.19006                                    | -5.22000                                     |
| HOMO-1   | -5.32340 | -5.26816 | -5.17782                                    | -5.21673                                    | -5.22081                                     |

|           |          |          |          |          |          |
|-----------|----------|----------|----------|----------|----------|
| HOMO-2    | -5.47279 | -5.49483 | -5.33374 | -5.34490 | -5.31741 |
| HOMO-3    | -5.60123 | -5.52776 | -5.35796 | -5.39932 | -5.33537 |
| HOMO-LUMO | 3.37859  | 3.37668  | 1.94590  | 2.13202  | 2.15080  |

**Table S6.** Oscillator strengths and transitions of **1a** and **1b** from DFT calculations

| $\lambda_{\text{Exp.}}$ | $\lambda_{\text{DFT}}$ | $f_{\text{osc}}$ | Transitions                                                                                                                                |
|-------------------------|------------------------|------------------|--------------------------------------------------------------------------------------------------------------------------------------------|
| <b>1a</b>               |                        |                  |                                                                                                                                            |
| 346.5                   | 380.9                  | 0.52             | HOMO-1 $\rightarrow$ LUMO (47%)                                                                                                            |
|                         | 372.9                  | 1.14             | HOMO-2 $\rightarrow$ LUMO (44%)                                                                                                            |
|                         | 367.67                 | 0.92             | HOMO $\rightarrow$ LUMO+2 (47%)                                                                                                            |
|                         | 364.8                  | 0.38             | HOMO-2 $\rightarrow$ LUMO+1 (26%)                                                                                                          |
|                         | 358.7                  | 0.52             | HOMO $\rightarrow$ LUMO+3 (23%)                                                                                                            |
|                         | 355.7                  | 0.24             | HOMO $\rightarrow$ LUMO+3 (37%)                                                                                                            |
|                         | 354.9                  | 0.57             | HOMO-5 $\rightarrow$ LUMO (23%)                                                                                                            |
|                         | 348.5                  | 0.27             | HOMO $\rightarrow$ LUMO+4 (78%)                                                                                                            |
|                         | 318.5                  | 0.36             | HOMO-2 $\rightarrow$ LUMO+5 (28%)                                                                                                          |
| <b>1b</b>               |                        |                  |                                                                                                                                            |
| 346                     | 367.67                 | 1.2357           | HOMO-1 $\rightarrow$ LUMO+1 (30%)<br>HOMO-1 $\rightarrow$ LUMO (19%)<br>HOMO-3 $\rightarrow$ LUMO (17%)<br>HOMO $\rightarrow$ LUMO+2 (15%) |
|                         | 362.12                 | 2.8321           | HOMO-2 $\rightarrow$ LUMO (26%)<br>HOMO-1 $\rightarrow$ LUMO+3 (15%)<br>HOMO-2 $\rightarrow$ LUMO+1 (12%)                                  |
|                         | 361.53                 | 1.2074           | HOMO $\rightarrow$ LUMO+1 (23%)<br>HOMO-1 $\rightarrow$ LUMO (14%)                                                                         |
|                         | 345.14                 | 0.7481           | HOMO-4 $\rightarrow$ LUMO (25%)<br>HOMO $\rightarrow$ LUMO+4 (16%)<br>HOMO-5 $\rightarrow$ LUMO (12%)                                      |

|  |        |        |                                                                         |
|--|--------|--------|-------------------------------------------------------------------------|
|  | 340.79 | 0.2570 | HOMO-3 → LUMO (28%)<br>HOMO-1 → LUMO+2 (13%)                            |
|  | 323.19 | 0.4924 | HOMO-3 → LUMO+2 (18%)<br>HOMO-2 → LUMO+3 (18%)<br>HOMO-3 → LUMO+1 (16%) |
|  | 317.37 | 0.2263 | HOMO → LUMO+5 (33%)<br>HOMO-2 → LUMO+3 (16%)                            |
|  | 308.84 | 0.2080 | HOMO-6 → LUMO (30%)<br>HOMO → LUMO+6 (26%)                              |

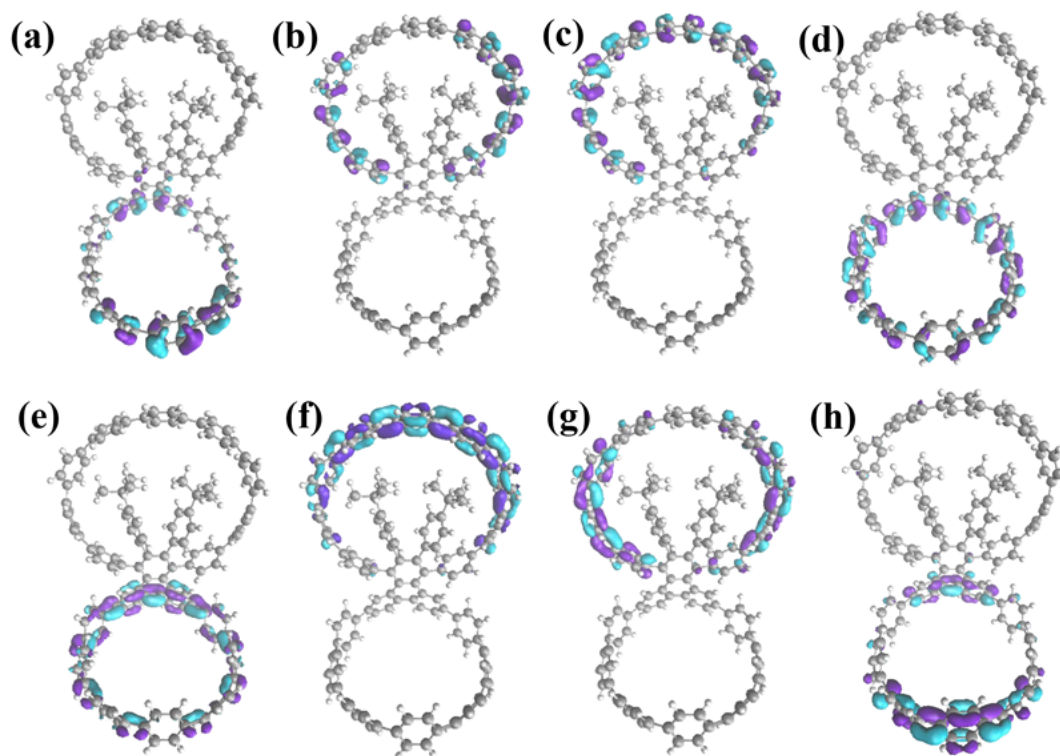

**Figure S28.** Frontier molecular orbitals of **1a**: HOMO-3 (a), HOMO-2 (b), HOMO-1 (c), HOMO (d), LUMO (e), LUMO+1 (f), LUMO+2 (g), LUMO+3 (h).

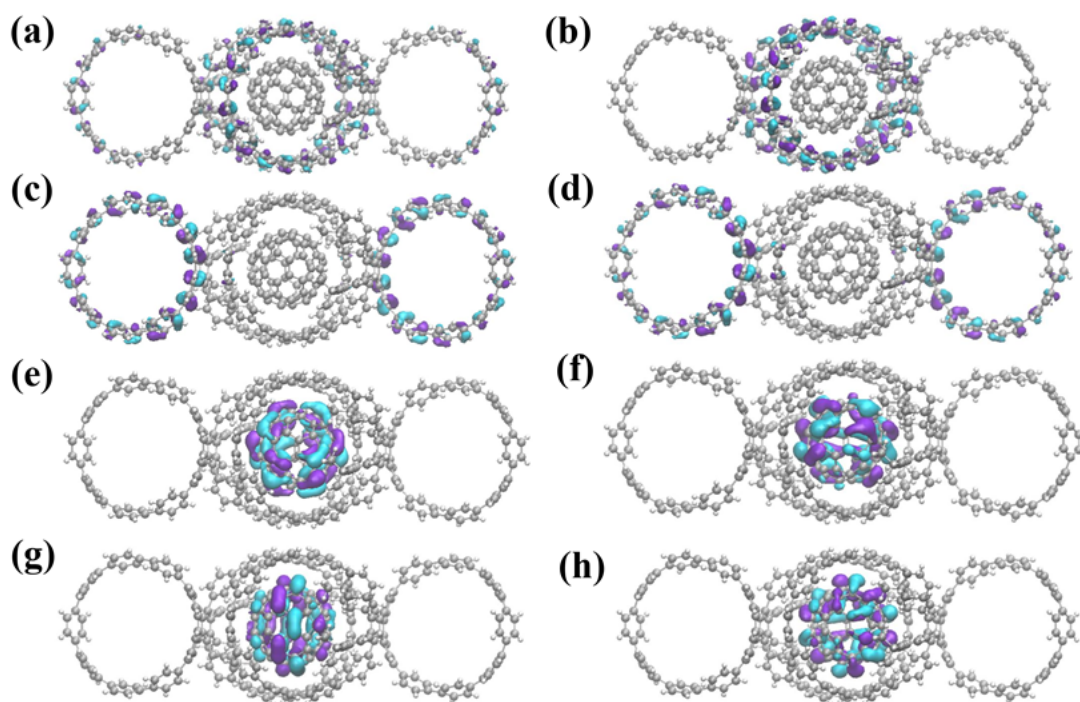

**Figure S29.** Frontier molecular orbitals of  $C_{60}@(1a)_2$ : HOMO-3 (a), HOMO-2 (b), HOMO-1 (c), HOMO (d), LUMO (e), LUMO+1 (f), LUMO+2 (g), LUMO+3 (h).

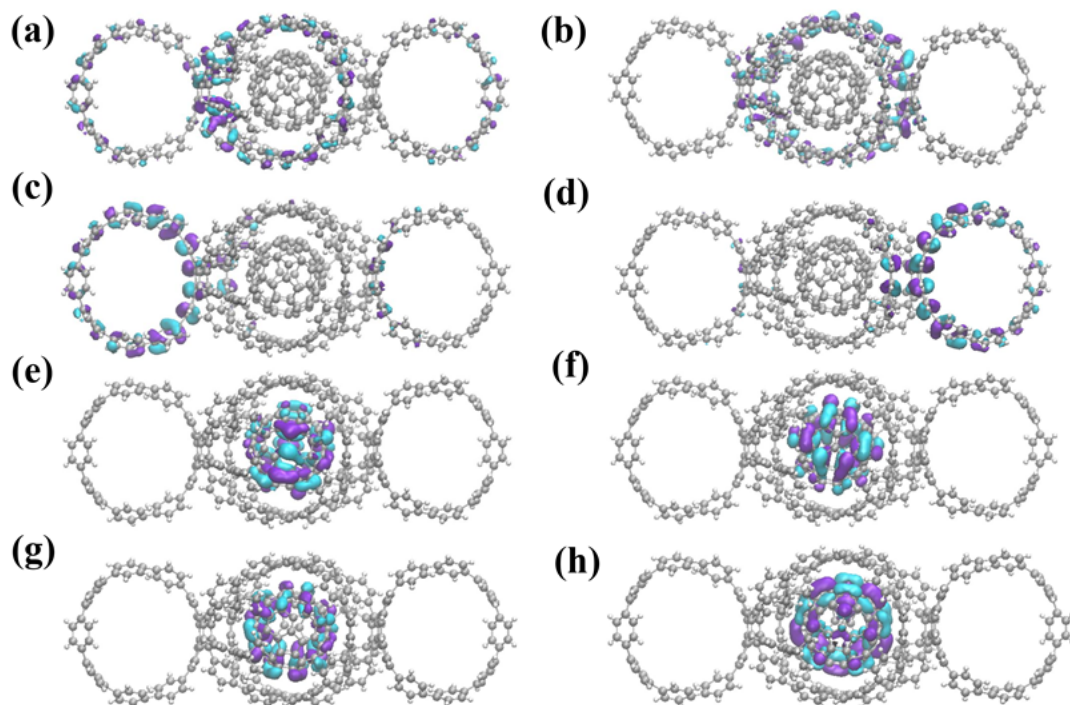

**Figure S30.** Frontier molecular orbitals of  $C_{70}@(1a)_2$ : HOMO-3 (a), HOMO-2 (b), HOMO-1 (c), HOMO (d), LUMO (e), LUMO+1 (f), LUMO+2 (g), LUMO+3 (h).

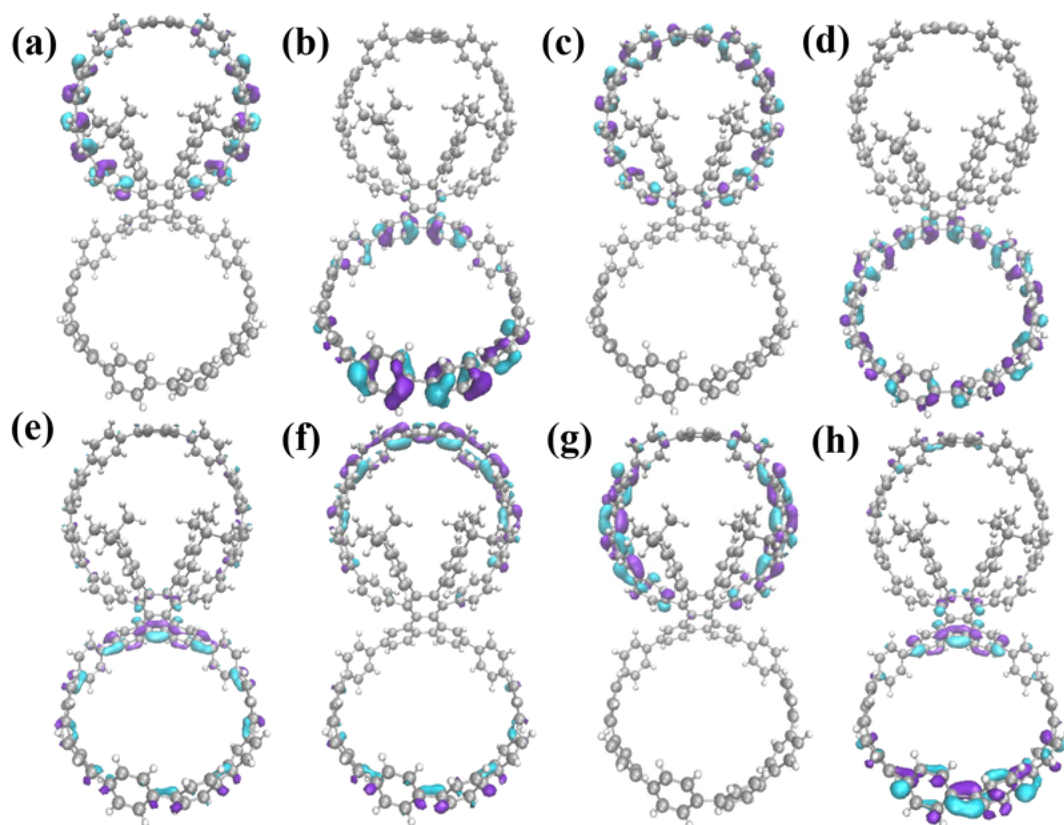

**Figure S31.** Frontier molecular orbitals of **1b**: HOMO-3 (a), HOMO-2 (b), HOMO-1 (c), HOMO (d), LUMO (e), LUMO+1 (f), LUMO+2 (g), LUMO+3 (h).

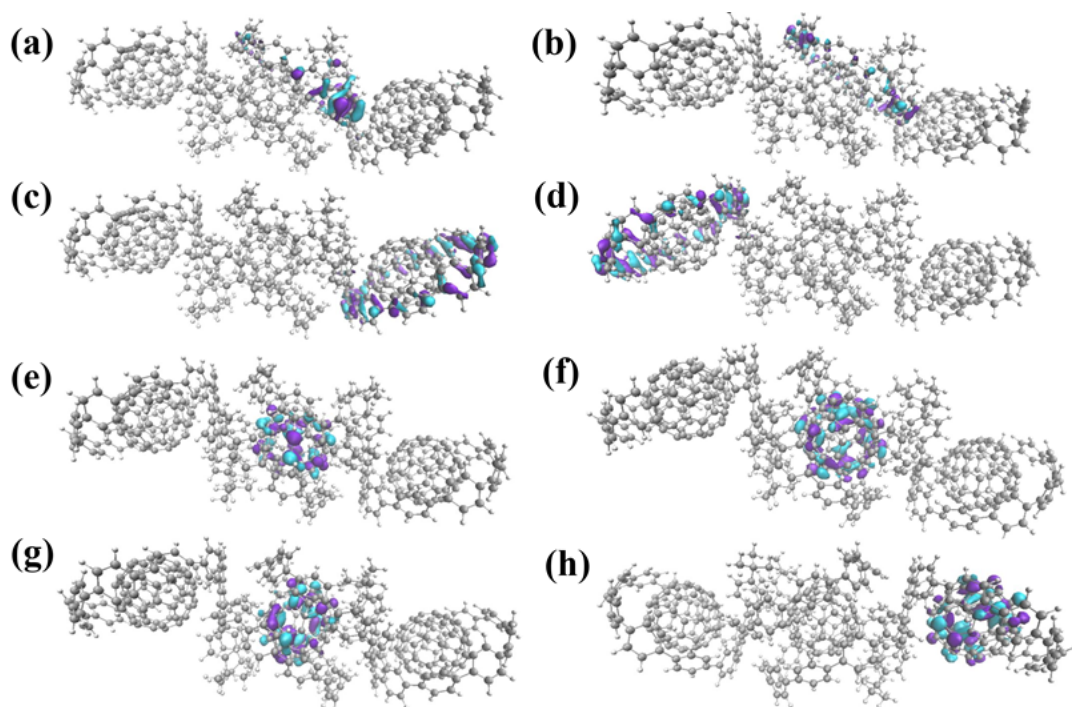

**Figure S32.** Frontier molecular orbitals of  $3C_{60}@(1b)_2$ : HOMO-3 (a), HOMO-2 (b), HOMO-1 (c), HOMO (d), LUMO (e), LUMO+1 (f), LUMO+2 (g), LUMO+3 (h).

**Table S7.** Relaxed structures of **1a**, **1b**, C<sub>60</sub>@(**1a**)<sub>2</sub>, C<sub>70</sub>@(**1a**)<sub>2</sub>, and 3C<sub>60</sub>@(**1b**)<sub>2</sub>

| <b>1a</b> |            |           |           |   |            |           |           |
|-----------|------------|-----------|-----------|---|------------|-----------|-----------|
| C         | -0.312325  | -3.856037 | -2.963445 | C | 9.704870   | -4.332325 | 4.341429  |
| C         | 0.487880   | -1.692691 | -1.966768 | C | 11.062103  | -4.042499 | 2.384923  |
| C         | -0.977164  | -5.059291 | -2.749391 | C | 8.588418   | -6.518258 | 0.025418  |
| C         | -1.629674  | 1.217387  | -0.793022 | C | 9.660445   | 5.047893  | 3.423498  |
| C         | -0.661996  | 3.119944  | -3.110937 | C | 11.451498  | 1.827785  | 4.236273  |
| C         | 0.279715   | -3.171523 | -1.895754 | C | -6.542338  | -2.268836 | 0.530609  |
| C         | 2.479076   | -1.803827 | -3.494605 | C | 4.051759   | 4.963876  | -2.890965 |
| C         | -0.484792  | -0.937154 | -1.291735 | C | 6.804417   | 4.948923  | -3.239246 |
| C         | 0.180422   | 4.703340  | -0.991430 | C | 10.296018  | -3.212217 | 4.916730  |
| C         | -10.983859 | -0.275193 | 0.826489  | C | 4.863411   | 5.736995  | -2.068267 |
| C         | -4.213118  | 7.412448  | -0.278081 | C | 12.601465  | -0.310795 | 4.051876  |
| C         | 1.482686   | 0.377293  | -2.849078 | C | 10.409615  | -0.225218 | 5.023348  |
| C         | 1.473477   | -1.042854 | -2.746792 | C | 10.261890  | 4.065755  | 4.203670  |
| C         | 0.386843   | -3.843276 | -0.671479 | C | 12.594469  | 1.073401  | 3.915538  |
| C         | 0.506927   | 1.129822  | -2.150516 | C | 5.995010   | 4.174290  | -4.060733 |
| C         | -1.629947  | -1.565069 | -0.559125 | C | 10.402653  | 1.157005  | 4.887254  |
| C         | 2.467249   | 1.001389  | -3.742016 | C | -6.173678  | 1.810309  | 1.370797  |
| C         | -0.239867  | -5.066203 | -0.470535 | C | -4.931999  | 3.779072  | 2.276072  |
| C         | 2.921852   | 2.314307  | -3.544145 | C | -5.903047  | 3.891100  | -0.016725 |
| C         | 0.294035   | 2.613440  | -2.224921 | H | -0.361449  | -3.379666 | -3.937712 |
| C         | 3.087579   | -1.224847 | -4.636656 | H | -1.549881  | -5.480106 | -3.567956 |
| C         | -10.630657 | -2.515516 | 1.851754  | H | -1.028535  | 2.486258  | -3.912083 |
| C         | 2.950497   | -3.045221 | -3.038951 | H | 0.518236   | 5.309846  | -0.156895 |
| C         | -0.916201  | 5.127794  | -1.760768 | H | -10.972727 | -0.752566 | -0.147282 |
| C         | -1.262253  | 4.353728  | -2.879672 | H | 0.887822   | -3.355844 | 0.159026  |
| C         | -5.922105  | 7.668404  | 1.566575  | H | -0.180971  | -5.519596 | 0.512071  |
| C         | -10.812519 | 1.773871  | 2.126212  | H | 2.627388   | 2.829003  | -2.645781 |

---

|   |            |           |           |   |            |           |           |
|---|------------|-----------|-----------|---|------------|-----------|-----------|
| C | -5.609250  | 7.556165  | 0.198815  | H | 2.642276   | -3.382139 | -2.061348 |
| C | -1.047465  | -5.640119 | -1.469527 | H | -2.102007  | 4.654588  | -3.497191 |
| C | -0.473576  | 0.472459  | -1.388098 | H | -5.168972  | 8.020631  | 2.264254  |
| C | -10.435063 | 3.204983  | 2.130525  | H | -1.067763  | -0.784540 | 1.361150  |
| C | -3.936569  | 2.387177  | 0.387639  | H | -2.506271  | -2.474303 | -2.301622 |
| C | -8.578656  | -6.093485 | 0.726522  | H | -2.988690  | 0.515658  | -2.303595 |
| C | -1.825175  | -1.324973 | 0.803174  | H | -11.705506 | 3.815619  | 0.497213  |
| C | -2.630087  | -2.265344 | -1.245855 | H | -8.612340  | 6.387022  | -0.873368 |
| C | 3.070268   | 0.230621  | -4.771669 | H | -10.567167 | 5.952641  | 0.115144  |
| C | -2.890880  | 1.092958  | -1.390291 | H | -11.795342 | -2.818518 | 0.059631  |
| C | -10.901401 | -1.066030 | 1.984830  | H | -4.519967  | 8.007828  | -2.333200 |
| C | -10.877426 | 4.098889  | 1.139674  | H | -2.680608  | -7.166491 | -3.140790 |
| C | 9.022580   | 5.797192  | 1.087903  | H | -7.317697  | 7.246740  | 3.131702  |
| C | -7.888020  | 6.792103  | -0.175151 | H | -4.977324  | 1.520612  | -1.293325 |
| C | -10.232199 | 5.311549  | 0.924609  | H | -8.683787  | -5.359204 | -1.297404 |
| C | -11.055151 | -3.246795 | 0.727958  | H | 1.534640   | 3.102906  | -0.534551 |
| C | -3.856595  | 7.505831  | -1.635709 | H | -0.573750  | 2.068112  | 0.871521  |
| C | -2.986806  | -7.147249 | -2.100375 | H | -4.546044  | -3.200061 | -1.172085 |
| C | -7.144037  | 7.228702  | 2.060264  | H | -10.807349 | -4.994966 | -0.484579 |
| C | -4.015811  | 1.659084  | -0.809674 | H | -3.496502  | 6.753037  | 1.646741  |
| C | -4.030264  | -2.359423 | 0.747969  | H | -2.552975  | 3.092523  | 1.883444  |
| C | -8.166614  | -6.025027 | -0.614803 | H | -6.634623  | -6.447231 | -2.040416 |
| C | 0.764497   | 3.460696  | -1.212104 | H | -10.903886 | 1.684472  | -0.024409 |
| C | -1.536799  | 1.958307  | 0.384356  | H | -1.499294  | 5.665535  | 0.796043  |
| C | -3.794834  | -2.663732 | -0.601519 | H | -9.065572  | 2.994621  | 3.782109  |
| C | -2.137874  | -6.588454 | -1.125148 | H | -6.477732  | 7.145631  | -1.733177 |
| C | 3.868762   | 2.919637  | -4.367686 | H | -10.797595 | 1.473010  | 4.262743  |
| C | -10.499735 | -4.483070 | 0.422068  | H | -4.928281  | -7.915214 | -2.573879 |
| C | -3.267012  | 6.841768  | 0.591280  | H | -8.445798  | -4.810634 | 3.096946  |

---

---

|   |            |           |           |   |            |           |           |
|---|------------|-----------|-----------|---|------------|-----------|-----------|
| C | -2.670032  | 2.534923  | 0.961718  | H | -9.406399  | -2.629625 | 3.624509  |
| C | -7.000762  | -6.647513 | -1.039172 | H | -3.125385  | -1.461240 | 2.489243  |
| C | -9.108581  | 5.680683  | 1.685451  | H | -2.494646  | 6.927502  | -3.185532 |
| C | -10.943697 | 1.110493  | 0.895367  | H | 5.004795   | -3.884615 | -5.595170 |
| C | -6.191857  | -7.363699 | -0.140225 | H | 4.333679   | -1.670573 | -6.351224 |
| C | -4.751779  | -7.499875 | -0.461138 | H | 4.270533   | 0.367337  | -6.567270 |
| C | -9.499517  | -5.049086 | 1.230792  | H | -10.885125 | -0.976677 | 4.141835  |
| C | -1.861072  | 6.157468  | -1.270844 | H | -6.151301  | -8.209076 | 1.846604  |
| C | -8.109101  | 6.664145  | 1.206348  | H | -8.213544  | -7.110780 | 2.595258  |
| C | -2.122489  | 6.224639  | 0.107238  | H | 4.918559   | 2.694093  | -6.252275 |
| C | -9.429995  | 3.654464  | 3.001490  | H | -7.925544  | 5.114774  | 3.398528  |
| C | -6.664555  | 7.227803  | -0.668131 | H | 3.040603   | -5.514774 | -1.746066 |
| C | -10.841994 | 0.989389  | 3.291610  | H | 7.283477   | 5.357624  | 2.284123  |
| C | -4.267982  | -7.582139 | -1.778629 | H | 10.485654  | 6.408190  | -0.378818 |
| C | -9.206936  | -4.399710 | 2.442201  | H | 8.878322   | 6.624191  | -2.218046 |
| C | 3.922361   | -3.775334 | -3.718886 | H | 5.686908   | 5.577135  | 0.457553  |
| C | -9.755509  | -3.157690 | 2.743265  | H | -1.932218  | -6.336204 | 1.013834  |
| C | -5.361037  | -2.752516 | 1.400899  | H | 11.278629  | 4.459779  | 0.505631  |
| C | 9.953896   | 5.166547  | 2.052962  | H | 7.949996   | -5.456294 | -2.326416 |
| C | -3.004443  | -1.706422 | 1.440833  | H | -4.141902  | -7.120055 | 1.570655  |
| C | -2.706631  | 6.890700  | -2.121283 | H | 4.475125   | -6.568368 | -0.060073 |
| C | 4.318401   | -3.301990 | -4.988846 | H | 12.332023  | 2.742235  | 1.871112  |
| C | -5.215067  | 2.964339  | 1.004702  | H | 6.527993   | -4.404164 | -4.000897 |
| C | 4.674531   | -4.812333 | -2.976596 | H | 5.743683   | -5.456717 | 1.528198  |
| C | 3.920992   | -2.050757 | -5.423674 | H | -4.769856  | -2.515398 | 3.501505  |
| C | 3.871147   | 0.908531  | -5.717027 | H | -6.508243  | -2.416075 | 3.203155  |
| C | -10.888981 | -0.399545 | 3.222354  | H | 12.361257  | -2.348731 | 2.373701  |
| C | -6.711125  | -7.597535 | 1.145590  | H | 7.333014   | -4.879816 | 3.281991  |
| C | -7.879394  | -6.972580 | 1.571305  | H | -4.591450  | -4.654844 | 2.140560  |

---

---

|   |           |           |           |   |           |           |           |
|---|-----------|-----------|-----------|---|-----------|-----------|-----------|
| C | 4.253912  | 2.224926  | -5.533639 | H | -5.336530 | -4.765852 | 0.544926  |
| C | 7.159841  | 6.050140  | -1.043228 | H | 10.551447 | -6.393499 | 0.873531  |
| C | -8.781973 | 4.864035  | 2.782848  | H | 8.949872  | -4.878483 | 4.898808  |
| C | 4.117776  | -5.504606 | -1.884503 | H | 11.326016 | -4.307432 | 1.366689  |
| C | 7.640249  | 5.687866  | 1.314334  | H | 8.951422  | -6.968019 | -0.893814 |
| C | 9.431843  | 6.231611  | -0.185720 | H | 8.901405  | 5.685688  | 3.866289  |
| C | 8.520243  | 6.354632  | -1.229033 | H | -6.501392 | -1.184707 | 0.389351  |
| C | 6.729750  | 5.812383  | 0.272892  | H | -7.493038 | -2.519317 | 1.010174  |
| C | -2.548829 | -6.723688 | 0.212446  | H | 2.975835  | 4.986075  | -2.745766 |
| C | 11.018059 | 4.395116  | 1.556635  | H | 7.881588  | 4.876675  | -3.346325 |
| C | 6.872858  | -5.520264 | -2.213961 | H | 9.991176  | -2.904022 | 5.912303  |
| C | -3.819086 | -7.176546 | 0.537326  | H | 4.405742  | 6.350841  | -1.298187 |
| C | 4.931551  | -6.102180 | -0.928167 | H | 13.473075 | -0.871319 | 3.727640  |
| C | 11.619240 | 3.415191  | 2.335700  | H | 9.517269  | -0.718622 | 5.393604  |
| C | 6.061575  | -4.919739 | -3.168166 | H | 9.960855  | 3.954053  | 5.240968  |
| C | 11.211473 | -2.424460 | 4.195903  | H | 13.460730 | 1.568656  | 3.487360  |
| C | 10.002842 | -4.712034 | 3.020222  | H | 6.462619  | 3.519166  | -4.788148 |
| C | 4.610735  | 4.087969  | -3.840948 | H | 9.505088  | 1.704272  | 5.155038  |
| C | 6.265455  | 5.672339  | -2.162469 | H | -5.712445 | 1.139654  | 2.102546  |
| C | 6.788913  | -5.714399 | 1.393654  | H | -6.436807 | 1.213396  | 0.493212  |
| C | 11.183585 | 3.160937  | 3.646979  | H | -4.261131 | 4.616807  | 2.069367  |
| C | -5.526526 | -2.144224 | 2.803031  | H | -4.486605 | 3.161978  | 3.063222  |
| C | 7.225344  | -6.194171 | 0.147518  | H | -6.813922 | 4.315110  | 0.411526  |
| C | 11.652950 | -2.924805 | 2.959529  | H | -6.180947 | 3.352739  | -0.927260 |
| C | 6.333402  | -6.039669 | -1.025499 | H | -7.102242 | 2.204617  | 1.796922  |
| C | 7.695376  | -5.386174 | 2.393662  | H | -5.868583 | 4.191376  | 2.660647  |
| C | 9.079210  | -5.524950 | 2.194063  | H | -5.242642 | 4.713923  | -0.299530 |
| C | -5.415521 | -4.286288 | 1.521634  | H | -5.465659 | -1.051975 | 2.778663  |
| C | 9.495750  | -6.191686 | 1.027696  | H | -6.358106 | -4.605009 | 1.972559  |

---

|                                    |           |           |           |   |            |           |           |
|------------------------------------|-----------|-----------|-----------|---|------------|-----------|-----------|
| C                                  | 11.465719 | -0.999602 | 4.514597  | H | -6.539020  | -2.740020 | -0.455756 |
| <hr/>                              |           |           |           |   |            |           |           |
| C <sub>60</sub> @(1a) <sub>2</sub> |           |           |           |   |            |           |           |
| C                                  | 7.422181  | 2.792427  | 0.738721  | C | -7.403608  | 1.139493  | -4.636681 |
| C                                  | 9.732780  | 3.204938  | -2.670492 | C | -19.780074 | -0.744083 | -2.012358 |
| C                                  | 8.406738  | 0.638163  | -0.222011 | C | -18.865017 | -4.153228 | 1.076538  |
| C                                  | 8.386038  | -0.776038 | -0.149991 | C | -19.497230 | -3.692371 | -1.583290 |
| C                                  | 8.792958  | -0.928786 | -2.604667 | C | -18.240438 | -4.936543 | 0.091490  |
| C                                  | 8.796357  | -1.541909 | -1.327313 | C | -20.404607 | -1.412975 | -0.946359 |
| C                                  | 7.584541  | -0.654318 | 2.153608  | C | -18.655392 | -4.744809 | -1.238761 |
| C                                  | 7.720890  | 3.840700  | 1.618364  | C | -19.961601 | -2.787164 | -0.612167 |
| C                                  | 6.319279  | 2.944338  | -0.113962 | C | -6.620996  | 1.458976  | -5.748723 |
| C                                  | 8.797902  | 0.527494  | -2.682113 | C | -15.444485 | 6.693215  | 1.480451  |
| C                                  | 9.321699  | 2.581234  | -1.496274 | C | -21.193025 | -0.638583 | -0.076333 |
| C                                  | 13.000335 | 5.823627  | -1.905431 | C | -14.337004 | 6.342112  | 0.687796  |
| C                                  | 6.729653  | -4.794239 | 2.241145  | C | -5.295422  | 1.882962  | -5.608380 |
| C                                  | 3.979168  | -5.495151 | 3.279191  | C | -19.778540 | 0.642859  | -2.087527 |
| C                                  | 10.667729 | 4.348613  | -2.569686 | C | -2.817283  | -1.328322 | 1.717971  |
| C                                  | 7.959356  | 1.404662  | 0.884988  | C | -16.742358 | 6.426679  | 1.057246  |
| C                                  | 8.811809  | 1.272035  | -1.476390 | C | -20.401537 | 1.424407  | -1.100198 |
| C                                  | 5.568547  | -4.941165 | 1.468206  | C | 1.963454   | -2.677582 | -1.269485 |
| C                                  | 7.892565  | -1.418654 | 1.015263  | C | -14.598327 | 5.903208  | -0.620979 |
| C                                  | 7.615391  | -3.745275 | 2.004865  | C | -19.706340 | -3.103138 | 0.732741  |
| C                                  | 6.833467  | 4.902178  | 1.782971  | C | -2.522166  | -2.312764 | -0.946651 |
| C                                  | 10.688798 | 5.204545  | -1.452594 | C | -16.988215 | 5.796135  | -0.175881 |
| C                                  | 5.424431  | -4.123399 | 0.334483  | C | -21.191568 | 0.750299  | -0.151668 |
| C                                  | 7.359905  | -2.812780 | 0.992082  | C | -3.539414  | -3.583327 | -6.429124 |
| C                                  | 9.303439  | -2.846408 | -1.204242 | C | -0.431471  | -3.095625 | -1.694372 |
| C                                  | 7.642309  | 0.761768  | 2.091811  | C | -1.626494  | -2.367788 | -2.093410 |
| C                                  | 9.021147  | -1.755116 | -3.727841 | C | -15.894339 | 5.635483  | -1.042814 |

---

|   |           |           |           |   |            |           |           |
|---|-----------|-----------|-----------|---|------------|-----------|-----------|
| C | 10.655250 | -4.717825 | -2.077897 | C | -5.582849  | -5.000817 | -6.687643 |
| C | 5.657624  | 1.728552  | 3.229545  | C | -3.267253  | -1.160798 | -0.700453 |
| C | 6.308433  | -3.079748 | 0.101442  | C | 0.818687   | -2.697127 | -2.169012 |
| C | 7.775963  | 2.033511  | 4.300522  | C | -18.230608 | 5.035461  | -0.448771 |
| C | 9.464793  | 2.537773  | -3.888560 | C | -3.239043  | 1.189924  | -0.787492 |
| C | 11.759718 | 4.411826  | -3.450354 | C | -19.489320 | 3.619686  | -1.979631 |
| C | 7.037547  | 1.533306  | 3.225282  | C | -2.028626  | -2.526208 | 1.464721  |
| C | 5.638558  | 4.957361  | 1.051906  | C | 1.809806   | -3.059029 | 0.065844  |
| C | 4.474505  | 5.761397  | 1.488093  | C | 0.930311   | -1.552497 | -3.063057 |
| C | 15.456994 | 6.376054  | -2.192528 | C | -19.700061 | 3.284854  | 0.386457  |
| C | 9.720455  | -3.591898 | -2.303077 | C | -3.409482  | 0.795668  | 0.602464  |
| C | 4.388032  | -5.692396 | 1.950412  | C | -19.955729 | 2.825773  | -0.916479 |
| C | 12.901267 | 5.133278  | -3.124804 | C | -18.856847 | 4.364411  | 0.614964  |
| C | 11.832876 | 5.924787  | -1.126841 | C | -0.215177  | -0.853100 | -3.446099 |
| C | 3.613975  | 6.415136  | 0.594253  | C | -1.885051  | -3.008474 | 0.161428  |
| C | 1.791044  | -6.453014 | 2.807162  | C | -3.151422  | -0.017729 | -1.590393 |
| C | 9.024819  | 1.228071  | -3.887778 | C | -18.645551 | 4.701653  | -1.750648 |
| C | 6.886014  | -1.231800 | 3.345634  | C | 2.161827   | 0.570724  | -2.770050 |
| C | 5.745093  | 2.863761  | 5.374262  | C | 2.144401   | -0.824686 | -2.718887 |
| C | 2.352287  | 6.842944  | 0.998236  | C | 0.504569   | -3.472704 | 0.561100  |
| C | 0.358797  | -6.488709 | 3.176627  | C | -1.519661  | -1.269078 | -2.950030 |
| C | -2.257713 | -5.673212 | 3.919559  | C | -4.349862  | 2.102412  | -6.793765 |
| C | 3.522978  | -6.393763 | 1.096745  | C | -5.060457  | 1.936308  | -8.145621 |
| C | 4.075742  | 5.662566  | 2.830387  | C | -3.739526  | 3.518491  | -6.730003 |
| C | 5.019658  | 2.376877  | 4.281003  | C | -3.216045  | 1.054628  | -6.702745 |
| C | 5.444146  | 4.011149  | 0.032831  | C | 3.426254   | 0.663704  | -0.652582 |
| C | -3.399568 | -4.810425 | 4.293496  | C | 2.521259   | 2.315858  | 0.950083  |
| C | 0.469760  | 6.704199  | 2.684519  | C | 1.625581   | 2.370872  | 2.096839  |
| C | 14.611465 | 5.819586  | -0.017415 | C | -0.966887  | -1.297946 | 3.171415  |

---

---

|   |           |           |           |   |            |           |           |
|---|-----------|-----------|-----------|---|------------|-----------|-----------|
| C | 9.457742  | -3.058421 | -3.586514 | C | -0.819576  | 2.700232  | 2.172456  |
| C | 2.813187  | 6.080309  | 3.230222  | C | 1.567264   | -2.245319 | 2.266440  |
| C | 7.138409  | 2.689765  | 5.350659  | C | 3.238172   | -1.186837 | 0.790935  |
| C | 2.706948  | -5.863742 | 3.695251  | C | 2.027747   | 2.529311  | -1.461299 |
| C | -3.310773 | 5.176377  | 3.934410  | C | -1.810693  | 3.062121  | -0.062416 |
| C | 1.898842  | 6.621059  | 2.310027  | C | 2.464287   | -2.298632 | 1.119865  |
| C | 2.251288  | -6.772320 | 1.517848  | C | 0.355142   | -2.970966 | 1.921195  |
| C | -1.349853 | -6.161694 | 4.876866  | C | 1.884159   | 3.011572  | -0.158005 |
| C | 11.748110 | -4.876131 | -2.945521 | C | 2.302172   | 0.073073  | 2.697788  |
| C | -5.106069 | -2.574209 | 4.660186  | C | 2.781159   | -1.521527 | -1.609604 |
| C | -5.354666 | -3.508583 | 3.640237  | C | 1.518750   | 1.272164  | 2.953463  |
| C | -4.439741 | 4.941101  | 3.129225  | C | -0.884161  | -2.507441 | 2.364359  |
| C | 10.675079 | -5.448126 | -0.874898 | H | -8.590665  | -3.771742 | -2.259777 |
| C | 5.584065  | -1.726493 | 3.199492  | H | -6.080477  | -2.151041 | 0.809754  |
| C | -0.068464 | -6.557918 | 4.514329  | H | -9.516357  | -3.068666 | 0.549236  |
| C | 17.000814 | 5.661150  | -0.449821 | H | -6.891595  | 5.448225  | -3.091457 |
| C | -1.892211 | -5.789295 | 2.570157  | H | -4.622673  | 4.939669  | -3.952295 |
| C | -5.606776 | 1.633906  | 4.540963  | H | -8.443467  | 3.578285  | -2.686117 |
| C | 0.052005  | 6.874590  | 4.015962  | H | -7.025745  | -5.650013 | -2.547496 |
| C | -5.629786 | -1.191999 | 4.641828  | H | -9.824995  | -5.250091 | 0.790945  |
| C | 16.754833 | 6.154813  | -1.743803 | H | -4.543058  | 4.216740  | 0.288737  |
| C | -0.612849 | -6.190900 | 2.209750  | H | -9.492598  | 3.226197  | 0.211419  |
| C | -5.774197 | -0.430314 | 5.813456  | H | -8.911110  | 1.342924  | 4.724977  |
| C | 14.349582 | 6.114467  | -1.365874 | H | -5.075841  | -1.363826 | -2.397164 |
| C | 12.888895 | -5.558877 | -2.543084 | H | -6.110204  | 2.378687  | 0.700264  |
| C | -5.676703 | 0.871419  | 3.366114  | H | -8.852464  | -1.899814 | -4.319957 |
| C | 15.907399 | 5.597153  | 0.430118  | H | -9.677465  | -3.033306 | 4.830770  |
| C | -0.512357 | 6.354733  | 1.745722  | H | -11.777126 | -3.777036 | 4.324354  |
| C | -4.087243 | -2.867698 | 5.580831  | H | -15.295413 | -6.692375 | 3.215215  |

---

---

|   |           |           |           |   |            |           |           |
|---|-----------|-----------|-----------|---|------------|-----------|-----------|
| C | -5.763054 | 0.960033  | 5.763813  | H | -13.778340 | -5.041283 | 3.751429  |
| C | -4.516270 | -4.606101 | 3.463034  | H | -11.842551 | -6.521986 | 0.214664  |
| C | -4.023587 | 3.336736  | 5.352588  | H | -3.923163  | -6.564596 | 0.434667  |
| C | -5.297773 | 3.874492  | 3.385305  | H | -8.906859  | -0.719379 | 4.834423  |
| C | -1.796615 | 6.003254  | 2.139335  | H | -1.698150  | -7.320350 | -0.274219 |
| C | 5.070566  | 3.549643  | 6.568692  | H | -3.839989  | 6.618879  | -0.081167 |
| C | 12.986586 | -6.113532 | -1.256193 | H | -4.713393  | -5.137630 | -3.531280 |
| C | -5.057053 | 3.004014  | 4.462056  | H | -3.942654  | -2.490132 | -4.238648 |
| C | -5.688609 | -0.514001 | 3.415777  | H | -4.533512  | -4.036146 | 0.555649  |
| C | -2.156041 | 5.989828  | 3.495349  | H | -13.781454 | -5.617972 | -0.657335 |
| C | -3.251774 | -3.959267 | 5.400622  | H | -9.675131  | 3.645075  | 4.472316  |
| C | -3.168531 | 4.396835  | 5.093681  | H | -2.488276  | -5.882727 | -4.246761 |
| C | 4.808715  | -2.043568 | 4.302981  | H | -7.740515  | -3.059741 | -6.174915 |
| C | 11.818537 | -6.129354 | -0.472156 | H | -2.384570  | 5.594135  | -4.692513 |
| C | -1.233819 | 6.527156  | 4.411694  | H | -1.599698  | 7.289835  | -0.821463 |
| C | 5.415490  | 2.775751  | 7.859735  | H | 1.628482   | 6.176213  | -5.924482 |
| C | 7.404655  | -1.139579 | 4.637196  | H | -11.768885 | 4.331771  | 3.886244  |
| C | 19.781158 | 0.740086  | 2.007990  | H | 6.178052   | 3.354688  | -2.952545 |
| C | 18.866093 | 4.148408  | -1.081817 | H | 4.627213   | -5.565599 | -2.263104 |
| C | 19.499071 | 3.688308  | 1.577960  | H | -9.813591  | 5.417998  | 0.217079  |
| C | 18.242095 | 4.932272  | -0.096837 | H | -5.170464  | 1.845998  | -2.208099 |
| C | 20.405531 | 1.408405  | 0.941539  | H | -0.631220  | 6.874366  | -5.283831 |
| C | 18.657445 | 4.740885  | 1.233342  | H | 2.555267   | 5.427258  | -1.797733 |
| C | 19.962829 | 2.782608  | 0.607004  | H | -0.755118  | -7.230110 | -4.757647 |
| C | 6.621966  | -1.458614 | 5.749322  | H | -17.583268 | -6.304289 | 2.423498  |
| C | 15.442380 | -6.697409 | -1.480536 | H | 0.324160   | 6.127538  | -1.168969 |
| C | 21.193430 | 0.633465  | 0.071532  | H | 5.813768   | 0.935577  | -6.775801 |
| C | 14.335258 | -6.345704 | -0.687647 | H | -13.769305 | 5.527678  | 3.179623  |
| C | 5.296183  | -1.881989 | 5.609116  | H | 5.575062   | -1.356455 | -2.406531 |

---

---

|   |           |           |           |   |            |           |           |
|---|-----------|-----------|-----------|---|------------|-----------|-----------|
| C | 19.779250 | -0.646828 | 2.083672  | H | -16.053167 | -5.228261 | -1.443063 |
| C | 2.816411  | 1.331414  | -1.714539 | H | 0.234146   | -6.205771 | -0.710987 |
| C | 16.740465 | -6.431056 | -1.057868 | H | 3.863796   | 2.162280  | -6.370110 |
| C | 20.401697 | -1.428921 | 1.096427  | H | 5.794090   | -1.524915 | -6.687443 |
| C | -1.964336 | 2.680681  | 1.272918  | H | 4.703523   | 5.287803  | -2.636207 |
| C | 14.597135 | -5.906372 | 0.620873  | H | 3.807428   | -2.671874 | -6.183612 |
| C | 19.707205 | 3.098178  | -0.737930 | H | 6.135841   | -3.684411 | -2.718662 |
| C | 16.986903 | -5.800103 | 0.174934  | H | 2.473966   | -5.590971 | -1.397232 |
| C | 21.191599 | -0.755389 | 0.147380  | H | 5.599232   | 1.078632  | -2.494636 |
| C | 3.539426  | 3.583100  | 6.426601  | H | 2.393910   | 4.081889  | -6.054710 |
| C | 0.430577  | 3.098712  | 1.697799  | H | 2.304381   | -4.537942 | -5.729572 |
| C | 15.893360 | -5.638830 | 1.042173  | H | -3.795312  | 2.393646  | -4.137195 |
| C | 5.582357  | 5.001180  | 6.686067  | H | -11.830772 | 6.619976  | -0.494201 |
| C | 3.266300  | 1.163884  | 0.703899  | H | 1.512103   | -6.615156 | -5.456383 |
| C | 18.229586 | -5.039647 | 0.447113  | H | -5.071324  | -1.738529 | -7.793604 |
| C | 1.488179  | -1.083735 | 3.039018  | H | -6.493180  | -2.757481 | -8.047142 |
| C | 0.195796  | -0.600167 | 3.502624  | H | -8.412913  | 0.769435  | -4.783494 |
| C | 19.489187 | -3.623617 | 1.977005  | H | -19.165348 | -1.306319 | -2.707241 |
| C | -0.931199 | 1.555598  | 3.066503  | H | -18.575137 | -4.271922 | 2.115072  |
| C | 19.699215 | -3.289745 | -0.389283 | H | -19.742415 | -3.529490 | -2.628476 |
| C | 3.408637  | -0.792581 | -0.599032 | H | -18.259150 | -5.384694 | -2.021398 |
| C | 19.955446 | -2.830234 | 0.913391  | H | -7.054510  | 1.338990  | -6.734322 |
| C | 18.855640 | -4.369168 | -0.617091 | H | -15.284128 | 7.114300  | 2.468395  |
| C | 0.214282  | 0.856189  | 3.449542  | H | -21.758584 | -1.126545 | 0.711731  |
| C | 0.590579  | 3.494204  | 0.304349  | H | -19.162637 | 1.125346  | -2.839001 |
| C | 3.150504  | 0.020817  | 1.593839  | H | -17.572328 | 6.645947  | 1.722108  |
| C | 18.645056 | -4.705450 | 1.748721  | H | -13.770286 | 5.626399  | -1.264910 |
| C | -2.162709 | -0.567635 | 2.773485  | H | -20.049958 | -2.431650 | 1.512368  |
| C | -2.145278 | 0.827778  | 2.722322  | H | -21.756107 | 1.321781  | 0.578881  |

---

---

|   |            |           |           |   |            |           |           |
|---|------------|-----------|-----------|---|------------|-----------|-----------|
| C | -0.505451  | 3.475782  | -0.557678 | H | -3.115886  | -2.575745 | -6.370530 |
| C | 4.350698   | -2.101267 | 6.794597  | H | -3.099663  | -4.080368 | -7.299249 |
| C | 3.216989   | -1.053359 | 6.703735  | H | -16.042278 | 5.156700  | -2.004935 |
| C | 3.740165   | -3.517268 | 6.730856  | H | -5.131141  | -5.498459 | -7.552745 |
| C | 5.061453   | -1.935288 | 8.146382  | H | -6.669067  | -5.035268 | -6.809526 |
| C | 0.966003   | 1.301026  | -3.167978 | H | -19.734539 | 3.345196  | -3.001191 |
| C | -1.568154  | 2.248402  | -2.263011 | H | -20.045105 | 2.702299  | 1.234021  |
| C | -1.489076  | 1.086815  | -3.035585 | H | -18.567017 | 4.594246  | 1.634691  |
| C | -0.196690  | 0.603250  | -3.499187 | H | -18.247869 | 5.252303  | -2.597765 |
| C | -2.465170  | 2.301720  | -1.116434 | H | -5.466251  | 0.927020  | -8.266549 |
| C | -0.356027  | 2.974036  | -1.917769 | H | -4.351112  | 2.107964  | -8.961027 |
| C | -2.303077  | -0.069993 | -2.694346 | H | -3.057061  | 3.678533  | -7.571743 |
| C | -0.591468  | -3.491121 | -0.300929 | H | -3.170841  | 3.668566  | -5.808644 |
| C | -2.782011  | 1.524613  | 1.613028  | H | -2.635608  | 1.172115  | -5.783357 |
| C | 0.883278   | 2.510517  | -2.360930 | H | -2.530674  | 1.153552  | -7.551858 |
| C | -7.420705  | -2.793645 | -0.739263 | H | -4.933715  | -3.241234 | -8.727597 |
| C | -9.732373  | -3.207728 | 2.668736  | H | -3.224373  | -4.132322 | -5.537048 |
| C | -8.405847  | -0.639772 | 0.221737  | H | -5.328616  | -5.578392 | -5.793138 |
| C | -8.385669  | 0.774464  | 0.150155  | H | 8.593283   | 3.771443  | 2.257766  |
| C | -8.793562  | 0.926224  | 2.604747  | H | 6.080122   | 2.148203  | -0.807910 |
| C | -8.796728  | 1.539782  | 1.327592  | H | 9.517566   | 3.066707  | -0.550858 |
| C | -7.583364  | 0.653675  | -2.153217 | H | 6.890153   | -5.448730 | 3.092220  |
| C | -7.718780  | -3.841399 | -1.619740 | H | 4.620772   | -4.938235 | 3.953505  |
| C | -6.318646  | -2.946259 | 0.114414  | H | 8.443043   | -3.579705 | 2.686387  |
| C | -8.798068  | -0.530084 | 2.681703  | H | 7.028438   | 5.649813  | 2.545594  |
| C | -9.320969  | -2.583501 | 1.494911  | H | 9.826556   | 5.247997  | -0.793504 |
| C | -12.999013 | -5.826957 | 1.901554  | H | 4.540956   | -4.215417 | -0.286828 |
| C | -6.731012  | 4.793902  | -2.240269 | H | 9.491951   | -3.228186 | -0.210766 |
| C | -3.981160  | 5.496528  | -3.277849 | H | 8.909689   | -1.346269 | -4.724790 |

---

---

|   |            |           |           |   |           |           |           |
|---|------------|-----------|-----------|---|-----------|-----------|-----------|
| C | -10.667024 | -4.351578 | 2.567163  | H | 5.078500  | 1.362629  | 2.395888  |
| C | -7.957753  | -1.405818 | -0.885283 | H | 6.109076  | -2.378341 | -0.698926 |
| C | -8.811318  | -1.274194 | 1.475712  | H | 8.853882  | 1.900448  | 4.320213  |
| C | -5.570257  | 4.941571  | -1.466927 | H | 9.677032  | 3.029718  | -4.832437 |
| C | -7.892171  | 1.417609  | -1.014802 | H | 11.777061 | 3.773148  | -4.327058 |
| C | -7.616187  | 3.744403  | -2.004278 | H | 15.296547 | 6.687896  | -3.220183 |
| C | -6.831313  | -4.902846 | -1.784278 | H | 13.778806 | 5.037079  | -3.755296 |
| C | -10.687482 | -5.207101 | 1.449746  | H | 11.844642 | 6.519577  | -0.218394 |
| C | -5.426167  | 4.124073  | -0.333004 | H | 3.923885  | 6.562292  | -0.435250 |
| C | -7.360488  | 2.812105  | -0.991361 | H | 8.905864  | 0.715976  | -4.834937 |
| C | -9.304255  | 2.844134  | 1.204816  | H | 1.700013  | 7.319895  | 0.274577  |
| C | -7.640399  | -0.762448 | -2.091791 | H | 3.838091  | -6.618556 | 0.082860  |
| C | -9.022405  | 1.752077  | 3.728132  | H | 4.716459  | 5.138571  | 3.531379  |
| C | -10.656971 | 4.714799  | 2.078674  | H | 3.943883  | 2.489656  | 4.236558  |
| C | -5.655748  | -1.729009 | -3.230586 | H | 4.533785  | 4.033929  | -0.554571 |
| C | -6.309614  | 3.079883  | -0.100264 | H | 13.783583 | 5.615349  | 0.653270  |
| C | -7.774564  | -2.033113 | -4.300814 | H | 9.672985  | -3.648591 | -4.471580 |
| C | -9.464974  | -2.540965 | 3.887156  | H | 2.492067  | 5.884791  | 4.247658  |
| C | -11.759309 | -4.415388 | 3.447422  | H | 7.740788  | 3.060777  | 6.174261  |
| C | -7.035629  | -1.533478 | -3.225626 | H | 2.382337  | -5.591866 | 4.693686  |
| C | -5.636960  | -4.958459 | -1.052363 | H | 1.597600  | -7.288826 | 0.823171  |
| C | -4.472475  | -5.761975 | -1.488327 | H | -1.631115 | -6.172686 | 5.925191  |
| C | -15.455605 | -6.380213 | 2.187617  | H | 11.766678 | -4.335795 | -3.885979 |
| C | -9.721879  | 3.589102  | 2.303776  | H | -6.180063 | -3.350737 | 2.953489  |
| C | -4.389950  | 5.693228  | -1.948962 | H | -4.624696 | 5.569771  | 2.264164  |
| C | -12.900556 | -5.137019 | 3.121208  | H | 9.812271  | -5.420104 | -0.215778 |
| C | -11.831258 | -5.927523 | 1.123331  | H | 5.170847  | -1.844902 | 2.208864  |
| C | -3.612342  | -6.416156 | -0.594399 | H | 0.628459  | -6.871932 | 5.285072  |
| C | -1.793195  | 6.454736  | -2.805767 | H | -2.556646 | -5.423591 | 1.798150  |

---

---

|   |            |           |           |   |           |           |           |
|---|------------|-----------|-----------|---|-----------|-----------|-----------|
| C | -9.025278  | -1.231165 | 3.887030  | H | 0.758816  | 7.229968  | 4.759271  |
| C | -6.885087  | 1.231818  | -3.345071 | H | 17.584552 | 6.299391  | -2.429110 |
| C | -5.744409  | -2.863480 | -5.375724 | H | -0.325757 | -6.125111 | 1.169949  |
| C | -2.350209  | -6.843139 | -0.997910 | H | -5.814750 | -0.931312 | 6.776007  |
| C | -0.361033  | 6.491001  | -3.175473 | H | 13.766968 | -5.532048 | -3.179591 |
| C | 2.255727   | 5.676748  | -3.919027 | H | -5.575547 | 1.361344  | 2.407203  |
| C | -3.524922  | 6.394477  | -1.095158 | H | 16.055443 | 5.225228  | 1.438361  |
| C | -4.072941  | -5.661978 | -2.830303 | H | -0.232252 | 6.209683  | 0.712037  |
| C | -5.018430  | -2.377097 | -4.282626 | H | -3.864103 | -2.157181 | 6.369484  |
| C | -5.443408  | -4.012965 | -0.032448 | H | -5.794203 | 1.529181  | 6.688097  |
| C | 3.397949   | 4.814530  | -4.293149 | H | -4.705850 | -5.284223 | 2.637302  |
| C | -0.466858  | -6.702552 | -2.683269 | H | -3.806933 | 2.674983  | 6.184298  |
| C | -14.609503 | -5.822703 | 0.012993  | H | -6.134460 | 3.689397  | 2.719296  |
| C | -9.459394  | 3.055282  | 3.587117  | H | -2.472189 | 5.595700  | 1.398333  |
| C | -2.810036  | -6.079054 | -3.229677 | H | -5.600077 | -1.073611 | 2.494715  |
| C | -7.137670  | -2.689135 | -5.351470 | H | -2.394597 | -4.077149 | 6.054252  |
| C | -2.709089  | 5.865575  | -3.693933 | H | -2.302635 | 4.540096  | 5.730553  |
| C | 3.312936   | -5.173203 | -3.933309 | H | 3.795632  | -2.391821 | 4.138090  |
| C | -1.896103  | -6.620137 | -2.309280 | H | 11.829331 | -6.622427 | 0.495275  |
| C | -2.253350  | 6.773434  | -1.516258 | H | -1.508551 | 6.615976  | 5.458061  |
| C | 1.347457   | 6.164933  | -4.876097 | H | 8.414159  | -0.770009 | 4.783901  |
| C | -11.750170 | 4.872454  | 2.945988  | H | 19.166827 | 1.302755  | 2.702871  |
| C | 5.104926   | 2.578722  | -4.660056 | H | 18.575894 | 4.266819  | -2.120294 |
| C | 5.352996   | 3.512751  | -3.639656 | H | 19.744563 | 3.525725  | 2.623121  |
| C | 4.441812   | -4.937146 | -3.128223 | H | 18.261673 | 5.381177  | 2.015884  |
| C | -10.676623 | 5.445523  | 0.875927  | H | 7.055626  | -1.338811 | 6.734879  |
| C | -5.583470  | 1.727319  | -3.198781 | H | 15.281581 | -7.118828 | -2.468267 |
| C | 0.065966   | 6.560542  | -4.513250 | H | 21.758865 | 1.120973  | -0.716902 |
| C | -16.999049 | -5.665158 | 0.444638  | H | 19.163460 | -1.128862 | 2.835530  |

---

---

|   |            |           |           |   |           |           |           |
|---|------------|-----------|-----------|---|-----------|-----------|-----------|
| C | 1.890406   | 5.792550  | -2.569553 | H | 17.570155 | -6.650798 | -1.722923 |
| C | 5.606583   | -1.629362 | -4.540319 | H | 13.769385 | -5.629093 | 1.264974  |
| C | -0.048676  | -6.873702 | -4.014477 | H | 20.050350 | 2.426304  | -1.517433 |
| C | 5.628684   | 1.196544  | -4.641660 | H | 21.755729 | -1.327303 | -0.583147 |
| C | -16.753359 | -6.159210 | 1.738527  | H | 16.041746 | -5.159717 | 2.004060  |
| C | 0.610944   | 6.193521  | -2.208838 | H | 19.734825 | -3.348801 | 2.998376  |
| C | 5.773292   | 0.434736  | -5.813166 | H | 20.044125 | -2.707605 | -1.237186 |
| C | -14.347992 | -6.117993 | 1.361434  | H | 18.565403 | -4.599316 | -1.636631 |
| C | -12.891028 | 5.555002  | 2.543419  | H | 18.247517 | -5.255671 | 2.596183  |
| C | 5.676049   | -0.866674 | -3.365559 | H | 2.636411  | -1.170762 | 5.784430  |
| C | -15.905353 | -5.600505 | -0.434903 | H | 3.629992  | -0.039555 | 6.707657  |
| C | 0.514693   | -6.351583 | -1.744460 | H | 2.531722  | -1.152228 | 7.552936  |
| C | 4.086517   | 2.872490  | -5.581063 | H | 4.522065  | -4.282359 | 6.775134  |
| C | 5.762645   | -0.955606 | -5.763268 | H | 3.171368  | -3.667226 | 5.809544  |
| C | 4.514376   | 4.610048  | -3.462342 | H | 3.057763  | -3.677248 | 7.572659  |
| C | 4.024541   | -3.333355 | -5.351803 | H | 5.467465  | -0.926082 | 8.267256  |
| C | 5.299154   | -3.870045 | -3.384502 | H | 5.882393  | -2.650308 | 8.261243  |
| C | 1.798836   | -5.999596 | -2.138043 | H | 4.352149  | -2.106790 | 8.961857  |
| C | -5.070604  | -3.549414 | -6.570519 | H | 4.932732  | 3.241478  | 8.725719  |
| C | -12.988455 | 6.110103  | 1.256700  | H | 6.492708  | 2.758279  | 8.046028  |
| C | 5.057765   | -2.999816 | -4.461315 | H | 5.071357  | 1.738792  | 7.791848  |
| C | 5.687587   | 0.518728  | -3.415515 | H | 3.116213  | 2.575388  | 6.367985  |
| C | 2.158626   | -5.987104 | -3.493969 | H | 3.224611  | 4.131817  | 5.534282  |
| C | 3.250815   | 3.963874  | -5.400748 | H | 3.099142  | 4.080152  | 7.296451  |
| C | 3.170188   | -4.393995 | -5.092729 | H | 5.328301  | 5.578778  | 5.791532  |
| C | -3.427135  | -0.660612 | 0.656023  | H | 6.668520  | 5.035931  | 6.808355  |
| C | -4.808188  | 2.044849  | -4.302198 | H | 5.130199  | 5.498633  | 7.551042  |
| C | -11.820152 | 6.126554  | 0.473054  | H | -5.881534 | 2.651160  | -8.260544 |
| C | 1.237018   | -6.525729 | -4.410158 | H | -4.521529 | 4.283473  | -6.774392 |

---

|                                    |           |           |           |   |           |           |           |
|------------------------------------|-----------|-----------|-----------|---|-----------|-----------|-----------|
| C                                  | -5.415880 | -2.775361 | -7.861361 | H | -3.628952 | 0.040780  | -6.706696 |
| C <sub>70</sub> @(1a) <sub>2</sub> |           |           |           |   |           |           |           |
| C                                  | -6.343235 | -3.059075 | 0.013524  | C | 1.931282  | 6.623499  | -2.605364 |
| C                                  | -7.968368 | -1.497793 | 1.016804  | C | -3.344972 | 5.254098  | -4.021211 |
| C                                  | -5.441841 | -4.100948 | 0.180408  | C | 4.369376  | -5.621545 | -1.600231 |
| C                                  | -7.058669 | 1.336030  | 3.335472  | C | -2.242959 | -5.568326 | -3.676541 |
| C                                  | -6.421664 | 2.882719  | 0.066017  | C | 3.922947  | -5.200711 | -2.863230 |
| C                                  | -7.402019 | -2.876665 | 0.917561  | C | -3.993566 | -2.672239 | -5.267511 |
| C                                  | -8.797477 | -1.507804 | -1.353368 | C | -0.637412 | -6.181016 | -1.960217 |
| C                                  | -7.671193 | -0.791762 | 2.192779  | C | -5.800424 | -0.393645 | -5.671641 |
| C                                  | -6.813936 | 4.736282  | 2.097038  | C | 2.415565  | 6.915474  | -1.316994 |
| C                                  | 5.650120  | -0.592176 | 3.356409  | C | -3.239442 | 4.417922  | -5.146240 |
| C                                  | -1.862638 | 6.411142  | 2.469805  | C | 9.514221  | 3.534082  | 2.633343  |
| C                                  | -8.482077 | 0.616874  | -0.119612 | C | -4.109593 | 3.358526  | -5.340001 |
| C                                  | -8.443225 | -0.798498 | -0.122938 | C | 5.057724  | 2.054363  | -6.929482 |
| C                                  | -7.623040 | -3.850940 | 1.897652  | C | 17.852503 | -5.096313 | 0.231822  |
| C                                  | -8.055884 | 1.328540  | 1.031873  | C | 7.176273  | 1.321209  | -5.650464 |
| C                                  | -6.948140 | -1.411303 | 3.347997  | C | 3.550389  | -6.472840 | -0.846937 |
| C                                  | -8.857353 | 1.315467  | -1.348679 | C | 9.252237  | 2.971496  | 3.905874  |
| C                                  | -6.712897 | -4.893432 | 2.072140  | C | 5.354029  | -3.385108 | -6.565611 |
| C                                  | -9.353005 | 2.629143  | -1.301581 | C | 10.437828 | 4.680315  | 2.435490  |
| C                                  | -7.500558 | 2.716042  | 0.945867  | C | 8.844120  | 1.655839  | 4.016444  |
| C                                  | -8.786085 | -0.824255 | -2.595478 | C | 8.821578  | -1.325103 | 4.141837  |
| C                                  | 5.033333  | -2.682709 | 4.520698  | C | -5.808991 | 0.996917  | -5.670637 |
| C                                  | -9.254782 | -2.835571 | -1.308586 | C | 0.077627  | 6.786037  | -4.312669 |
| C                                  | -5.663810 | 4.817810  | 1.301131  | C | -1.229171 | 6.465891  | -4.654347 |
| C                                  | -5.522401 | 3.925218  | 0.227774  | C | 9.208419  | -2.651714 | 4.143821  |
| C                                  | 0.006976  | 6.757953  | 4.119573  | C | 13.981704 | -6.304303 | 1.524948  |
| C                                  | 5.602199  | 1.514151  | 4.552911  | C | -3.142338 | -3.746012 | -5.072318 |

---

|   |            |           |           |   |           |           |           |
|---|------------|-----------|-----------|---|-----------|-----------|-----------|
| C | -0.423647  | 6.560625  | 2.795656  | C | 10.422516 | 5.450532  | 1.257187  |
| C | -5.569985  | -4.985091 | 1.264914  | C | 15.498659 | -5.686566 | -0.271776 |
| C | -7.725824  | 0.625661  | 2.197921  | C | 16.392126 | -6.391934 | 1.849539  |
| C | 5.073700   | 2.898121  | 4.507146  | C | 15.100038 | -6.621904 | 2.316342  |
| C | -5.637995  | 2.531843  | 5.465458  | C | 14.210043 | -5.916337 | 0.193552  |
| C | 2.275665   | -5.823736 | 3.615344  | C | 4.049603  | 5.519876  | -3.088467 |
| C | -7.410634  | -1.294487 | 4.658734  | C | 18.432689 | -4.288368 | 1.224658  |
| C | -5.658204  | -1.913577 | 3.140241  | C | 12.698552 | 5.463439  | 2.856858  |
| C | -8.819372  | 0.636953  | -2.592935 | C | 2.794389  | 5.955007  | -3.493965 |
| C | -5.673780  | 1.472213  | 3.280756  | C | 11.561057 | 6.137351  | 0.843950  |
| C | 5.581979   | -1.305641 | 4.558972  | C | 19.268530 | -3.231482 | 0.886781  |
| C | 5.370608   | 3.805201  | 3.474950  | C | 11.563697 | 4.776513  | 3.269856  |
| C | -16.924596 | 5.562552  | 0.049123  | C | 19.603098 | 2.681476  | -0.696734 |
| C | 1.841674   | 5.908692  | 2.207200  | C | 17.936598 | 4.917295  | -0.194794 |
| C | 4.527579   | 4.888525  | 3.223018  | C | 10.362274 | -4.501266 | 2.825995  |
| C | 5.398929   | -3.646550 | 3.567408  | C | 12.646671 | -6.010833 | 2.110918  |
| C | -2.417223  | 6.796333  | 1.239149  | C | 14.309138 | 5.795456  | -0.305895 |
| C | -3.551179  | -6.478477 | 0.835934  | C | 19.556704 | -2.940266 | -0.457428 |
| C | 1.311158   | 6.454113  | 4.491632  | C | 5.865310  | 1.733466  | -8.203661 |
| C | -4.972329  | 2.054905  | 4.330576  | C | 14.088685 | 6.298987  | 0.987582  |
| C | -5.264396  | -2.040535 | 5.536536  | C | 19.320076 | 3.090312  | 0.617599  |
| C | 1.933425   | -5.928930 | 2.260860  | C | 12.749088 | 6.080482  | 1.595450  |
| C | -7.734941  | 3.704332  | 1.909053  | C | 15.593243 | 5.504284  | -0.748919 |
| C | -7.740472  | 1.822345  | 4.452571  | C | 16.707083 | 5.705852  | 0.083934  |
| C | -4.831288  | -2.213481 | 4.212400  | C | 4.548147  | 3.514398  | -7.014591 |
| C | -4.362856  | -5.731765 | 1.702387  | C | 16.500430 | 6.371142  | 1.305767  |
| C | -9.728999  | 3.317478  | -2.449815 | C | 20.019526 | 1.270564  | -0.912472 |
| C | 4.576095   | -4.749759 | 3.327230  | C | 18.355631 | 4.610227  | -1.501701 |
| C | -2.653775  | 5.652931  | 3.350948  | C | 18.502774 | 4.186328  | 0.863637  |

---

---

|   |            |           |           |   |           |           |           |
|---|------------|-----------|-----------|---|-----------|-----------|-----------|
| C | -7.037692  | 2.418772  | 5.498240  | C | 15.212938 | 6.662751  | 1.750194  |
| C | 0.654318   | -6.330827 | 1.883679  | C | 18.275290 | -4.908511 | -1.096288 |
| C | 3.371379   | 5.097452  | 3.995518  | C | 19.996311 | -1.559875 | -0.791996 |
| C | 5.656785   | 0.792805  | 3.353147  | C | 3.849038  | 1.082859  | -6.857519 |
| C | -0.325110  | -6.623215 | 2.843206  | C | 10.332322 | -5.368140 | 1.717202  |
| C | -1.763018  | -6.530939 | 2.488737  | C | 12.607879 | -5.288390 | 3.315479  |
| C | 3.373007   | -4.917331 | 4.033324  | C | 19.174332 | 3.510592  | -1.748527 |
| C | -4.454666  | 5.565646  | 1.730473  | C | 11.457558 | -6.108910 | 1.365343  |
| C | 2.223702   | 5.929621  | 3.556463  | C | 20.844164 | 0.581617  | -0.005296 |
| C | -3.928365  | 5.238623  | 2.990276  | C | 19.314340 | 0.513326  | -1.863297 |
| C | 3.989567   | 3.182259  | 5.353214  | C | 19.112561 | -3.848138 | -1.435249 |
| C | 0.538854   | 6.222416  | 1.834871  | C | 20.832732 | -0.809961 | 0.053946  |
| C | 5.718549   | 0.802296  | 5.759268  | C | 11.486170 | -4.547758 | 3.667206  |
| C | -2.271968  | -6.878990 | 1.225913  | C | 19.302961 | -0.874695 | -1.804228 |
| C | 3.066030   | -3.997828 | 5.051872  | C | 5.893725  | -2.676574 | -7.833505 |
| C | -9.609038  | -3.533721 | -2.458001 | C | 5.714470  | -4.891102 | -6.601905 |
| C | 3.880183   | -2.904220 | 5.291364  | C | 3.814940  | -3.247979 | -6.554751 |
| C | -4.269124  | -2.250599 | 6.684964  | H | 6.047885  | 2.266354  | 0.791335  |
| C | -18.149208 | 4.782005  | 0.368969  | H | 4.512227  | 4.139724  | 0.370722  |
| C | -6.579977  | -1.607620 | 5.737765  | H | 6.017687  | -2.184878 | 0.911423  |
| C | -3.697223  | 6.375319  | 0.873383  | H | 6.959825  | -5.570338 | -2.560172 |
| C | -9.359954  | -2.917661 | -3.707833 | H | -5.813381 | 1.511727  | -2.330568 |
| C | -4.883274  | 3.148073  | 6.651126  | H | 8.555152  | 3.567593  | -2.422572 |
| C | -10.510268 | -4.703987 | -2.303963 | H | 7.021306  | 5.458285  | -2.852320 |
| C | -8.974342  | -1.591031 | -3.768807 | H | 9.319978  | -3.163999 | 0.801883  |
| C | -9.037757  | 1.397168  | -3.764476 | H | 9.365038  | 3.196753  | 0.532766  |
| C | 5.703591   | -0.591126 | 5.762374  | H | 4.422994  | -4.020805 | 0.532777  |
| C | 0.083726   | -6.708171 | 4.187945  | H | 0.712326  | -6.598040 | -5.038032 |
| C | 1.361991   | -6.320455 | 4.565582  | H | 8.804538  | 0.562747  | -4.470158 |

---

---

|   |            |           |           |   |           |           |           |
|---|------------|-----------|-----------|---|-----------|-----------|-----------|
| C | -9.466318  | 2.709818  | -3.700908 | H | 5.431212  | 2.025870  | -2.280217 |
| C | -14.313710 | 6.124660  | -0.895136 | H | 5.212332  | -1.164499 | -2.416033 |
| C | 3.155372   | 4.259021  | 5.102539  | H | -6.292361 | -3.352486 | -2.861622 |
| C | -10.472120 | -5.524695 | -1.160958 | H | -2.616044 | -5.490141 | -1.555548 |
| C | -15.805221 | 5.401822  | 0.883450  | H | -4.779494 | -5.266092 | -2.515499 |
| C | -16.727463 | 6.174365  | -1.201902 | H | -6.131287 | 3.821084  | -2.653071 |
| C | -15.443653 | 6.450494  | -1.666396 | H | 1.653851  | -7.471700 | -0.703308 |
| C | -14.524803 | 5.677907  | 0.420531  | H | 4.006703  | 6.670662  | 0.103996  |
| C | -3.891346  | -5.466468 | 2.998265  | H | -1.552938 | -5.897519 | -5.695060 |
| C | -18.718680 | 4.004305  | -0.653787 | H | 4.145421  | -2.185678 | -4.367446 |
| C | -12.758019 | -5.512242 | -2.746658 | H | -2.483685 | 6.002022  | -1.540372 |
| C | -2.614346  | -5.851806 | 3.379252  | H | 8.588342  | -3.768687 | -2.119702 |
| C | -11.593967 | -6.252205 | -0.772352 | H | 9.070837  | -2.036492 | -4.016116 |
| C | -19.528857 | 2.915851  | -0.356138 | H | 4.308970  | 2.582560  | -4.375841 |
| C | -11.639817 | -4.784844 | -3.135035 | H | -4.586835 | 5.692516  | -2.305531 |
| C | -19.710840 | -3.063240 | 0.968522  | H | 2.287164  | -5.115740 | -4.237780 |
| C | -17.991094 | -5.229969 | 0.355748  | H | 8.020927  | -3.130716 | -5.960661 |
| C | -10.662206 | 4.462232  | -2.293285 | H | -0.214057 | 6.611295  | -0.948409 |
| C | -12.976804 | 5.884467  | -1.500704 | H | -5.802888 | -0.929132 | -2.325021 |
| C | -14.342042 | -6.021682 | 0.405971  | H | 4.536611  | -4.507785 | -3.425489 |
| C | -19.801080 | 2.561541  | 0.976191  | H | -3.727087 | -1.903821 | -5.981492 |
| C | -4.942410  | -2.136074 | 8.068279  | H | -0.374307 | -6.182503 | -0.913101 |
| C | -14.118277 | -6.461808 | -0.909843 | H | -5.784204 | -0.932182 | -6.612206 |
| C | -19.427751 | -3.405530 | -0.364690 | H | 1.798180  | 7.467568  | -0.618885 |
| C | -12.787627 | -6.186261 | -1.514070 | H | -2.384620 | 4.514031  | -5.801881 |
| C | -15.629763 | -5.781720 | 0.868717  | H | -3.913201 | 2.656760  | -6.140177 |
| C | -16.744028 | -5.973251 | 0.034079  | H | 7.676399  | 1.097997  | -6.582693 |
| C | -3.609192  | -3.647106 | 6.567293  | H | 3.896264  | -6.837799 | 0.112848  |
| C | -16.529615 | -6.577678 | -1.217672 | H | 9.438720  | 3.555401  | 4.799233  |

---

---

|   |            |           |           |   |           |           |           |
|---|------------|-----------|-----------|---|-----------|-----------|-----------|
| C | -20.160824 | -1.674349 | 1.249919  | H | 8.713078  | 1.226445  | 4.999484  |
| C | -18.407746 | -4.992695 | 1.677865  | H | 8.692293  | -0.813476 | 5.084935  |
| C | -18.584294 | -4.467661 | -0.665080 | H | -5.805920 | 1.534530  | -6.611682 |
| C | -15.238487 | -6.817631 | -1.682015 | H | 0.794088  | 7.003838  | -5.095468 |
| C | -18.558676 | 4.528902  | 1.690403  | H | -1.511468 | 6.443988  | -5.699729 |
| C | -20.206555 | 1.158269  | 1.253959  | H | 9.383246  | -3.161457 | 5.083710  |
| C | -3.179022  | -1.153056 | 6.577524  | H | -2.222280 | -3.799533 | -5.638879 |
| C | -10.644189 | 5.284137  | -1.150672 | H | 9.539509  | 5.445438  | 0.627298  |
| C | -12.931210 | 5.210619  | -2.732886 | H | 15.638714 | -5.247541 | -1.251869 |
| C | -19.252662 | -3.927050 | 1.979212  | H | 17.238703 | -6.580911 | 2.499694  |
| C | -11.784296 | 5.981938  | -0.760622 | H | 14.951406 | -6.986594 | 3.326313  |
| C | -21.009069 | -0.966651 | 0.379705  | H | 13.364811 | -5.652240 | -0.429942 |
| C | -19.466972 | -0.942627 | 2.228658  | H | 4.656968  | 4.919332  | -3.755270 |
| C | -19.370175 | 3.436813  | 1.989016  | H | 18.110854 | -4.403396 | 2.252282  |
| C | -21.031567 | 0.426048  | 0.381700  | H | 13.603950 | 5.396475  | 3.447342  |
| C | -11.794773 | 4.512820  | -3.122572 | H | 2.434643  | 5.677909  | -4.476903 |
| C | -19.489394 | 0.446519  | 2.230629  | H | 11.554214 | 6.665752  | -0.102585 |
| C | -5.233067  | 2.357879  | 7.937645  | H | 19.586654 | -2.538706 | 1.656055  |
| C | -5.306938  | 4.629646  | 6.807390  | H | 11.602640 | 4.185635  | 4.176618  |
| C | -3.352007  | 3.090662  | 6.453630  | H | 13.459009 | 5.494492  | -0.905566 |
| C | 1.008843   | -2.689042 | -2.545288 | H | 5.234290  | 1.901554  | -9.082963 |
| C | -1.903645  | -3.054623 | -0.266104 | H | 6.184089  | 0.685410  | -8.207270 |
| C | 0.236423   | -3.266313 | -1.507279 | H | 19.626236 | 2.459726  | 1.443165  |
| C | 3.398150   | -0.472973 | 0.909481  | H | 15.724843 | 4.981349  | -1.688152 |
| C | -0.893874  | 2.073697  | 2.892281  | H | 5.394146  | 4.208809  | -7.052596 |
| C | 1.121122   | 2.767887  | 1.918289  | H | 3.930283  | 3.764007  | -6.145828 |
| C | -1.222145  | -3.367059 | 0.985822  | H | 17.350662 | 6.599580  | 1.938252  |
| C | -1.841989  | -2.588796 | 2.053737  | H | 17.984695 | 5.199874  | -2.332231 |
| C | 1.236345   | 3.556765  | -0.364263 | H | 18.183152 | 4.393551  | 1.877403  |

---

---

|   |           |           |           |   |           |           |           |
|---|-----------|-----------|-----------|---|-----------|-----------|-----------|
| C | 0.176588  | 1.293129  | 3.506947  | H | 15.071338 | 7.114486  | 2.725394  |
| C | 3.147704  | 0.870367  | 1.363501  | H | 17.893311 | -5.560013 | -1.873920 |
| C | 2.158925  | -2.854578 | 0.016560  | H | 3.214319  | 1.314923  | -5.998678 |
| C | 3.503700  | 0.319524  | -1.364289 | H | 4.205355  | 0.052725  | -6.751753 |
| C | -1.218025 | -3.042620 | -1.506900 | H | 9.449612  | -5.399522 | 1.087705  |
| C | -2.328473 | 0.071870  | 2.943367  | H | 13.514425 | -5.188498 | 3.899502  |
| C | 2.647820  | 2.404687  | -2.007361 | H | 19.433970 | 3.253332  | -2.769070 |
| C | -0.301239 | 2.983904  | 1.919117  | H | 11.440484 | -6.715456 | 0.467003  |
| C | 1.878511  | 2.913175  | 0.727955  | H | 21.448558 | 1.143709  | 0.697422  |
| C | -0.187399 | 3.760084  | -0.364417 | H | 18.660383 | 1.021137  | -2.561437 |
| C | -2.888883 | -1.787614 | 1.435722  | H | 19.375436 | -3.682799 | -2.473832 |
| C | -0.658714 | 3.662269  | -1.742258 | H | 21.428296 | -1.320130 | 0.802337  |
| C | 1.426512  | 1.724258  | 2.892527  | H | 11.536428 | -3.883101 | 4.520776  |
| C | -1.793426 | -2.268448 | -2.545169 | H | 18.640286 | -1.429173 | -2.457198 |
| C | 2.932453  | 1.925833  | 0.441748  | H | 5.660842  | -1.607295 | -7.791280 |
| C | -3.123383 | -0.497131 | 1.869085  | H | 5.430802  | -3.106379 | -8.729165 |
| C | 2.822183  | -1.393393 | 1.882592  | H | 5.326299  | -5.390594 | -5.707576 |
| C | 2.793766  | -2.023786 | -0.941433 | H | 6.799727  | -5.029610 | -6.633132 |
| C | 0.145812  | -3.555027 | 0.985503  | H | 3.513009  | -2.195801 | -6.521305 |
| C | 1.656928  | 3.330112  | -1.742185 | H | 3.376114  | -3.765593 | -5.695444 |
| C | 0.891490  | -3.472224 | -0.265007 | H | -6.167351 | -2.307749 | -0.743851 |
| C | 3.434527  | -0.782056 | -0.474352 | H | -4.558423 | -4.144363 | -0.440717 |
| C | -1.309975 | -0.678218 | 3.524906  | H | -6.236764 | 2.117123  | -0.670550 |
| C | 2.417480  | 0.796138  | 2.622661  | H | -6.944707 | 5.432515  | 2.916824  |
| C | 3.042677  | 0.216007  | -2.741910 | H | 5.560887  | -1.123944 | 2.422779  |
| C | -2.109871 | 1.474780  | 2.613471  | H | -8.439332 | -3.724618 | 2.597504  |
| C | 1.026918  | -1.029228 | 3.534985  | H | -6.837777 | -5.586158 | 2.895836  |
| C | -0.932313 | 1.929165  | -3.986239 | H | -9.555863 | 3.066779  | -0.336398 |
| C | -0.022483 | -0.051064 | 3.815605  | H | -9.447358 | -3.279722 | -0.344298 |

---

---

|   |           |           |           |   |           |           |           |
|---|-----------|-----------|-----------|---|-----------|-----------|-----------|
| C | 2.513078  | 1.507759  | -3.146640 | H | -4.633861 | 3.963155  | -0.385888 |
| C | 0.383198  | -1.962930 | -3.648144 | H | -0.704251 | 7.094328  | 4.864942  |
| C | -0.988027 | 3.343874  | 0.729194  | H | -8.405119 | -0.908177 | 4.841559  |
| C | 2.222370  | -0.610350 | 2.956804  | H | -5.297809 | -2.044292 | 2.133246  |
| C | -1.061030 | -2.044940 | 3.072439  | H | -5.144987 | 1.113982  | 2.413112  |
| C | 3.258890  | 1.660523  | -0.912440 | H | 6.238884  | 3.639868  | 2.847850  |
| C | -2.664949 | -0.188937 | -3.188169 | H | 2.511394  | 5.495065  | 1.466786  |
| C | -2.932230 | -2.089989 | 0.013135  | H | 4.747939  | 5.551565  | 2.394374  |
| C | -0.679200 | 0.565190  | -4.444098 | H | 6.306472  | -3.514135 | 2.990530  |
| C | 2.437997  | -0.946310 | -3.177240 | H | -1.839144 | 7.413431  | 0.561623  |
| C | -2.825212 | -1.307099 | -2.266397 | H | -3.916833 | -6.732312 | -0.152156 |
| C | 2.273337  | -2.066460 | -2.260296 | H | 1.611809  | 6.555053  | 5.527857  |
| C | -1.531971 | -0.467943 | -4.058762 | H | -3.897867 | 2.123104  | 4.253271  |
| C | -3.561713 | 0.263409  | -0.478926 | H | 2.606572  | -5.550327 | 1.503409  |
| C | -3.308807 | 1.336261  | -1.371007 | H | -8.574464 | 3.606541  | 2.583306  |
| C | 0.485133  | 3.414359  | -2.606617 | H | -8.819087 | 1.725140  | 4.505494  |
| C | 1.402711  | 1.580926  | -3.981296 | H | -3.823870 | -2.552350 | 4.009933  |
| C | -3.306522 | -1.113328 | -0.945450 | H | 4.853306  | -5.461721 | 2.558666  |
| C | -2.900622 | 1.100696  | -2.751554 | H | -2.221045 | 5.309738  | 4.282606  |
| C | 0.969409  | -3.003904 | 2.055133  | H | -7.585510 | 2.786236  | 6.358082  |
| C | 0.354972  | 2.558620  | -3.698647 | H | 0.374265  | -6.261610 | 0.844193  |
| C | 2.215074  | -2.557232 | 1.445347  | H | 5.568578  | 1.321046  | 2.416900  |
| C | 1.279277  | -0.887374 | -4.058187 | H | -4.489993 | 4.567606  | 3.628350  |
| C | -2.021050 | 2.185130  | -3.158909 | H | 3.728928  | 2.473083  | 6.128773  |
| C | 0.385903  | -2.262501 | 3.076731  | H | 0.226100  | 6.032736  | 0.819532  |
| C | -0.983871 | -1.755161 | -3.644429 | H | 5.740114  | 1.344881  | 6.697561  |
| C | -3.420475 | 0.549873  | 0.903186  | H | -1.658662 | -7.446405 | 0.536533  |
| C | -1.876976 | 3.072534  | -2.013479 | H | 2.119731  | -4.083668 | 5.570022  |
| C | -2.674974 | 2.544483  | -0.916398 | H | 3.566868  | -2.142929 | 5.994656  |

---

---

|   |           |           |           |   |            |           |           |
|---|-----------|-----------|-----------|---|------------|-----------|-----------|
| C | -2.797544 | 1.765137  | 1.360382  | H | -6.959859  | -1.473409 | 6.741018  |
| C | 0.764781  | 0.348885  | -4.443070 | H | -4.108908  | 6.662584  | -0.087390 |
| C | -2.286106 | 2.711237  | 0.439579  | H | -9.539748  | -3.469407 | -4.622787 |
| C | 6.287912  | 2.998551  | 0.034867  | H | -8.856978  | -1.120144 | -4.734770 |
| C | 7.949977  | 1.384280  | -0.799951 | H | -8.901305  | 0.933991  | -4.731835 |
| C | 5.425395  | 4.058490  | -0.202950 | H | 5.710341   | -1.131413 | 6.702174  |
| C | 7.203029  | -1.525205 | -3.083318 | H | -0.627667  | -7.023943 | 4.941825  |
| C | 6.249904  | -2.960095 | 0.197522  | H | 1.641183   | -6.332942 | 5.612494  |
| C | 7.398710  | 2.774515  | -0.792702 | H | -9.665020  | 3.257013  | -4.614659 |
| C | 8.672943  | 1.478340  | 1.605213  | H | 2.252045   | 4.379236  | 5.686517  |
| C | 7.738200  | 0.634519  | -1.965653 | H | -9.584743  | -5.530186 | -0.537293 |
| C | 6.774693  | -4.859794 | -1.763497 | H | -15.929433 | 4.920118  | 1.845462  |
| C | -5.852495 | 0.987199  | -3.269789 | H | -17.582144 | 6.371876  | -1.838782 |
| C | 1.793915  | -6.329643 | -2.528825 | H | -15.309324 | 6.859236  | -2.661391 |
| C | 8.343678  | -0.692135 | 0.454833  | H | -13.670007 | 5.406809  | 1.027789  |
| C | 8.337401  | 0.723762  | 0.397017  | H | -4.494817  | -4.857792 | 3.659911  |
| C | 7.699643  | 3.723292  | -1.777919 | H | -18.406519 | 4.169708  | -1.677509 |
| C | 7.974960  | -1.443475 | -0.692471 | H | -13.668484 | -5.437531 | -3.328344 |
| C | 7.190206  | 1.227405  | -3.223830 | H | -2.230688  | -5.535335 | 4.340840  |
| C | 8.661561  | -1.347330 | 1.723073  | H | -11.570438 | -6.822138 | 0.149476  |
| C | 6.826279  | 4.783272  | -2.027549 | H | -19.836941 | 2.249313  | -1.152212 |
| C | 9.116652  | -2.677617 | 1.742792  | H | -11.696318 | -4.155027 | -4.014269 |
| C | 7.393634  | -2.820972 | -0.602370 | H | -13.495343 | -5.727567 | 1.013850  |
| C | 8.641484  | 0.846995  | 2.873896  | H | -5.746522  | -2.871930 | 8.177746  |
| C | -5.134094 | 3.076925  | -4.419982 | H | -5.354382  | -1.132260 | 8.219110  |
| C | 9.153876  | 2.796295  | 1.511715  | H | -19.756588 | -2.746961 | -1.159093 |
| C | 5.561566  | -4.908844 | -1.064791 | H | -15.767598 | -5.304699 | 1.831195  |
| C | 5.352210  | -3.997075 | -0.018080 | H | -4.371681  | -4.432411 | 6.607663  |
| C | -0.018423 | -6.357814 | -4.274906 | H | -2.903564  | -3.795003 | 7.392776  |

---

---

|   |           |           |           |   |            |           |           |
|---|-----------|-----------|-----------|---|------------|-----------|-----------|
| C | -5.704748 | -1.113305 | -4.465012 | H | -17.378328 | -6.798381 | -1.854909 |
| C | 0.363497  | -6.384410 | -2.920180 | H | -18.015302 | -5.608980 | 2.478635  |
| C | 5.641817  | 4.923009  | -1.289080 | H | -18.267471 | -4.621014 | -1.689252 |
| C | 7.762629  | -0.783446 | -1.909062 | H | -15.092584 | -7.221699 | -2.677293 |
| C | -5.110538 | -2.472439 | -4.438925 | H | -18.185556 | 5.155058  | 2.492762  |
| C | 5.994396  | -2.748808 | -5.325391 | H | -2.454693  | -1.259491 | 7.393970  |
| C | -2.170105 | 6.093420  | -3.671383 | H | -3.641681  | -0.162649 | 6.636353  |
| C | 7.822995  | 1.018148  | -4.450398 | H | -9.756120  | 5.313490  | -0.528657 |
| C | 5.927290  | 1.832705  | -3.218946 | H | -13.840255 | 5.111577  | -3.313154 |
| C | 8.633608  | -0.612462 | 2.935008  | H | -19.510855 | -3.722453 | 3.011960  |
| C | 5.817757  | -1.597352 | -3.195061 | H | -11.774447 | 6.552833  | 0.160889  |
| C | -5.716365 | 1.712086  | -4.461544 | H | -21.605114 | -1.511959 | -0.343086 |
| C | -5.403643 | -3.451114 | -3.473545 | H | -18.795517 | -1.464422 | 2.899339  |
| C | 16.609519 | -5.836466 | 0.575825  | H | -19.621926 | 3.221749  | 3.021232  |
| C | -1.919523 | -5.781453 | -2.328864 | H | -21.644907 | 0.953894  | -0.339587 |
| C | -4.545985 | -4.536946 | -3.282273 | H | -11.835771 | 3.881455  | -4.001538 |
| C | -5.319429 | 3.976265  | -3.354179 | H | -18.835061 | 0.987799  | 2.902793  |
| C | 2.280000  | -6.826893 | -1.308062 | H | -6.304878  | 2.409592  | 8.150973  |
| C | 3.668946  | 6.466694  | -0.905314 | H | -4.687110  | 2.772972  | 8.792604  |
| C | -1.296356 | -5.961196 | -4.644469 | H | -4.787971  | 5.081954  | 7.660475  |
| C | 5.222010  | -2.188347 | -4.303452 | H | -6.385889  | 4.709545  | 6.972741  |
| C | 5.886223  | 1.861081  | -5.653886 | H | -3.010190  | 2.056421  | 6.342595  |
| C | -1.800243 | 6.278912  | -2.331077 | H | -2.861026  | 3.526238  | 7.330440  |
| C | 7.692788  | -3.837734 | -1.518412 | H | -4.195843  | -2.318442 | 8.848654  |
| C | 7.990331  | -2.088276 | -4.090569 | H | -3.058775  | -3.740500 | 5.626134  |
| C | 5.299230  | 2.152711  | -4.413565 | H | -2.649454  | -1.221958 | 5.624591  |
| C | 4.487158  | 5.723702  | -1.769848 | H | -4.955260  | 1.305819  | 7.815408  |
| C | 9.461118  | -3.324552 | 2.924078  | H | -5.052701  | 5.190607  | 5.901677  |
| C | -4.439721 | 5.042660  | -3.160050 | H | -3.041299  | 3.657789  | 5.570437  |

---

|           |            |           |           |   |            |           |           |
|-----------|------------|-----------|-----------|---|------------|-----------|-----------|
| C         | 2.657165   | -5.545513 | -3.315360 | H | 6.749286   | 2.375574  | -8.283348 |
| C         | 7.391825   | -2.701315 | -5.189772 | H | 3.940849   | 3.645499  | -7.917508 |
| C         | -0.494293  | 6.617698  | -1.990463 | H | 3.247263   | 1.162114  | -7.770658 |
| C         | -3.370947  | -4.676657 | -4.043506 | H | 6.978898   | -2.790377 | -7.914468 |
| C         | -5.844623  | -0.401208 | -3.267012 | H | 5.276128   | -5.362483 | -7.489206 |
| C         | 0.498916   | 6.767273  | -2.968949 | H | 3.408951   | -3.696903 | -7.467494 |
| <b>1b</b> |            |           |           |   |            |           |           |
| C         | -0.301854  | -2.821291 | 1.498805  | C | 7.846441   | -7.163462 | 2.097903  |
| C         | 0.155007   | -1.404522 | 1.357067  | H | 7.925657   | -7.424590 | 3.148721  |
| C         | 0.176044   | 1.421135  | 1.371980  | C | -1.861988  | -2.266035 | -2.850848 |
| C         | 1.629092   | -1.426714 | 3.393206  | C | -12.815412 | -0.668718 | -2.066811 |
| C         | -0.461147  | -0.686376 | 0.320072  | C | 12.003649  | -4.603088 | -2.112445 |
| C         | -12.818510 | 2.835874  | -0.749003 | C | -3.514351  | 6.291015  | -0.133769 |
| C         | -0.122071  | -3.785491 | 0.498624  | C | 8.942641   | -6.758889 | -0.036921 |
| H         | 0.616953   | -3.617434 | -0.277698 | C | -8.271178  | 7.073070  | 1.042588  |
| C         | -5.824629  | -6.778506 | 0.290717  | C | 6.532233   | -6.528257 | 0.192264  |
| C         | -0.438756  | 0.725262  | 0.319961  | H | 5.591933   | -6.211161 | -0.246383 |
| C         | 1.979378   | -0.756295 | 4.593340  | C | -8.923677  | 5.804065  | -1.332950 |
| C         | -13.262925 | 1.433840  | -0.926786 | C | -7.664802  | -6.221281 | -1.302867 |
| C         | -13.885496 | 0.696741  | 0.096231  | C | 4.162798   | -6.240388 | 2.020452  |
| C         | -0.282850  | 2.833450  | 1.547856  | H | 3.860005   | -6.811414 | 1.147923  |
| C         | -1.227224  | -3.097121 | 2.514293  | C | 12.648856  | -3.428975 | -2.747326 |
| H         | -1.357313  | -2.380009 | 3.318619  | C | 11.817933  | 4.657119  | -2.415803 |
| C         | 1.990483   | 0.705007  | 4.603182  | C | -4.790235  | 6.729713  | -0.462901 |
| C         | 0.905317   | -0.712673 | 2.340293  | C | 7.675283   | -6.533698 | -0.598456 |
| C         | 2.809704   | -3.436115 | 4.158249  | C | 10.143823  | -6.283567 | -0.761100 |
| C         | 1.641047   | 1.397436  | 3.415355  | C | 11.969654  | 4.853746  | -1.033628 |
| C         | -12.838573 | -2.817746 | -0.823411 | H | 12.698129  | 4.261327  | -0.489554 |
| C         | 3.603493   | -4.614608 | 3.743876  | C | 11.610232  | 2.653296  | -3.854742 |

---

|   |            |           |           |   |            |           |           |
|---|------------|-----------|-----------|---|------------|-----------|-----------|
| C | 0.910473   | 0.706427  | 2.351562  | C | 13.099455  | 0.744734  | -3.580638 |
| C | -9.949633  | -5.942833 | -0.516020 | C | 11.991891  | -4.703571 | -0.710127 |
| C | -11.164377 | -5.100651 | -0.599774 | C | 9.985482   | 6.257951  | -2.369947 |
| C | -13.274086 | -1.408872 | -0.964451 | H | 9.223084   | 6.812925  | -2.907868 |
| C | -2.030913  | -5.057307 | 1.312983  | C | 8.990800   | -7.163597 | 1.308596  |
| C | -0.962409  | -4.891833 | 0.415146  | C | 12.422102  | 3.456501  | -3.037664 |
| H | -0.836446  | -5.584966 | -0.409930 | C | -7.618238  | 6.210897  | -1.097531 |
| C | -1.209358  | 3.070000  | 2.572825  | C | 11.090147  | -5.526605 | -0.051504 |
| H | -1.340148  | 2.321691  | 3.348012  | C | 11.177456  | -5.495641 | -2.820722 |
| C | 2.094412   | -2.736523 | 3.190844  | C | 13.193933  | -0.732686 | -3.498299 |
| H | 1.994918   | -3.168710 | 2.206144  | C | 10.864506  | 5.448134  | -3.080232 |
| C | -12.385271 | 3.261545  | 0.517824  | H | 10.771469  | 5.378609  | -4.159896 |
| C | -11.563150 | 4.372935  | 0.659797  | C | 11.937571  | 1.330196  | -4.113664 |
| C | -13.890647 | -0.694345 | 0.077981  | C | 12.123698  | -2.878240 | -3.929796 |
| C | -12.396713 | -3.273633 | 0.429747  | C | 13.617875  | -2.664455 | -2.073406 |
| C | 2.117886   | 2.705654  | 3.231796  | C | 12.403328  | -1.570395 | -4.305152 |
| H | 2.015271   | 3.156139  | 2.255740  | C | 10.262202  | -6.310616 | -2.161115 |
| C | -4.812757  | -6.633686 | -0.675901 | C | -4.130828  | -3.226566 | -3.490341 |
| C | -3.201281  | -5.911957 | 1.005454  | C | 13.870158  | -1.345562 | -2.428425 |
| C | -11.134035 | 5.103438  | -0.460145 | C | -3.857309  | 3.192875  | -3.754686 |
| C | -2.083518  | -4.185139 | 2.415436  | C | 13.662434  | 2.925901  | -2.644473 |
| C | -7.261806  | -6.775048 | -0.074896 | C | 13.997166  | 1.603263  | -2.918611 |
| C | -11.579116 | -4.391691 | 0.539545  | C | -3.163900  | 3.382521  | -5.112976 |
| C | -0.102869  | 3.835074  | 0.585649  | C | -5.504601  | -3.537106 | -2.874947 |
| C | 3.642810   | 4.562714  | 3.796596  | C | -3.536638  | -4.541966 | -4.036371 |
| C | -1.267731  | 1.434122  | -0.703746 | C | -4.403143  | 4.559960  | -3.294558 |
| C | 2.848754   | 3.381926  | 4.204122  | C | -4.333349  | -2.232617 | -4.654938 |
| C | -1.367615  | -1.373384 | -0.653106 | C | -5.034036  | 2.209533  | -3.943105 |
| C | -5.430203  | -6.663517 | 1.635802  | H | -14.318217 | 1.217587  | 0.944973  |

---

---

|   |            |           |           |   |            |           |           |
|---|------------|-----------|-----------|---|------------|-----------|-----------|
| C | -2.061453  | 4.163745  | 2.520259  | H | -12.579038 | 2.638784  | 1.384771  |
| H | -2.859223  | 4.233074  | 3.250818  | H | -11.136728 | 4.592946  | 1.633131  |
| C | -9.916295  | 5.938385  | -0.348558 | H | -14.326771 | -1.234284 | 0.912965  |
| C | 3.242319   | 5.402776  | 2.741286  | H | -12.579145 | -2.668818 | 1.311739  |
| H | 2.215780   | 5.368978  | 2.388105  | H | -5.039455  | -6.786234 | -1.725520 |
| C | -8.279770  | -7.070184 | 0.851484  | H | -2.882381  | -4.282567 | 3.141765  |
| C | -4.147773  | -6.259008 | 1.984581  | H | -11.144431 | -4.633538 | 1.503882  |
| C | 5.515556   | 6.233680  | 2.469709  | H | 0.634069   | 3.696959  | -0.198411 |
| C | 6.588469   | 6.702599  | 1.562558  | H | -6.161597  | -6.796173 | 2.425315  |
| C | 7.849738   | 7.115629  | 2.026733  | H | -8.035535  | -7.577360 | 1.779146  |
| H | 7.977285   | 7.369841  | 3.074626  | H | -3.907690  | -6.135313 | 3.035354  |
| C | -5.415593  | 6.643092  | 1.845863  | H | -6.153787  | 6.726558  | 2.636206  |
| C | -3.175217  | 5.951241  | 1.187328  | H | -2.967485  | 1.679224  | 0.591211  |
| C | 8.954959   | 7.134825  | 1.182135  | H | -0.811045  | 5.673990  | -0.245772 |
| H | 9.925899   | 7.405524  | 1.585665  | H | -2.836780  | -5.965301 | -1.120722 |
| C | -2.577534  | 1.831402  | -0.409192 | H | -9.211887  | -5.273904 | -2.427577 |
| C | -0.938927  | 4.948162  | 0.550415  | H | -12.973276 | -3.362301 | -2.908811 |
| C | -3.542076  | -6.192119 | -0.329406 | H | -10.336900 | -6.843906 | 1.406825  |
| C | -8.974471  | -5.816514 | -1.518581 | H | -4.538244  | -2.577081 | -0.799686 |
| C | -2.005104  | 5.082420  | 1.456385  | H | -11.520353 | -5.330407 | -2.716397 |
| C | -12.578753 | -3.638321 | -1.935721 | H | -11.466408 | 5.380540  | -2.574451 |
| C | 5.868066   | 5.529848  | 3.632893  | H | -12.321043 | 1.250914  | -2.857615 |
| H | 6.904436   | 5.516298  | 3.953685  | H | -4.387527  | 2.710112  | -1.114783 |
| C | 2.544394   | -1.528052 | 5.633139  | H | -3.888155  | 6.074901  | 3.224242  |
| H | 2.746237   | -1.069394 | 6.594385  | H | -1.182059  | 2.389258  | -3.960231 |
| C | 2.937776   | -2.837868 | 5.431176  | H | -12.931743 | 3.427474  | -2.822963 |
| H | 3.412984   | -3.383812 | 6.240030  | H | 0.025695   | -1.403936 | -2.290579 |
| C | 7.556352   | 6.495874  | -0.659810 | H | -10.336357 | 6.837243  | 1.567851  |
| H | 7.431502   | 6.183755  | -1.691082 | H | 0.229560   | 1.364098  | -2.240219 |

---

---

|   |            |           |           |   |            |           |           |
|---|------------|-----------|-----------|---|------------|-----------|-----------|
| C | -9.591194  | -6.657591 | 0.639734  | H | -1.527341  | -2.465486 | -3.864283 |
| C | -3.545190  | -2.326023 | -1.150618 | H | -12.331203 | -1.182958 | -2.890020 |
| C | -11.756800 | -4.754313 | -1.826906 | H | -2.807293  | 6.106724  | -0.934481 |
| C | 8.847955   | 6.738614  | -0.162875 | H | -8.040261  | 7.584999  | 1.971340  |
| C | 6.606511   | -6.751954 | 1.577220  | H | -9.147251  | 5.254759  | -2.241476 |
| C | -3.168708  | -2.606796 | -2.468789 | H | -6.926301  | -5.985288 | -2.058442 |
| C | 5.502585   | -6.281916 | 2.446129  | H | -5.019905  | 6.926074  | -1.504181 |
| C | 6.452587   | 6.479718  | 0.182425  | H | 7.601173   | -6.221935 | -1.635287 |
| H | 5.495217   | 6.157036  | -0.212824 | H | 10.644334  | 3.028374  | -4.176265 |
| C | -11.715877 | 4.786922  | -1.700129 | H | 12.605556  | -4.035419 | -0.117269 |
| C | 3.231607   | -5.425718 | 2.655743  | H | 9.946524   | -7.420679 | 1.755340  |
| H | 2.218436   | -5.372814 | 2.267992  | H | -6.862174  | 5.966199  | -1.834438 |
| C | -7.239975  | 6.782620  | 0.130292  | H | 11.028614  | -5.478516 | 1.030522  |
| C | -12.809692 | 0.719313  | -2.048234 | H | 11.207605  | -5.513004 | -3.905516 |
| C | -5.806251  | 6.808980  | 0.505292  | H | 11.211260  | 0.713006  | -4.629449 |
| C | 2.578450   | 1.452081  | 5.648542  | H | 11.400721  | -3.440164 | -4.511135 |
| H | 2.787732   | 0.974022  | 6.598643  | H | 14.120044  | -3.074045 | -1.203446 |
| C | 4.160884   | 6.219691  | 2.091792  | H | 11.926151  | -1.171410 | -5.193881 |
| H | 3.836123   | 6.813281  | 1.242566  | H | 9.592988   | -6.937784 | -2.742661 |
| C | -3.376125  | 2.419800  | -1.380609 | H | 14.524034  | -0.755790 | -1.795290 |
| C | -2.664712  | -1.713574 | -0.262938 | H | 14.349264  | 3.540253  | -2.069808 |
| H | -2.985128  | -1.506667 | 0.752201  | H | 14.945874  | 1.218174  | -2.558730 |
| C | -4.127470  | 6.243489  | 2.179605  | H | -2.317178  | 4.072614  | -5.041542 |
| C | 5.821632   | -5.604862 | 3.634913  | H | -3.873389  | 3.799409  | -5.834409 |
| H | 6.845698   | -5.609746 | 3.992577  | H | -2.799803  | 2.433152  | -5.517507 |
| C | 10.015734  | 6.303646  | -0.964460 | H | -6.008071  | -2.630023 | -2.527110 |
| C | -1.593108  | 2.245790  | -2.968198 | H | -5.419586  | -4.224338 | -2.029446 |
| C | -12.543993 | 3.679148  | -1.840636 | H | -6.148801  | -4.003516 | -3.627622 |
| C | -0.977161  | -1.661005 | -1.963658 | H | -4.204750  | -4.981726 | -4.785007 |

---

|                                     |            |           |           |   |           |           |           |
|-------------------------------------|------------|-----------|-----------|---|-----------|-----------|-----------|
| C                                   | 2.987622   | 2.759908  | 5.463985  | H | -3.402508 | -5.269447 | -3.230497 |
| H                                   | 3.481891   | 3.285508  | 6.275008  | H | -2.563625 | -4.383223 | -4.509216 |
| C                                   | 4.893255   | -4.790571 | 4.269985  | H | -4.916288 | 4.488811  | -2.333139 |
| H                                   | 5.216295   | -4.182256 | 5.108132  | H | -5.112437 | 4.954851  | -4.030785 |
| C                                   | 4.951369   | 4.712714  | 4.282899  | H | -3.589632 | 5.283964  | -3.183464 |
| H                                   | 5.294231   | 4.082268  | 5.096672  | H | -3.390638 | -2.005294 | -5.160468 |
| C                                   | -9.577799  | 6.653171  | 0.812836  | H | -4.751766 | -1.290297 | -4.287395 |
| C                                   | -2.910353  | 2.624185  | -2.689871 | H | -5.023019 | -2.647980 | -5.398109 |
| C                                   | -0.785147  | 1.660740  | -1.991994 | H | -5.595845 | 2.073134  | -3.015037 |
| C                                   | 11.085568  | 5.656888  | -0.323282 | H | -4.667750 | 1.227835  | -4.259593 |
| H                                   | 11.145147  | 5.670276  | 0.759837  | H | -5.726498 | 2.581420  | -4.706460 |
| <hr/>                               |            |           |           |   |           |           |           |
| 3C <sub>60</sub> @(1b) <sub>2</sub> |            |           |           |   |           |           |           |
| C                                   | -15.762221 | 3.196932  | -0.593857 | C | -4.217839 | -1.302358 | 5.496214  |
| C                                   | -16.018608 | 3.192773  | 0.845127  | C | -5.286112 | -0.609074 | 4.898170  |
| C                                   | -17.155037 | 2.306656  | 1.095077  | C | 7.772046  | -3.466536 | -0.806171 |
| C                                   | -17.604314 | 1.768305  | -0.188646 | C | 6.241462  | 2.342229  | -1.395257 |
| C                                   | -16.739346 | 2.318329  | -1.230615 | C | 9.397097  | -1.395666 | -4.326602 |
| C                                   | -16.360587 | 1.521116  | -2.304339 | C | 8.498361  | 0.090270  | -2.014052 |
| C                                   | -14.989639 | 1.566592  | -2.802059 | C | 9.700059  | 2.835351  | -4.312965 |
| C                                   | -14.058164 | 2.404212  | -2.196289 | C | 9.207420  | -2.038466 | -3.077644 |
| C                                   | -14.453821 | 3.238708  | -1.064227 | C | -4.020807 | 2.975470  | 5.275853  |
| C                                   | -13.336722 | 3.282324  | -0.121768 | C | 10.361972 | 4.130730  | -4.033165 |
| C                                   | -13.582408 | 3.275451  | 1.247029  | C | 8.597506  | -1.326277 | -1.955845 |
| C                                   | -14.957420 | 3.232184  | 1.741408  | C | -1.139513 | 5.745763  | 3.961058  |
| C                                   | -14.978806 | 2.385859  | 2.935464  | C | -2.386258 | 5.135208  | 4.487253  |
| C                                   | -16.060770 | 1.545021  | 3.173406  | C | -4.299113 | 1.534311  | 5.511059  |
| C                                   | -17.177273 | 1.506239  | 2.230506  | C | 5.921426  | 4.399776  | -0.140221 |
| C                                   | -17.643707 | 0.123408  | 2.140420  | C | 7.256655  | 4.314954  | 0.290332  |
| C                                   | -18.069588 | -0.389031 | 0.920446  | C | 6.850376  | -3.905885 | -1.772837 |

---

|   |            |           |           |   |           |           |           |
|---|------------|-----------|-----------|---|-----------|-----------|-----------|
| C | -18.051777 | 0.455026  | -0.274984 | C | 9.192947  | 2.155617  | -3.213876 |
| C | -17.654592 | -0.382285 | -1.406336 | C | -4.050735 | -3.286828 | 3.980444  |
| C | -16.831157 | 0.140388  | -2.396212 | C | -3.285700 | -4.377785 | 3.579714  |
| C | -15.748340 | -0.668896 | -2.948813 | C | -5.325594 | 0.789690  | 4.903778  |
| C | -14.608676 | 0.213083  | -3.198970 | C | -4.100988 | 3.492464  | 3.976355  |
| C | -13.313785 | -0.238529 | -2.971024 | C | 9.813118  | -3.289621 | -2.862206 |
| C | -12.335929 | 0.640984  | -2.334336 | C | 3.844742  | 5.936578  | 2.582656  |
| C | -12.697644 | 1.930428  | -1.957440 | C | 4.913393  | 5.277232  | 0.504294  |
| C | -12.251382 | 2.473197  | -0.673288 | C | -2.332154 | -4.946842 | 4.436714  |
| C | -11.468431 | 1.694724  | 0.172173  | C | 5.451950  | 3.424950  | -1.033843 |
| C | -11.731446 | 1.687206  | 1.610406  | C | 1.354030  | 6.216896  | 2.680164  |
| C | -12.757031 | 2.460803  | 2.133862  | C | -3.295697 | 4.560682  | 3.589766  |
| C | -13.619705 | 1.908045  | 3.177578  | C | 7.983180  | -4.272848 | 0.320526  |
| C | -12.319296 | -0.194827 | 3.099497  | C | 11.484873 | -4.996462 | -3.417695 |
| C | -12.784985 | -1.579153 | 3.011497  | C | 7.100731  | -1.936791 | 1.507445  |
| C | -14.159630 | -1.622096 | 3.502494  | C | 10.542142 | -3.941018 | -3.847600 |
| C | -14.543619 | -0.265419 | 3.896104  | C | 7.372359  | 0.867590  | 1.542799  |
| C | -13.406970 | 0.617213  | 3.649143  | C | 2.626717  | 6.113600  | 0.515330  |
| C | -15.837982 | 0.187777  | 3.665425  | C | 6.001868  | -4.966819 | -1.497875 |
| C | -16.815490 | -0.690577 | 3.027146  | C | -1.197078 | -5.718361 | 3.872026  |
| C | -16.450965 | -1.978458 | 2.651271  | C | 11.195290 | -5.837010 | -2.327777 |
| C | -16.896456 | -2.516810 | 1.368893  | C | 0.163076  | 6.772835  | 2.177921  |
| C | -17.686971 | -1.743382 | 0.525038  | C | 3.758046  | 5.694542  | -0.177030 |
| C | -17.431841 | -1.738638 | -0.913521 | C | 13.554976 | -6.365557 | -2.063883 |
| C | -16.399078 | -2.510164 | -1.434717 | C | 14.677061 | -6.683113 | -1.149844 |
| C | -15.537191 | -1.961536 | -2.479938 | C | 15.982212 | -6.915573 | -1.616937 |
| C | -14.174587 | -2.434738 | -2.236822 | C | 2.354095  | -5.959822 | 0.480405  |
| C | -14.196071 | -3.275663 | -1.042455 | C | 4.774381  | -6.202140 | 0.304291  |
| C | -15.570219 | -3.322680 | -0.547838 | C | 17.076726 | -6.776269 | -0.769267 |

---

---

|   |            |           |           |   |           |           |           |
|---|------------|-----------|-----------|---|-----------|-----------|-----------|
| C | -13.090633 | -1.596850 | -2.477537 | C | 5.846774  | -2.531668 | 1.318057  |
| C | -11.973696 | -1.558603 | -1.535818 | C | 7.100579  | -5.311330 | 0.615706  |
| C | -11.510738 | -0.174867 | -1.444895 | C | 4.957626  | 5.470826  | 1.894390  |
| C | -11.098450 | 0.337841  | -0.222864 | C | 0.062920  | 5.260500  | 4.504077  |
| C | -11.119902 | -0.503045 | 0.968515  | C | 6.017814  | -5.589517 | -0.231910 |
| C | -11.511542 | 0.328399  | 2.102041  | C | -3.303107 | 3.720215  | 6.233439  |
| C | -15.091487 | -2.459329 | 2.896336  | C | 13.820490 | -5.635617 | -3.233028 |
| C | -14.697493 | -3.294184 | 1.762848  | C | 9.577249  | 0.778410  | -5.574636 |
| C | -15.812893 | -3.329679 | 0.819779  | C | 9.815871  | 2.139651  | -5.533632 |
| C | -13.132787 | -3.241774 | -0.146047 | C | 15.590953 | -6.317709 | 1.070059  |
| C | -11.992090 | -2.362486 | -0.398110 | C | -1.062969 | 6.537295  | 2.802793  |
| C | -11.551560 | -1.821528 | 0.886335  | C | 5.595062  | 1.837635  | 2.862273  |
| C | -12.412761 | -2.371594 | 1.930510  | C | -2.493532 | 4.779593  | 5.845158  |
| C | -13.388813 | -3.251023 | 1.293721  | C | 16.901939 | -6.399590 | 0.573262  |
| C | -7.528058  | -2.642999 | 0.415577  | C | 13.048956 | 6.656451  | -1.911061 |
| C | -8.141705  | -1.283454 | 0.453282  | C | 6.494893  | 2.233132  | 3.855830  |
| C | -8.184579  | 1.530731  | 0.494900  | C | 12.046882 | 6.032015  | -2.805947 |
| C | -8.709730  | -1.339861 | 2.897790  | C | 14.499912 | -6.458260 | 0.225232  |
| C | -8.058104  | -0.565320 | -0.740013 | C | -2.330663 | -4.526786 | 5.779441  |
| C | 4.527570   | 3.061096  | -5.669624 | C | 9.858949  | 5.004069  | -3.052429 |
| C | -7.913440  | -3.648618 | -0.480387 | C | 1.114384  | -6.613812 | 2.503172  |
| C | -2.131529  | -5.855353 | -2.392869 | C | -3.236752 | -0.549966 | 6.165331  |
| C | -8.056653  | 0.852382  | -0.721908 | C | 2.337321  | -6.714028 | 1.661907  |
| C | -8.770085  | -0.672962 | 4.149511  | C | 10.004043 | -2.136240 | -5.369541 |
| C | 5.064989   | 1.703952  | -5.953607 | C | 12.213117 | -6.512507 | -1.666215 |
| C | 6.007940   | 1.073486  | -5.118594 | C | 5.162499  | -3.089006 | 2.388564  |
| C | -7.652075  | 2.921643  | 0.515438  | C | 6.024204  | 1.157832  | 1.726494  |
| C | -6.277874  | -2.737104 | 1.040059  | C | 3.549920  | -5.696146 | -0.169450 |
| C | -8.815820  | 0.789414  | 4.166243  | C | 12.505842 | 5.254460  | -3.882115 |

---

---

|   |            |           |           |   |           |           |           |
|---|------------|-----------|-----------|---|-----------|-----------|-----------|
| C | -8.416914  | -0.605521 | 1.670741  | C | 17.992173 | -5.794667 | 1.373644  |
| C | -9.574613  | -3.379739 | 3.934780  | C | 6.938357  | -2.437768 | 3.870125  |
| C | -8.785364  | 1.493040  | 2.933799  | C | -3.097094 | -3.441034 | 6.181913  |
| C | 4.777085   | -2.480363 | -5.385461 | C | 8.290155  | 1.278876  | 2.514520  |
| C | -10.393410 | -4.585004 | 3.666945  | C | 10.563467 | -3.377990 | -5.143075 |
| C | -8.445076  | 0.807718  | 1.688674  | C | 11.675684 | 4.319688  | -4.488401 |
| C | 1.740458   | -5.175778 | -4.138829 | C | 12.803090 | -4.963112 | -3.899080 |
| C | 3.008656   | -4.517867 | -4.550743 | C | -1.305309 | -6.508363 | 2.714406  |
| C | 5.192086   | -1.114987 | -5.796410 | C | 5.683690  | -3.032964 | 3.691342  |
| C | -5.692154  | -4.626550 | -0.364169 | C | 7.644306  | -1.903403 | 2.790929  |
| C | -7.003048  | -4.631917 | -0.867659 | C | 18.900640 | -4.940900 | 0.727104  |
| C | -6.423212  | 3.068966  | 1.172956  | C | 14.268929 | 7.162380  | -2.391371 |
| C | -9.138513  | -2.673976 | 2.822490  | C | 7.855243  | 1.949585  | 3.655063  |
| C | 4.466480   | 3.475187  | -4.329827 | C | -3.276882 | 0.831209  | 6.173350  |
| C | 3.531560   | 4.413741  | -3.916573 | C | 18.353604 | 5.198788  | 2.149045  |
| C | 6.058467   | -0.316086 | -5.031596 | C | 4.737227  | -7.049537 | 1.424984  |
| C | 4.524305   | -2.695427 | -4.021590 | C | 15.255694 | 6.983482  | -0.176801 |
| C | -9.302376  | 2.799154  | 2.889508  | C | -0.166316 | -6.936771 | 2.031445  |
| C | -3.318639  | -5.595384 | -3.103603 | C | 12.909691 | 6.469222  | -0.526436 |
| C | -4.562333  | -5.309812 | -1.037393 | C | 0.090439  | -5.467127 | 4.379446  |
| C | 2.624689   | 4.974032  | -4.824789 | C | 1.276719  | 5.485394  | 3.878243  |
| C | -5.375763  | -3.714125 | 0.654426  | C | 10.689918 | 5.941605  | -2.450192 |
| C | -0.813032  | -5.788356 | -3.069329 | C | 19.085926 | 4.128850  | 2.865633  |
| C | 3.655397   | -3.701774 | -3.612729 | C | 19.523346 | -3.929127 | 2.845189  |
| C | -8.069494  | 3.920870  | -0.371376 | C | 3.539468  | -7.286964 | 2.103711  |
| C | -10.724885 | 4.575744  | 3.779735  | C | 13.993691 | 6.630153  | 0.326012  |
| C | -7.587141  | 1.513415  | -1.977979 | C | 16.450983 | 6.655116  | 0.634246  |
| C | -9.806620  | 3.437846  | 4.013297  | C | 19.653628 | -4.025601 | 1.449939  |
| C | -7.615971  | -1.246614 | -1.995400 | C | 19.013823 | -1.998558 | 4.302359  |

---

---

|   |            |           |           |   |           |           |           |
|---|------------|-----------|-----------|---|-----------|-----------|-----------|
| C | -2.221044  | -5.966246 | -0.994852 | C | 20.150763 | 0.123673  | 3.956251  |
| C | -5.555450  | 4.082557  | 0.806804  | C | 18.417421 | 5.236498  | 0.745144  |
| C | 1.366639   | 5.559182  | -4.304326 | C | 17.973548 | -5.798738 | 2.779552  |
| C | -10.508250 | 5.484320  | 2.728580  | C | 15.354849 | 7.323739  | -1.537527 |
| C | 0.358222   | -6.323179 | -2.504074 | C | 19.944259 | -2.663150 | 3.489133  |
| C | -3.417498  | -5.714448 | -0.333585 | C | 1.223178  | -5.919172 | 3.716328  |
| C | -12.852251 | 6.133853  | 2.762425  | C | 17.489419 | 5.950871  | 0.004791  |
| C | -14.044511 | 6.579028  | 2.003108  | C | 17.400492 | 6.018312  | 2.780421  |
| C | -15.277021 | 6.840519  | 2.625642  | C | 19.980224 | 1.588237  | 3.781759  |
| C | -2.413953  | 6.267803  | -0.905737 | C | 18.724361 | -4.878580 | 3.504020  |
| C | -4.780611  | 5.697524  | -0.888407 | C | 19.114537 | -0.633460 | 4.529476  |
| C | -16.459418 | 6.840361  | 1.892112  | C | 18.538555 | 3.536965  | 4.016991  |
| C | -6.303909  | 2.073627  | -2.006850 | C | 20.193143 | 3.493133  | 2.278462  |
| C | -7.202842  | 4.957628  | -0.718101 | C | 18.989131 | 2.306200  | 4.476349  |
| C | -4.503783  | -5.305492 | -2.440707 | C | 16.462892 | 6.729562  | 2.036893  |
| C | 0.568749   | -4.712462 | -4.757764 | C | 6.021865  | 2.906755  | 5.151096  |
| C | -5.894197  | 4.993708  | -0.207495 | C | 20.614574 | 2.244733  | 2.711670  |
| C | 4.264845   | -3.409922 | -6.309015 | C | 4.886582  | -3.644651 | 4.850965  |
| C | -13.031356 | 5.324866  | 3.895815  | C | 21.078788 | -1.948238 | 3.071036  |
| C | -9.061898  | -1.446866 | 5.298685  | C | 21.183905 | -0.582880 | 3.309479  |
| C | -9.459858  | -2.768334 | 5.200897  | C | 5.482950  | -3.276719 | 6.225930  |
| C | -15.204213 | 6.462008  | -0.127841 | C | 4.495379  | 3.148078  | 5.150689  |
| C | 1.615695   | -6.014624 | -3.023543 | C | 6.735653  | 4.269274  | 5.324788  |
| C | -5.758399  | -1.889717 | -3.405714 | C | 4.908256  | -5.184643 | 4.689100  |
| C | 3.382940   | -4.406794 | -5.899783 | C | 6.368958  | 1.976574  | 6.341395  |
| C | -16.449438 | 6.576692  | 0.511714  | C | 3.426927  | -3.129665 | 4.805951  |
| C | -13.514030 | -6.751151 | 1.745833  | H | 6.493007  | -3.683280 | 6.343045  |
| C | -6.629889  | -2.399338 | -4.375227 | H | 4.853054  | -3.700031 | 7.015915  |
| C | -12.371698 | -6.259688 | 2.551256  | H | 5.520080  | -2.189100 | 6.354367  |

---

---

|   |            |           |           |   |           |           |           |
|---|------------|-----------|-----------|---|-----------|-----------|-----------|
| C | -14.025498 | 6.464965  | 0.603186  | H | 4.211799  | 3.649201  | 6.083002  |
| C | 2.806210   | 4.700617  | -6.191503 | H | 3.946507  | 2.202655  | 5.085982  |
| C | -10.083516 | -5.443372 | 2.597639  | H | 4.198863  | 3.780953  | 4.308262  |
| C | -1.107512  | 6.140683  | -3.049664 | H | 6.413518  | 4.746819  | 6.257308  |
| C | 4.336460   | 0.897782  | -6.845077 | H | 6.489932  | 4.930793  | 4.487852  |
| C | -2.387395  | 6.226002  | -2.309825 | H | 7.821964  | 4.142444  | 5.356599  |
| C | -9.168392  | 1.511042  | 5.332965  | H | 4.503085  | -5.477899 | 3.717580  |
| C | -11.553883 | 6.253927  | 2.233492  | H | 4.316190  | -5.659390 | 5.481812  |
| C | -5.709844  | 2.421612  | -3.209712 | H | 5.938860  | -5.551386 | 4.753420  |
| C | -6.246538  | -1.319960 | -2.236094 | H | 5.879024  | 1.005807  | 6.209808  |
| C | -3.593347  | 6.026217  | -0.210476 | H | 6.028375  | 2.424851  | 7.282181  |
| C | -12.638608 | -5.501523 | 3.703598  | H | 7.449249  | 1.812480  | 6.402408  |
| C | -17.658198 | 6.122473  | -0.215025 | H | 2.858325  | -3.549517 | 5.644847  |
| C | -7.675195  | 1.714791  | -4.391764 | H | 2.927149  | -3.416595 | 3.878562  |
| C | 3.750639   | 3.767278  | -6.607837 | H | 3.408027  | -2.037767 | 4.877967  |
| C | -8.500881  | -1.770806 | -2.939913 | H | -8.890697 | -3.603222 | -0.942239 |
| C | -9.658851  | 2.801392  | 5.265068  | H | 6.660757  | 1.663046  | -4.486213 |
| C | -11.663571 | -4.679226 | 4.255614  | H | -5.977386 | -1.954227 | 1.724888  |
| C | -11.984787 | 4.559758  | 4.397648  | H | -7.285042 | -5.354627 | -1.623960 |
| C | 1.309536   | 6.415350  | -3.192730 | H | -6.101404 | 2.289101  | 1.851438  |
| C | -6.364585  | 2.206401  | -4.432124 | H | -9.256223 | -3.124563 | 1.852073  |
| C | -8.283122  | 1.377206  | -3.180083 | H | 5.068397  | 2.969439  | -3.591149 |
| C | -18.572685 | 5.294188  | 0.455784  | H | 3.400271  | 4.605009  | -2.862531 |
| C | -14.721585 | -7.165921 | 2.332581  | H | 6.736152  | -0.780256 | -4.327431 |
| C | -8.008959  | -2.341166 | -4.112838 | H | 4.878671  | -1.974785 | -3.296201 |
| C | 4.403000   | -0.485122 | -6.772852 | H | -9.436877 | 3.268052  | 1.929794  |
| C | -19.052958 | -4.670030 | -1.684947 | H | -3.301229 | -5.561194 | -4.185478 |
| C | -4.777984  | 5.772645  | -2.291193 | H | -4.364404 | -3.672713 | 1.024774  |
| C | -15.904180 | -6.811216 | 0.237584  | H | 3.350902  | -3.747932 | -2.577997 |

---

---

|   |            |           |           |   |            |           |           |
|---|------------|-----------|-----------|---|------------|-----------|-----------|
| C | 0.090875   | 6.706510  | -2.580345 | H | -9.025180  | 3.819482  | -0.871224 |
| C | -13.497579 | -6.520505 | 0.360608  | H | -1.328956  | -6.144313 | -0.409522 |
| C | 0.161824   | 5.043865  | -4.808768 | H | -4.544280  | 4.065672  | 1.178353  |
| C | -0.679998  | -5.004620 | -4.229953 | H | -9.529622  | 5.540131  | 2.265051  |
| C | -11.057809 | -6.271045 | 2.051926  | H | 0.293952   | -6.963390 | -1.632862 |
| C | -19.759912 | -3.507322 | -2.270025 | H | -3.445644  | -5.753665 | 0.747053  |
| C | -19.486262 | 4.516232  | -1.656249 | H | -15.311118 | 6.995113  | 3.697662  |
| C | -3.608730  | 6.054916  | -2.985052 | H | -1.491244  | 6.390203  | -0.353189 |
| C | -14.671166 | -6.549558 | -0.380277 | H | -17.404738 | 6.994601  | 2.398989  |
| C | -17.140337 | -6.348071 | -0.434844 | H | -5.763361  | 2.210589  | -1.083995 |
| C | -19.470625 | 4.506678  | -0.251617 | H | -7.507085  | 5.679733  | -1.466236 |
| C | -19.313330 | 2.683942  | -3.309711 | H | -5.368809  | -4.977632 | -3.002898 |
| C | -20.585837 | 0.634949  | -2.989689 | H | 0.656106   | -4.031609 | -5.595495 |
| C | -18.986672 | -4.779429 | -0.284939 | H | 4.495353   | -3.294537 | -7.361838 |
| C | -17.775540 | 6.240864  | -1.611387 | H | -14.027318 | 5.187980  | 4.297551  |
| C | -15.897244 | -7.196769 | 1.589883  | H | -9.044478  | -0.979811 | 6.273767  |
| C | -20.085012 | 3.349463  | -2.345283 | H | -9.737414  | -3.319144 | 6.091632  |
| C | -1.047320  | 5.322884  | -4.191867 | H | -15.170670 | 6.229938  | -1.184070 |
| C | -18.053717 | -5.601462 | 0.326034  | H | 2.501673   | -6.405144 | -2.539868 |
| C | -18.232943 | -5.522881 | -2.445375 | H | -4.689597  | -1.924882 | -3.551783 |
| C | -20.523433 | -0.848342 | -2.934689 | H | 2.925293   | -5.061299 | -6.632537 |
| C | -18.672174 | 5.448489  | -2.321130 | H | -13.093930 | 6.235662  | 0.103334  |
| C | -19.558066 | 1.354459  | -3.623687 | H | 2.161949   | 5.179777  | -6.919655 |
| C | -19.261242 | -2.874484 | -3.421472 | H | -9.093883  | -5.408994 | 2.155991  |
| C | -20.767404 | -2.840161 | -1.552779 | H | 3.597535   | 1.353475  | -7.491422 |
| C | -19.649228 | -1.583606 | -3.756982 | H | -9.127921  | 1.019476  | 6.295154  |
| C | -17.291105 | -6.344269 | -1.831705 | H | -11.379137 | 6.918486  | 1.395797  |
| C | -6.119252  | -2.974155 | -5.703980 | H | -4.707032  | 2.827633  | -3.192634 |
| C | -21.124146 | -1.536700 | -1.864733 | H | -5.566241  | -0.927392 | -1.497968 |

---

---

|   |            |           |           |   |            |           |           |
|---|------------|-----------|-----------|---|------------|-----------|-----------|
| C | -5.589249  | 2.417737  | -5.738877 | H | -3.578856  | 6.021749  | 0.871541  |
| C | -21.227243 | 2.694594  | -1.855324 | H | -13.652632 | -5.451743 | 4.080057  |
| C | -21.477333 | 1.366665  | -2.179924 | H | -8.222897  | 1.552174  | -5.309705 |
| C | -6.474995  | 2.209794  | -6.984362 | H | 3.834854   | 3.528682  | -7.661543 |
| C | -4.577449  | -2.928294 | -5.798260 | H | -9.567469  | -1.723479 | -2.757011 |
| C | -6.579079  | -4.445848 | -5.844384 | H | -9.984846  | 3.306276  | 6.166537  |
| C | -4.994787  | 3.846575  | -5.783023 | H | -11.926427 | -3.999785 | 5.057125  |
| C | -6.702629  | -2.129755 | -6.865619 | H | -12.178279 | 3.841575  | 5.184842  |
| C | -4.437472  | 1.377653  | -5.774775 | H | 2.224799   | 6.846769  | -2.803948 |
| C | -3.057773  | -1.339063 | 1.398216  | H | -9.279941  | 0.955214  | -3.174870 |
| C | -3.229709  | 1.495260  | 1.207820  | H | -18.482976 | 5.164160  | 1.526545  |
| C | -3.611661  | -0.721578 | 0.196092  | H | -14.744944 | -7.410396 | 3.388114  |
| C | -2.706260  | 0.907643  | 2.354795  | H | -8.710747  | -2.733170 | -4.839917 |
| C | -2.620649  | -0.548162 | 2.454399  | H | 3.720434   | -1.081301 | -7.365498 |
| C | -3.699028  | 0.661733  | 0.103205  | H | -5.672534  | 5.507573  | -2.840318 |
| C | 1.918410   | 2.835309  | -1.083647 | H | 0.068094   | 7.372662  | -1.725424 |
| C | 1.151143   | -1.153601 | -3.080118 | H | -12.584968 | -6.173641 | -0.106315 |
| C | -2.591629  | 2.679395  | 0.633222  | H | 0.198020   | 4.340596  | -5.631190 |
| C | 1.995300   | 2.937091  | 0.372940  | H | -1.553382  | -4.535135 | -4.662450 |
| C | -0.642050  | -1.999197 | 2.756011  | H | -10.817855 | -6.892105 | 1.196945  |
| C | -1.378548  | -0.885213 | 3.148751  | H | -3.628719  | 6.080671  | -4.066923 |
| C | -1.830521  | 1.047796  | -3.075828 | H | -14.654928 | -6.224080 | -1.412396 |
| C | 2.809957   | 1.831095  | 0.858364  | H | -20.067561 | 3.773773  | 0.276049  |
| C | -2.674049  | 2.582953  | -0.824112 | H | -18.425640 | 3.164279  | -3.699789 |
| C | 0.741485   | 3.160290  | -1.746444 | H | -19.574928 | -4.114010 | 0.331373  |
| C | -0.352158  | 3.689728  | 0.407493  | H | -17.120959 | 6.919698  | -2.145161 |
| C | -0.912882  | 2.602673  | 2.439137  | H | -16.830290 | -7.464191 | 2.071984  |
| C | 0.888670   | 3.352860  | 1.101720  | H | -1.944186  | 4.827379  | -4.539796 |
| C | -0.425438  | 3.594890  | -0.979129 | H | -17.934859 | -5.559097 | 1.400872  |

---

---

|   |           |           |           |   |            |           |           |
|---|-----------|-----------|-----------|---|------------|-----------|-----------|
| C | -1.183792 | 2.240439  | -2.765085 | H | -18.300669 | -5.507794 | -3.526567 |
| C | 1.324751  | 1.633565  | 2.823161  | H | -18.706920 | 5.510688  | -3.402606 |
| C | -3.343317 | 1.327438  | -1.147563 | H | -18.852576 | 0.840826  | -4.260778 |
| C | 0.328642  | -0.045432 | -3.569847 | H | -18.483681 | -3.355804 | -4.000991 |
| C | -1.465257 | 3.222467  | 1.234729  | H | -21.224578 | -3.320348 | -0.696780 |
| C | -1.056568 | -0.122930 | -3.492002 | H | -19.197104 | -1.115000 | -4.621093 |
| C | -1.616204 | 3.026306  | -1.610305 | H | -16.631935 | -6.951653 | -2.440990 |
| C | 2.480013  | 1.192223  | 2.048194  | H | -21.817281 | -1.021534 | -1.213743 |
| C | -2.940702 | 0.582024  | -2.248659 | H | -21.884449 | 3.212010  | -1.166034 |
| C | 0.543294  | 2.684347  | 2.353986  | H | -22.338032 | 0.875901  | -1.743886 |
| C | 2.689014  | 1.662760  | -1.495507 | H | -7.323716  | 2.902421  | -6.985092 |
| C | 2.866002  | -1.174707 | -1.302508 | H | -6.853118  | 1.182805  | -7.025178 |
| C | 3.236312  | 1.042663  | -0.293299 | H | -5.878973  | 2.389911  | -7.885483 |
| C | 2.338570  | -0.585091 | -2.447766 | H | -4.264052  | -3.355283 | -6.757109 |
| C | 2.254239  | 0.871094  | -2.551378 | H | -4.114029  | -3.505902 | -4.991473 |
| C | 3.329377  | -0.339981 | -0.197946 | H | -4.212680  | -1.897255 | -5.743879 |
| C | -2.279091 | -2.503535 | 0.982555  | H | -7.670110  | -4.520117 | -5.806568 |
| C | -1.516799 | 1.476240  | 2.985986  | H | -6.163701  | -5.049062 | -5.030474 |
| C | 2.230245  | -2.361091 | -0.729255 | H | -6.234162  | -4.858702 | -6.799349 |
| C | -2.359370 | -2.609318 | -0.472271 | H | -5.795233  | 4.592931  | -5.731500 |
| C | 0.274282  | 2.321069  | -2.850064 | H | -4.436762  | 3.989390  | -6.715612 |
| C | 1.010401  | 1.207433  | -3.243160 | H | -4.312447  | 4.009489  | -4.943820 |
| C | 1.462847  | -0.724763 | 2.979264  | H | -6.400322  | -1.083577 | -6.754037 |
| C | -3.178275 | -1.507489 | -0.957260 | H | -7.796015  | -2.173641 | -6.867809 |
| C | 2.305106  | -2.258116 | 0.727736  | H | -6.334625  | -2.506341 | -7.827063 |
| C | -1.108156 | -2.836246 | 1.649639  | H | -4.848998  | 0.365346  | -5.706868 |
| C | -0.014538 | -3.363435 | -0.505610 | H | -3.754813  | 1.523138  | -4.933047 |
| C | 0.547513  | -2.281613 | -2.535909 | H | -3.871876  | 1.473515  | -6.709367 |
| C | -1.256154 | -3.031021 | -1.201610 | H | 9.042610   | 3.116421  | 0.354919  |

---

---

|   |           |           |           |   |           |           |           |
|---|-----------|-----------|-----------|---|-----------|-----------|-----------|
| C | 0.058046  | -3.269872 | 0.881495  | H | -6.086385 | -1.155198 | 4.412579  |
| C | 0.814884  | -1.916407 | 2.669686  | H | 5.823206  | 1.537688  | -1.989166 |
| C | -1.691367 | -1.311563 | -2.920678 | H | 7.653633  | 5.068881  | 0.959692  |
| C | 2.984302  | -1.007444 | 1.055381  | H | 6.733890  | -3.351901 | -2.694743 |
| C | -0.696312 | 0.367515  | 3.475869  | H | 9.131494  | 2.683297  | -2.280091 |
| C | 1.099327  | -2.900384 | -1.331676 | H | -4.679385 | -2.784431 | 3.260545  |
| C | 0.689268  | 0.445028  | 3.394146  | H | -3.328351 | -4.700241 | 2.550445  |
| C | 1.248314  | -2.703366 | 1.514529  | H | -6.153975 | 1.295376  | 4.421250  |
| C | -2.850368 | -0.871183 | -2.148806 | H | -4.663960 | 2.952499  | 3.230835  |
| C | 2.576085  | -0.260956 | 2.153753  | H | 9.813434  | -3.694066 | -1.863855 |
| C | -0.909747 | -2.363196 | -2.453360 | H | 3.898863  | 6.047577  | 3.658276  |
| C | 15.848030 | -2.978089 | 1.245681  | H | 4.416391  | 3.441977  | -1.333865 |
| C | 16.281925 | -3.041716 | -0.148524 | H | -3.238669 | 4.831678  | 2.546539  |
| C | 17.370069 | -2.079964 | -0.323830 | H | 8.723494  | -3.978216 | 1.052408  |
| C | 17.612069 | -1.426238 | 0.962357  | H | 1.709062  | 6.284921  | -0.034337 |
| C | 16.667364 | -1.981460 | 1.929806  | H | 5.251270  | -5.234219 | -2.230043 |
| C | 16.096625 | -1.153405 | 2.889536  | H | 10.174658 | -5.914407 | -1.970253 |
| C | 14.681326 | -1.283610 | 3.219853  | H | 0.192739  | 7.377162  | 1.278429  |
| C | 13.900145 | -2.233533 | 2.569143  | H | 3.717650  | 5.610456  | -1.253577 |
| C | 14.497415 | -3.099969 | 1.556135  | H | 16.140291 | -7.154266 | -2.662097 |
| C | 13.513886 | -3.297226 | 0.492153  | H | 1.443702  | -5.487296 | 0.139076  |
| C | 13.927982 | -3.354446 | -0.833714 | H | 18.078927 | -6.906446 | -1.160564 |
| C | 15.347208 | -3.225877 | -1.160514 | H | 5.433031  | -2.591778 | 0.320015  |
| C | 15.453847 | -2.456641 | -2.401106 | H | 7.157624  | -5.782076 | 1.589203  |
| C | 16.490347 | -1.544463 | -2.568336 | H | 5.835585  | 5.158086  | 2.444927  |
| C | 17.473079 | -1.352655 | -1.503207 | H | 0.019981  | 4.600207  | 5.360438  |
| C | 17.817661 | 0.067622  | -1.458325 | H | -3.311682 | 3.400625  | 7.268934  |
| C | 18.046321 | 0.689528  | -0.236411 | H | 14.847206 | -5.477799 | -3.537836 |
| C | 17.942801 | -0.076613 | 1.006137  | H | 9.727217  | 0.252205  | -6.507065 |

---

---

|   |           |           |           |   |           |           |           |
|---|-----------|-----------|-----------|---|-----------|-----------|-----------|
| C | 17.343945 | 0.793269  | 2.017786  | H | 10.144008 | 2.661988  | -6.424199 |
| C | 16.444885 | 0.265512  | 2.936638  | H | 15.431480 | -6.001399 | 2.092426  |
| C | 15.242658 | 1.013397  | 3.294673  | H | -1.968600 | 6.954740  | 2.377825  |
| C | 14.151266 | 0.055201  | 3.469086  | H | 4.543851  | 2.046898  | 2.965861  |
| C | 12.865019 | 0.379960  | 3.054832  | H | -1.872662 | 5.281854  | 6.577991  |
| C | 12.044178 | -0.617594 | 2.370328  | H | 13.508538 | -6.248786 | 0.604177  |
| C | 12.547898 | -1.892800 | 2.133607  | H | -1.679037 | -5.018221 | 6.492164  |
| C | 12.309121 | -2.549651 | 0.848325  | H | 8.833794  | 4.898318  | -2.716240 |
| C | 11.579262 | -1.896311 | -0.139686 | H | -2.375511 | -1.057123 | 6.579349  |
| C | 12.020199 | -1.955729 | -1.532751 | H | 10.102010 | -1.693066 | -6.350706 |
| C | 13.160643 | -2.669566 | -1.869872 | H | 11.977076 | -7.121147 | -0.801501 |
| C | 14.103594 | -2.111043 | -2.838218 | H | 4.213654  | -3.573766 | 2.200483  |
| C | 12.646659 | -0.126071 | -3.071828 | H | 5.315299  | 0.859855  | 0.972599  |
| C | 12.990166 | 1.294706  | -3.029978 | H | 3.549914  | -4.996379 | -0.989718 |
| C | 14.409394 | 1.423147  | -3.352668 | H | 13.555719 | 5.284608  | -4.145423 |
| C | 14.942126 | 0.082142  | -3.597275 | H | 7.376178  | -2.379595 | 4.856982  |
| C | 13.853939 | -0.875802 | -3.425667 | H | -3.035333 | -3.091832 | 7.205724  |
| C | 16.228177 | -0.244492 | -3.180603 | H | 9.339418  | 1.067524  | 2.370618  |
| C | 17.047704 | 0.751465  | -2.494937 | H | 11.072479 | -3.897469 | -5.946037 |
| C | 16.541550 | 2.024939  | -2.260247 | H | 12.086416 | 3.632008  | -5.217418 |
| C | 16.779664 | 2.678104  | -0.975887 | H | 13.052160 | -4.297246 | -4.715720 |
| C | 17.514758 | 2.028797  | 0.010729  | H | -2.285324 | -6.767344 | 2.332808  |
| C | 17.081933 | 2.092509  | 1.404640  | H | 8.612659  | -1.446546 | 2.948857  |
| C | 15.936845 | 2.805723  | 1.740966  | H | 18.910351 | -4.899901 | -0.354495 |
| C | 14.994735 | 2.252122  | 2.711761  | H | 14.378501 | 7.373971  | -3.448577 |
| C | 13.641755 | 2.592009  | 2.272200  | H | 8.585270  | 2.245211  | 4.399812  |
| C | 13.748733 | 3.355477  | 1.031431  | H | -2.447413 | 1.384753  | 6.592993  |
| C | 15.166233 | 3.488297  | 0.704069  | H | 5.656033  | -7.483714 | 1.800926  |
| C | 12.603883 | 1.680887  | 2.440301  | H | -0.267267 | -7.508994 | 1.116324  |

---

|   |           |           |           |   |           |           |           |
|---|-----------|-----------|-----------|---|-----------|-----------|-----------|
| C | 11.626480 | 1.487594  | 1.373695  | H | 11.987878 | 6.054019  | -0.140031 |
| C | 11.284325 | 0.066780  | 1.328029  | H | 0.203319  | -4.826018 | 5.244464  |
| C | 11.058466 | -0.554398 | 0.107992  | H | 2.160128  | 4.992355  | 4.260540  |
| C | 11.167569 | 0.211034  | -1.130351 | H | 10.302430 | 6.571910  | -1.658415 |
| C | 11.759332 | -0.653611 | -2.145465 | H | 3.540747  | -7.889245 | 3.004737  |
| C | 15.190925 | 2.372183  | -2.701241 | H | 13.901004 | 6.337623  | 1.364022  |
| C | 14.594753 | 3.240964  | -1.687152 | H | 20.240035 | -3.283121 | 0.923768  |
| C | 15.576971 | 3.429322  | -0.621527 | H | 18.127095 | -2.525460 | 4.629528  |
| C | 12.812279 | 3.176411  | 0.017888  | H | 19.112600 | 4.593999  | 0.223282  |
| C | 11.722562 | 2.218361  | 0.193754  | H | 17.323425 | -6.491087 | 3.301388  |
| C | 11.485514 | 1.563467  | -1.092883 | H | 16.306079 | 7.658834  | -1.934324 |
| C | 12.424760 | 2.119569  | -2.062255 | H | 2.204674  | -5.649001 | 4.080686  |
| C | 13.244434 | 3.117236  | -1.377510 | H | 17.480743 | 5.850215  | -1.072759 |
| C | 7.525352  | 2.195937  | -0.859187 | H | 17.362974 | 6.061729  | 3.862216  |
| C | 8.064976  | 0.799557  | -0.863420 | H | 18.651794 | -4.855392 | 4.585178  |
| C | 8.149320  | -2.022159 | -0.800054 | H | 18.300533 | -0.136293 | 5.037174  |
| C | 8.915928  | 0.779667  | -3.235356 | H | 17.684114 | 3.995046  | 4.498646  |
| C | 7.815632  | 0.114813  | 0.328158  | H | 20.684193 | 3.946933  | 1.427013  |
| C | -3.885996 | -2.729895 | 5.256101  | H | 18.504317 | 1.863431  | 5.336561  |
| C | 8.046716  | 3.219531  | -0.056540 | H | 15.701928 | 7.309028  | 2.546654  |
| C | 2.625624  | 6.174404  | 1.918222  | H | 21.391181 | 1.738610  | 2.154350  |
| C | 7.781058  | -1.295577 | 0.343818  | H | 21.849357 | -2.455625 | 2.502207  |
| C | 9.220370  | 0.050989  | -4.415455 | H | 22.047158 | -0.050088 | 2.931248  |

## REFERENCES

- (S1) S. Wang, X. Li, G. Zhuang, M. Chen, P. Huang, S. Yang, P. Du, *Chem. Commun.* **2021**, 57, 9104-9107.
- (S2) K. A. Connors, *Binding Constants*, Wiley, New York, **1987**.

- (S3) T. Iwamoto, Y. Watanabe, T. Sadahiro, T. Haino, S. Yamago, *Angew. Chem. Int. Ed.* **2011**, *50*, 8342-8344.
- (S4) Gaussian 09, Revision A.1, M. J. Frisch, et.al Gaussian, Inc., Wallingford CT, **2009**.
- (S5) Grimme S, Ehrlich S, Goerigk L. *J. Comp. Chem.* **2011**, *32*, 1456-1465.
- (S6) S. Miertuš, E. Scrocco, and J. Tomasi, *Chem. Phys.* **1981**, *55*, 117-129.
- (S7) Y. Segawa, H. Omachi, K. Itami, *Org. Lett.* **2010**, *12*, 2262-2265.
- (S8) H. Takaba, H. Omachi, Y. Yamamoto, J. Bouffard, K. Itami, *Angew. Chem. Int. Ed.* **2009**, *48*, 6112-6116.
